# Supplementary material for: Similarities and differences in the associations between patient safety culture dimensions and self-reported outcomes in two different cultural settings: a national cross-sectional study in Palestinian and Belgian hospitals
Source: PubMed Central journal article supplement — BMJ Open. 2018 Jul 30;8(7):e021504. doi: 10.1136/bmjopen-2018-021504 (PMC6067346; doi:10.1136/bmjopen-2018-021504), 2018-07-30
Supplement: bmjopen-2018-021504.draft_revisions.pdf [file bmjopen-2018-021504.draft_revisions.pdf]

# BMJ Open

BMJ Open is committed to open peer review. As part of this commitment we make the peer review history of every article we publish publicly available.

When an article is published we post the peer reviewers' comments and the authors' responses online. We also post the versions of the paper that were used during peer review. These are the versions that the peer review comments apply to.

The versions of the paper that follow are the versions that were submitted during the peer review process. They are not the versions of record or the final published versions. They should not be cited or distributed as the published version of this manuscript.

BMJ Open is an open access journal and the full, final, typeset and author-corrected version of record of the manuscript is available on our site with no access controls, subscription charges or pay-per-view fees (<http://bmjopen.bmj.com>).

If you have any questions on BMJ Open's open peer review process please email [info.bmjopen@bmj.com](mailto:info.bmjopen@bmj.com)

# BMJ Open

## Similarities and differences on the associations between patient safety culture dimensions and self-reported outcomes in two different culture settings: National cross sectional study in Palestinian and Belgian Hospitals

|                               |                                                                                                                                                                                                                                                                                                                                                                                                                                                                                                                                                                                                                                                                                                                                                                                                                                                                                                                                                                                                                                 |
|-------------------------------|---------------------------------------------------------------------------------------------------------------------------------------------------------------------------------------------------------------------------------------------------------------------------------------------------------------------------------------------------------------------------------------------------------------------------------------------------------------------------------------------------------------------------------------------------------------------------------------------------------------------------------------------------------------------------------------------------------------------------------------------------------------------------------------------------------------------------------------------------------------------------------------------------------------------------------------------------------------------------------------------------------------------------------|
| Journal:                      | <i>BMJ Open</i>                                                                                                                                                                                                                                                                                                                                                                                                                                                                                                                                                                                                                                                                                                                                                                                                                                                                                                                                                                                                                 |
| Manuscript ID                 | bmjopen-2018-021504                                                                                                                                                                                                                                                                                                                                                                                                                                                                                                                                                                                                                                                                                                                                                                                                                                                                                                                                                                                                             |
| Article Type:                 | Research                                                                                                                                                                                                                                                                                                                                                                                                                                                                                                                                                                                                                                                                                                                                                                                                                                                                                                                                                                                                                        |
| Date Submitted by the Author: | 04-Jan-2018                                                                                                                                                                                                                                                                                                                                                                                                                                                                                                                                                                                                                                                                                                                                                                                                                                                                                                                                                                                                                     |
| Complete List of Authors:     | <p>Najjar, Shahenaz; KU Leuven, Health Service Research Group, School of Public Health; King Abdullah International Medical Research Center, population health research section</p> <p>Baillien, Elfi; Katholieke Universiteit Leuven, Marketing and Organisation Studies (MO)</p> <p>Vanhaecht, Kris; KU Leuven, Health Service Research Group, School of Public Health</p> <p>Hamdan, Motasem ; Al Quds University Faculty of Medicine, Public Health</p> <p>Euwema, Martin; KU Leuven , Occupational &amp; Organisational Psychology and Professional Learning</p> <p>Vleugels, Arthur; KU Leuven, Health Service Research Group, School of Public Health</p> <p>Sermeus, Walter; KU Leuven, Health Service Research Group, School of Public Health</p> <p>Hellings , J; Universiteit Hasselt Faculteit Geneeskunde en Levenswetenschappen</p> <p>Schrooten, Ward; Universiteit Hasselt Faculteit Geneeskunde en Levenswetenschappen</p> <p>Vlayen, A; Universiteit Hasselt Faculteit Geneeskunde en Levenswetenschappen</p> |
| Keywords:                     | Health & safety < HEALTH SERVICES ADMINISTRATION & MANAGEMENT, Organisation of health services < HEALTH SERVICES ADMINISTRATION & MANAGEMENT, Quality in health care < HEALTH SERVICES ADMINISTRATION & MANAGEMENT, Risk management < HEALTH SERVICES ADMINISTRATION & MANAGEMENT, Public health < INFECTIOUS DISEASES                                                                                                                                                                                                                                                                                                                                                                                                                                                                                                                                                                                                                                                                                                          |
|                               |                                                                                                                                                                                                                                                                                                                                                                                                                                                                                                                                                                                                                                                                                                                                                                                                                                                                                                                                                                                                                                 |

SCHOLARONE™  
Manuscripts

1  
2  
3  
4 **Similarities and differences on the associations between patient**  
5 **safety culture dimensions and self-reported outcomes in two**  
6 **different culture settings: National cross sectional study in**  
7 **Palestinian and Belgian Hospitals**  
8  
9

10  
11 Shahenaz Najjar, Elfi Baillien, Kris Vanhaecht, Motasem Hamdan, Martin Euwema, Arthur  
12 Vleugels, Walter Sermeus, Ward Schrooten, Johan Hellings, Annemie Vlayen  
13  
14

15  
16  
17  
18 **Corresponding author: Dr. Shahenaz Najjar**  
19

20 Health Services Research Group, School of Public Health, KULeuven, University of Leuven,  
21 Belgium. Currently, King Abdullah International Medical Research Center/King Saud bin  
22 Abdulaziz University for Health Sciences, Population Health Department-Hospital-NGHA,  
23 Riyadh, Saudi Arabia  
24  
25  
26  
27  
28  
29  
30

31 Currently address:

32 Population Health Research Section

33 King Abdullah International Medical Research Center (KAIMRC new building)

34 King Saud Bin Abdulaziz University for Health Sciences

35 King Abdulaziz Medical City – Riyadh

36 Ministry of National Guard - Health Affairs

37 P.O. Box 3660, Riyadh 11481, Saudi Arabia

38 Mail Code: 1515 (KAIMRC)

39 Tel: +966 11 429 4444 Ext. 94372

40 e-mail: [shnajjar@gmail.com](mailto:shnajjar@gmail.com)

41 Fax: +966 (11) 80 43050, +966(11) 429-4440  
42  
43  
44  
45  
46  
47  
48  
49  
50  
51  
52

1  
2  
3  
4  
5 Dr. Elfi Baillien: University of Leuevn, Brussel, Belgium

6  
7 Dr. Kris Vanhaecht: University of Leuevn, Leuven, Belgium

8  
9 Dr. Motasem Hamdan: Al-Quds University, Jerusalem, Palestine

10  
11 Dr. Martin Euwema: University of Leuevn, Leuven, Belgium

12  
13 Dr. Arthur Vleugels: University of Leuevn, Leuven, Belgium

14  
15 Dr. Walter Sermeus: University of Leuevn, Leuven, Belgium

16  
17 Dr. Ward Schrooten: Universiteit Hasselt, Diepenbeek, Belgium

18  
19 Dr. Johan Hellings: Universiteit Hasselt, Diepenbeek, Belgium

20  
21 Dr. Annemie Vlayen: Universiteit Hasselt, Diepenbeek, Belgium

22  
23  
24  
25  
26 **Key words:** Patient safety, Patient safety culture, health services, Palestine, Belgium.

27  
28  
29  
30  
31 **Word count (excluding title page, reference, figures):**

- 32  
33 - **Abstract: 300**
- 34  
35 - **Strengths and limitations of this study: 123**
- 36  
37 - **Main manuscript: 3856**
- 38  
39  
40  
41  
42  
43  
44  
45  
46  
47  
48  
49  
50  
51  
52  
53  
54  
55  
56  
57  
58  
59  
60

## Abstract

**Objectives:** To test the relationships between patient safety culture dimensions and self-reported outcomes across different cultures. And gain insight in the cultural differences regarding patient safety culture.

**Design:** Observational, cross sectional study design.

**Setting:** 90 Belgian hospitals and 13 Palestinian hospitals.

**Participants:** 2,836 healthcare professionals matched on profession, tenure and working hours.

**Primary and secondary outcome measures:** The validated version of HSOPSC was used. An exploratory factor analysis was conducted across the participated countries. Reliability was tested using Cronbach's alpha. The study examined the specific predictive value of the patient safety culture dimensions and its self-reported outcome measures across different cultures and countries. Hierarchical regression analyses and bivariate analyses were performed using IBM SPSS version 20.0 (SPSS Inc.,Chicago,IL,USA).

**Results:** Eight safety dimensions and four outcomes were distinguished in both countries. Cronbach's alpha was  $\alpha \geq 0.60$ . Significant correlations were found between safety culture dimensions and at least one of the outcomes in both samples (*p-value between*  $<0.05$  &  $<0.001$ ). Hierarchical analyses showed the relationship between the four outcomes and each best predictor. Overall perception of safety was highly predicted by hospital management support in Palestine ( $\beta=0.16, p<0.001$ ), and staffing in Belgium ( $\beta=0.24, p<0.001$ ). Frequency of events was mostly predicted by feedback and communication in both countries (Palestine; $\beta=0.24, p<0.001$ , Belgium; $\beta= 0.35,p<0.001$ ). Overall grade on patient safety was predicted by organizational learning in Palestine ( $\beta=0.19, p<0.001$ ) and staffing in Belgium ( $\beta=0.19, p<0.001$ ). Number of events reported was predicted by staffing in Palestine ( $\beta=-0.20, p<0.001$ ) and feedback and communication in Belgium ( $\beta=0.11, p<0.01$ ).

1  
2  
3 **Conclusion:** To promote patient safety in Palestine and Belgium, staffing and communication  
4 regarding errors should be improved in both countries. Initiatives to improve hospital  
5 management support and the establishment of constructive learning systems would be  
6 especially beneficial for patient safety in Palestine. HSOPSC is an appropriate cross-cultural  
7 instrument for patient safety culture.  
8  
9  
10  
11  
12

### 13 14 15 **Strengths and limitations of this study**

- 16 • Our study enables us to draw conclusions regarding the varying associations among  
17 HSOPSC patient safety culture dimensions and self-reported patient safety outcomes  
18 across different cultural settings.  
19
- 20 • This is the first study to explore the predictive value of HSOPSC in a matched sample  
21 of two different countries.  
22
- 23 • Using matched samples design is useful, allowing researchers to maintain a good  
24 degree of validity and to achieve rationalized and focused research question.  
25
- 26 • However, our results attest the international and cross-cultural validity of the  
27 HSOPSC; more studies are needed to provide further evidence in this regard.  
28
- 29 • Our study exclusively relied on subjective self-reported measures; future research on  
30 linking objective actual adverse events data with safety culture dimensions would be  
31 better to clarify the direction of this relation.  
32  
33  
34  
35  
36  
37  
38  
39  
40  
41  
42  
43  
44  
45  
46  
47  
48  
49  
50  
51  
52  
53  
54  
55  
56  
57  
58  
59  
60

## Background

Patient safety is a major focus in the improvement of healthcare quality [1-3]. This has led to an increased interest in patient safety culture assessments in healthcare organizations [4]. Clinical outcomes and adverse event rates have been used as indicators for patient safety in previous studies [5]. Earlier research has demonstrated a link between organizational culture, outcomes and adverse event rates [6-8], financial performance [9] and patient satisfaction [10]. The development of a positive safety culture may help to integrate the concern for safety into the daily functioning of organizations and into the routines of individuals and teams [6]. In this study, safety culture is viewed as the presence of values, beliefs, norms, behaviors and attitudes that may contribute to patient safety [11]. Hospitals that invest in patient safety culture may enable staff not only to prevent and solve safety problems, but to learn collectively from problems that occur at the frontline of care delivery [8,12,13]. Several studies have highlighted the perception of patient safety and staff attitudes toward safety [14-16]. Others have reported on the psychometric evaluation of safety culture tools [17-21]. A range of tools has been developed to measure safety culture; for example, patient safety cultures in healthcare organizations, hospital surveys on patient safety and safety attitude questionnaires [22,23]. These instruments can elicit patient safety-related assessments from healthcare staff at (1) a hospital level, (2) a unit level and (3) a professional level [16,24]. The original American Hospital Survey on Patient Safety Culture (HSOPSC) was released by the Agency for Healthcare Research and Quality in November 2004. The survey is one of the most applied instruments for the assessment of patient safety culture. Moreover, it has been widely translated and validated in several languages and countries, including Belgium, England, Norway, Scotland, the Netherlands and Palestine [17-21]. The survey is intended to help hospitals assess the extent to which their cultures emphasize the importance of patient safety, encourage error reporting and the open discussion of error, and create an atmosphere

1  
2  
3 of continuous learning and improvement. It combines 10 different dimensions that are  
4  
5 expected to have a favorable impact on four self-reported patient safety outcomes [14,17].

6  
7 Despite efforts to measure safety culture in terms of dimensions and outcomes to improve  
8  
9 patient safety, few studies have examined the specific predictive value of the dimensions in  
10  
11 terms of HSOPSC outcomes [25]. Research to date has not detailed the relationships between  
12  
13 the HSOPSC safety culture dimensions and its self-reported outcome measures across  
14  
15 countries. In Belgium and Palestine, the governments promote the HSOPSC instrument as a  
16  
17 tool to support the development of patient safety interventions or initiatives at hospitals. Both  
18  
19 governments have called for further insight regarding the tool's prevention qualities within  
20  
21 and between different cultural contexts [15]. Based on these arguments, the first aim of this  
22  
23 study was to test which HSOPSC safety culture dimensions are associated with self-reported  
24  
25 outcome measures. Second, we aim to investigate whether the cultural context impacts on  
26  
27 these associations. These findings offer further insight into the similarities and differences  
28  
29 regarding associations between the dimensions and outcomes of hospital workers in two very  
30  
31 different cultural settings. The results also further attest to the value of the HSOPSC to  
32  
33 increase patient safety in a range of settings.  
34  
35  
36  
37

## 38 **Method**

### 39 **Design, setting and sample**

40  
41  
42 A cross-sectional study design was used. In total, 90 acute Belgian hospitals and 13  
43  
44 Palestinian hospitals were included in the study. In Belgium, workshops were organized for  
45  
46 participating hospitals in which the objectives and survey were explained. The Dutch and  
47  
48 French validated versions of HSOPSC were distributed organization-wide to 90 acute  
49  
50 hospitals that participated in a federal patient safety program between 2007 and 2009  
51  
52 (baseline safety culture measurement [15]). The 90 hospitals comprised 58 Dutch-speaking  
53  
54  
55  
56  
57  
58  
59  
60



1  
2  
3 hospitals, 31 French-speaking hospitals and one that was both Dutch- and French-speaking. In  
4 total, 68 hospitals used a paper-based survey, 15 used an electronic survey and seven applied  
5 a mixed method for survey administration. Technical assistance was available during the  
6 periods of data collection. Hospitals were invited to participate in a Belgian comparative  
7 research on a voluntary, confidential and free of charge basis. A total of 91,852 questionnaires  
8 were distributed and 47,648 were returned (response rate of 51.9%). The comparative  
9 database was managed by a neutral academic institution and was not accessible by  
10 governmental authorities.  
11

12  
13  
14  
15  
16  
17  
18  
19  
20 In Palestine, safety culture baseline data were collected from September 2010 to August 2011  
21 in 13 hospitals: 11 public hospitals and two general non-governmental hospitals situated in  
22 the West Bank. All hospitals were Arabic-speaking and used a paper-based Arabic validated  
23 survey. Workshops were organized at the participating hospitals to explain the objectives and  
24 survey. A paper version of the questionnaire was distributed and participants were informed  
25 about the purpose of the study. They were also told that their participation was anonymous,  
26 voluntary and confidential. Technical assistance was accessible during the periods of data  
27 collection. A total of 3,153 questionnaires were distributed and 1,690 were returned (response  
28 rate of 53.6%), of which 1,418 could be used for this study. The collected database was  
29 managed by an independent academic institution. There are no funders to report for this  
30 submission.  
31  
32  
33  
34  
35  
36  
37  
38  
39  
40  
41  
42

43  
44 In both samples the survey was distributed anonymously to all healthcare staff that had direct  
45 (physicians, nurses, clinical staff, pharmacists, radiology staff and laboratory staff) or indirect  
46 (all hospital supervisors, managers, administrators, and support and administrative staff)  
47 interaction with patients.  
48  
49  
50

51  
52 For the purposes of this study, the Belgian sample was matched to the Palestinian sample by  
53 selecting a matched subsample based on staff position, years of experience at the hospital and  
54  
55  
56  
57

1  
2  
3 number of hours worked per week. Specifically, we used the Palestinian set (N = 1,418) to  
4 randomly (blind) select 1:1 matching participants regarding position, tenure and working  
5 hours from the Belgian sample. When more than one matching participant could be identified,  
6 we randomly (blind) selected one of the participants that fitted the criteria.  
7  
8

9  
10 The Belgian and Palestinian samples consisted of a total of 2,836 healthcare staff (1,418  
11 respondents from each country). The subsample comprised the following staff categories:  
12 nurses (38.6%), head nurses (9.4%), nursing aid staff (5.7%), physicians (17.9%), pharmacists  
13 (2.9%) and other healthcare staff (25.5%). The size of the sample hospitals ranged from small  
14 (less than 150 beds) to large (more than 200 beds). The research was fully supported and  
15 ethically approved by the governments' departments of health, and all the hospitals  
16 approached participated in our study.  
17  
18  
19  
20  
21  
22  
23  
24  
25  
26

### 27 **Instrument and measures**

28  
29 The HSOPSC consists of 42 items and is designed to measure 10 safety culture dimensions  
30 and four outcome measures. Items are scored on a 5-point Likert scale ranging from 1 =  
31 'strongly disagree' to 5 = 'strongly agree' or from 1 = 'never' to 5 = 'always'. Respondents  
32 were also asked to provide some demographic information (e.g., their work area/unit, staff  
33 position, whether they have direct interaction with patients) [14]. Safety culture dimensions  
34 and self-reported outcomes are shown in Table 1.  
35  
36  
37  
38  
39  
40  
41

42 Using the matched samples from both countries, the relations between all dimensions and  
43 outcomes of the HSOPSC were assessed. Five-point response scales were used (1=strongly  
44 disagree to 5=strongly agree).  
45  
46  
47  
48

49 *Independent variables:* For both samples, the safety culture dimensions mentioned in Table 1  
50 were used. All dimensions consist of multiple items.  
51  
52  
53  
54  
55  
56  
57  
58  
59  
60

1  
2  
3 *Dependent variables:* Four self-reported outcome measures were used as dependent variables  
4 (Table 1). Two composite outcomes have multiple items. Patient safety grade and number of  
5 events are single-item measures.  
6  
7

8  
9 *Control variables:* The following controls were measured in both samples and were included  
10 in all analyses: staff position, years of working experience at the hospital and number of hours  
11 worked per week.  
12  
13  
14

### 15 16 **Statistical analysis**

17  
18 First, we conducted exploratory factor analyses (EFA) using the Palestinian and matched  
19 Belgian data to test whether we could detect the same dimension structure in both samples.  
20 We aimed for acceptable levels of reliability (Cronbach's  $\alpha \geq 0.60$ ) as recommended in the  
21 HSOPSC user guide [26]. Based on EFA analyses, we distinguished eight safety dimensions  
22 and two outcome dimensions in both the Palestinian and Belgian data (Table 2). The other  
23 two outcome measures were single items: patient safety grade and number of events reported.  
24 Cronbach's alpha values for both the Palestinian and Belgian databases are presented in  
25 Table2.  
26  
27  
28  
29  
30  
31  
32  
33  
34  
35

36 Second, we conducted hierarchical regression analyses for both the Palestinian and Belgian  
37 samples using IBM SPSS version 20.0 (SPSS Inc., Chicago, IL, USA). A composite average  
38 score was created calculating the average responses to the items within a dimension. As 5-  
39 point response scales were used, the composite scores were any value between 1 and 5.  
40 Regression analyses were conducted to determine the extent to which the safety culture  
41 dimensions predicted the four self-reported dimensions. Multiple R ( $R^2$ ) was used to indicate  
42 the proportion of variance explained by the model. An indication of the predictive value of the  
43 safety culture dimensions was confirmed using standardized beta values ( $\beta$ ), which provide  
44 better insight into the 'importance' of each predictor in the model and its contribution in  
45  
46  
47  
48  
49  
50  
51  
52  
53  
54  
55  
56  
57  
58  
59  
60

1  
2  
3 predicting the outcome measures. The following controls were used in all regression analyses:  
4  
5 experience at hospital (years), working hours (hours) and staff position.  
6  
7

### 8 **Ethical approval**

9  
10 To ensure the privacy of the respondents, the survey was conducted anonymously. The  
11  
12 researchers obtained ethical approval from the governments' departments of health and  
13  
14 institutional permits from the participated hospitals. Formal ethical approval and patient  
15  
16 consent form were not necessary for this type of study.  
17  
18

### 19 **Results**

#### 20 **Participants' characteristics**

21  
22  
23 Most participants were nurses 761 (53.7%) and 254 (17.9%) were physicians. Most of the  
24  
25 participants had between 1 and 5 years of experience in their current work unit. Details on the  
26  
27 matched sample and participants' characteristics for both Palestinian and Belgian respondents  
28  
29 are described in Table 3.  
30  
31  
32  
33  
34

#### 35 **Correlation between dimensions and outcomes of HSOPSC**

36  
37 Table 4 presents the results of two correlation tables; namely, Palestinian correlations shown  
38  
39 below the diagonal and Belgian correlations above. Preliminary Pearson correlation analyses  
40  
41 (Table 4) revealed some differences between the Palestinian and Belgian samples. The  
42  
43 analyses showed significant positive correlations for overall perceptions of patient safety with  
44  
45 all dimensions in both samples. Regarding frequency of event reporting, the data also showed  
46  
47 a positive correlation with all dimensions in both samples. However, in the Belgian sample,  
48  
49 no correlation was found between staffing and frequency of events. In both samples, most  
50  
51 dimensions had a positive association with overall grade for patient safety. Regarding the  
52  
53 number of events reported, the Palestinian sample had a significant and negative relationship  
54  
55  
56  
57  
58  
59  
60

1  
2  
3 with four dimensions: supervisor/manager expectations and actions promoting safety, non-  
4  
5 punitive response to error, staffing and teamwork across hospital units and hospital handoffs  
6  
7 and transitions. The negative correlation means that an inverse relationship exists between  
8  
9 two variables; when one variable increases that the other one will be decreases. This was also  
10  
11 the case for the Belgian sample, with the number of events reported found to be associated  
12  
13 with teamwork within hospital units, organizational learning–continuous improvement,  
14  
15 support from hospital management for patient safety, staffing and teamwork across hospital  
16  
17 units and during hospital handoffs and transitions. All correlations were negative except for  
18  
19 organizational learning.  
20  
21

### 22 23 **Hierarchical regression analyses**

24  
25 Regression analyses were used to investigate the predictive value of the safety culture  
26  
27 dimensions regarding the four self-reported outcome measurements. General results are  
28  
29 discussed below. To follow the detailed results please see Table 5.  
30  
31

#### 32 *Overall perceptions of safety (OPS)*

33  
34 The safety dimensions explained 16% and 36% of the variance of overall perceptions of  
35  
36 safety (OPS) in Palestine and Belgium respectively. OPS outcome was predicted in both  
37  
38 countries by teamwork within hospital units, organizational learning–continuous  
39  
40 improvement, supervisor/manager expectations and actions promoting safety, support from  
41  
42 hospital management for patient safety, teamwork across hospital units and during hospital  
43  
44 handoffs and transitions, and feedback and communication openness regarding errors. The  
45  
46 standardized beta values ( $\beta$ ) was ranged between 0.06 – 0.24 ( $p$ -value;  $<0.05$  –  $<0.001$ ).  
47  
48 Adding to the above mentioned predictors for OPS staffing was a predictor for Belgian  
49  
50 sample only ( $\beta = 0.24, p < 0.001$ ).  
51  
52

#### 53 *Frequency of events reporting (FER)*

1  
2  
3 In Palestine and Belgium, the safety dimensions explained 22% and 18% of the variance of  
4 frequency of event reporting (FER) outcome respectively. This outcome was predicted by  
5 teamwork across hospital units and during hospital handoffs and transitions, staffing, and  
6 feedback and communication openness regarding errors with  $\beta$ -value between 0.06 – 0.35 ( $p$ -  
7 value;  $<0.05$  –  $<0.001$ ). Organizational learning–continuous improvement ( $\beta=0.14$ ,  $p<0.001$ ),  
8 and hospital management support for patient safety ( $\beta=0.10$ ,  $p < 0.001$ ) were additional good  
9 predictors for the Palestinian sample.  
10  
11

#### 12 *Overall grade on patient safety (OGPS)*

13  
14 20% of the OGPS was predicted by safety dimensions in Palestine and 33% in Belgium. The  
15 results revealed two similar predictors between the two countries namely; supervisor/manager  
16 expectations and actions promoting safety and teamwork across hospital units and during  
17 hospital handoffs and transitions with  $\beta$ -value between 0.12 - 0.17 ( $p<0.001$ ). In addition to  
18 the mentioned predictors above, organizational learning–continuous improvement ( $\beta = 0.19$ ,  $p$   
19  $< 0.001$ ), non-punitive response to error ( $\beta = 0.09$ ,  $p < 0.001$ ) were significant predictors for  
20 OGPS in Palestine. And, teamwork within hospital units ( $\beta = 0.11$ ,  $p < 0.001$ ), support from  
21 hospital management for patient safety ( $\beta = 0.17$ ,  $p < 0.001$ , staffing ( $\beta = 0.19$ ,  $p < 0.001$ ) and  
22 feedback and communication openness regarding errors ( $\beta = 0.15$ ,  $p < 0.001$ ) in Belgium.  
23  
24  
25  
26  
27  
28  
29  
30  
31  
32  
33  
34  
35  
36  
37  
38

#### 39 *Number of events reported (NER)*

40  
41 The dimensions predicted only 1% of the NER in Palestine and 5% in Belgium. Supervisor  
42 actions promoting safety and Communication openness regarding errors were good predictors  
43 in both countries ( $\beta$  between 0.05 - 0.16,  $p<0.05$  -  $p<0.001$ ). In Palestine, non-punitive  
44 response to error ( $\beta = -0.08$ ,  $p < 0.01$ ), and staffing ( $\beta = -0.20$ ,  $p < 0.001$ ) were also predictors  
45 for NER. Moreover, teamwork within hospital units ( $\beta = -0.07$ ,  $p < 0.05$ ), organizational  
46 learning–continuous improvement ( $\beta = 0.09$ ,  $p < 0.01$ ), hospital management support for  
47  
48  
49  
50  
51  
52  
53  
54  
55  
56  
57  
58  
59  
60

1  
2  
3 patient safety ( $\beta = -0.07, p < 0.05$ ), and teamwork across hospital units and during hospital  
4  
5 handoffs and transitions ( $\beta = -0.08, p < 0.01$ ) were predictors in Belgium.  
6  
7

## 8 **DISCUSSION**

9

10 This study enabled us to draw conclusions regarding the extent that each HSOPSC safety  
11  
12 dimension specifically contributes to outcome dimensions. It is the first study to explore the  
13  
14 predictive value of HSOPSC in a matched sample of two different countries. As such, it  
15  
16 provides information about (a) the impact of the various safety culture dimensions on patient  
17  
18 safety outcomes and (b) cross-cultural differences in this respect between Palestinian and  
19  
20 Belgian hospitals. Thus, our research furthers the understanding regarding the influence of  
21  
22 initiatives to improve specific outcome measures and thereby patient safety. Overall, our  
23  
24 findings emphasize that the HSOPSC is a valid survey instrument to improve outcomes  
25  
26 related to safe healthcare for patients. The study results demonstrate that at least two of the  
27  
28 HSOPSC dimensions contribute to one of the self-reported outcome measures in each  
29  
30 country. Thus, our findings attest to the value of the dimensions regarding patient safety  
31  
32 outcomes. Only one dimension, non-punitive response to error, was found to have no  
33  
34 association with any of the outcome measures in Belgium. A possible explanation could be  
35  
36 that this dimension has a low internal consistency level and, therefore, it affected the  
37  
38 assessment of its predictive value in the Belgian sample. Despite this finding, every outcome  
39  
40 measure was found to have an association with at least two HSOPSC dimensions in the  
41  
42 Palestine and Belgium samples. Only a small number of differences were detected between  
43  
44 both samples.  
45  
46  
47  
48

49 The results for both the Palestine and Belgium samples showed that hospitals should focus on  
50  
51 investing in interventions that enable feedback and enhance communication openness  
52  
53 regarding errors, sustain teamwork within and across hospital units, maintain organizational  
54  
55 learning–continuous improvement, and improve hospital handoffs and transitions. These  
56  
57  
58  
59  
60

1  
2  
3 interventions will improve perceptions of OPS. As such, our analyses and results explicitly  
4  
5 reveal 'important' dimensions in view of safety outcomes, and these dimensions are shown to  
6  
7 be the same for both Palestinian and Belgian hospitals. Under such circumstances,  
8  
9 implementing strategies and tools such as TeamSTEPPS may improve teamwork [26]. This  
10  
11 tool not only improves teamwork within and across units, but it also strengthens  
12  
13 communication and feedback skills regarding errors and can enable the establishment of a  
14  
15 learning system based on previous mistakes.  
16

17  
18 Event reporting is fundamental to detect patient safety problems and represents a core  
19  
20 prerequisite of effective clinical risk management [25,27]. This outcome is of special  
21  
22 importance because these items tap into the frequency of the actual reporting of an act,  
23  
24 assessing the willingness to report unsafe events. The outcome indicates that a higher error  
25  
26 reporting rate leads to a stronger culture of accountability. The results showed, in both the  
27  
28 Palestine and Belgium samples, that this outcome is mainly influenced by maintaining open  
29  
30 lines of information and communication in the unit. These observations align with Pfeiffer  
31  
32 and Manser [25]. Moreover, improvements to staffing and teamwork may also influence this  
33  
34 outcome. Palestinian respondents found that managers who consider patient safety as a top  
35  
36 priority and build constructive learning systems based on previous mistakes encourage their  
37  
38 staff to report adverse events. This result is also commonly reported in the published literature  
39  
40 [1,27].  
41  
42

43  
44 The overall grade for patient safety (OGPS), particularly in building a constructive learning  
45  
46 system based on previous mistakes in Palestine and improving staffing levels in Belgium, was  
47  
48 found to be significant. In other words, although our results showed many similarities  
49  
50 between the matched set of Palestinian and Belgian healthcare professionals, we also found  
51  
52 cultural differences regarding OGPS. Consistent with previous studies, having enough  
53  
54 staffing [28] and learning opportunities from previous mistakes [6] increased the likelihood of  
55  
56  
57  
58  
59  
60



1  
2  
3 staff reporting good or excellent safety grades in Belgium. Other contributing dimensions are  
4  
5 maintaining manager expectations and actions in promoting safety, improving teamwork  
6  
7 across hospital units and supporting hospital handoffs and transitions in both countries. In  
8  
9 Palestine, our study also revealed that a higher score on OGPS relates to greater support  
10  
11 regarding non-punitive response to error. Additionally, initiatives to improve teamwork  
12  
13 within units, support from hospital management for patient safety, staffing and feedback and  
14  
15 communication openness regarding errors may also act to advance OGPS in Belgium.  
16

17  
18 As safety culture dimensions only explained 1% (Palestine) and 5% (Belgium) of number of  
19  
20 events reporting (NER), influencing safety culture dimensions will have less impact on  
21  
22 patient safety outcomes compared with other outcome dimensions ( $R^2_{\text{OPS-Palestine}} = 16\%$ ;  $R^2_{\text{OPS-}}$   
23  
24  $\text{Belgium} = 36\%$ ;  $R^2_{\text{FER-Palestine}} = 22\%$ ;  $R^2_{\text{FER-Belgium}} = 18\%$ ;  $R^2_{\text{OGPS-Palestine}} = 20\%$ ;  $R^2_{\text{OGPS-Belgium}} =$   
25  
26  $33\%$ ). As such, the HSOPSC seems to work particularly well in predicting OPS, FER, and  
27  
28 OGPS, and in both the Belgian and Palestinian samples. A possible explanation for why NER  
29  
30 is less well explained through the safety dimensions could be that the HSOPSC safety  
31  
32 dimensions have a broad scope regarding patient safety and, consequently, work less well for  
33  
34 this very specific outcome. A further explanation could be that our results stem not from a low  
35  
36 predictive value, but from the underreporting of adverse events. Underreporting would then  
37  
38 result in a low mean and low variance regarding this outcome dimension. Table 2 does indeed  
39  
40 indicate a low mean regarding this dimension ( $M_{\text{Palestine}} = 1.89$ ;  $M_{\text{Belgium}} = 2.26$ ), yet does not  
41  
42 reveal low variance in terms of respondents' replies ( $SD_{\text{Palestine}} = 1.27$ ;  $SD_{\text{Belgium}} = 1.22$ ). A  
43  
44 final explanation could be that respondents found it difficult to answer this question based on  
45  
46 experience, as they may not themselves know how many events have been reported.  
47  
48 Therefore, hospitals seeking to invest in patient safety must not only measure NER, they  
49  
50 should also link the safety dimensions to objective measurements of NER.  
51  
52  
53  
54  
55  
56  
57  
58  
59  
60

1  
2  
3 To summarize, our results suggest that improved self-reported outcome measures regarding  
4 patient safety in both Palestine and Belgium are more likely to be achieved through better  
5 teamwork across units and during hospital handoffs and transitions, encouraging feedback and  
6 communications regarding errors, and implementing actions to promote safety. Furthermore,  
7 improving teamwork within hospital units, providing a work climate that promotes safety as a  
8 top priority of hospital management and resolving staffing problems will also influence most  
9 outcome measures in Belgium [29,30]. In Palestine, bringing errors to the attention of  
10 managers and other staff and using mistakes as valuable learning opportunities [3] may also  
11 have an impact on safety outcome measures.  
12  
13  
14  
15  
16  
17  
18  
19  
20  
21  
22

### 23 **Limitations and future research**

24  
25 The current study has some methodological limitations that should be addressed. First, the  
26 study used a cross-sectional design; therefore, claims of causal relationships are not possible.  
27  
28 Second, as the present study exclusively relied on subjective measures that reflect the  
29 willingness of respondents to report events, and more specifically, the reporting of near  
30 misses, the results may be contaminated by the common method bias of these self-reported  
31 outcome measures. Future research should examine the relationship between HSOPSC  
32 dimensions and actual adverse events rates to clarify the direction of this relation by linking  
33 objective data with safety culture dimensions. Nevertheless, this study is the first to provide  
34 further insight regarding the value of the HSOPSC in terms of (a) the impact of the safety  
35 culture dimensions on patient safety outcomes and (b) in different cultural settings. Third, the  
36 associations between the safety and outcome dimensions of the HSOPSC were investigated  
37 using a matched sample (to rule out possible bias because of the sample differences between  
38 the two countries) using linear regression analyses. However, we cannot exclude the  
39 limitation of this design. The design uses the most influential variables, which are in fact  
40 approximations from the researchers' perspective. These assumptions might be incorrect and  
41  
42  
43  
44  
45  
46  
47  
48  
49  
50  
51  
52  
53  
54  
55  
56  
57  
58  
59  
60

1  
2  
3 could lead to major confounding variables. Despite these methodological restrictions,  
4  
5 previous research has shown that matched samples designs are useful, allowing researchers to  
6  
7 perform streamlined and focused research programs whilst maintaining a good degree of  
8  
9 validity [31]. Another possible concern is that as most respondents were nurses and other  
10  
11 health professionals, the results may reflect their own perceptions and thus affect our  
12  
13 association results. However, we should not forget that nurses are the most represented  
14  
15 staffing group in hospitals, and that our sample also included physicians, pharmacists,  
16  
17 administrative and quality and safety staff. Finally, the Cronbach's alpha values for some of  
18  
19 the composite scores measuring patient safety culture were low ( $\alpha < 0.70$ ). Low scores may  
20  
21 affect the correlation results, as in the Palestinian sample where all dimensions were  
22  
23 positively associated with the OGPS (except staffing). This specific dimension has shown a  
24  
25 low internal consistency in most psychometrics evaluation studies of HSOPSC [26,32]. It  
26  
27 seems necessary to review and update the items of this dimension to improve its internal  
28  
29 consistency. Our results further attest to the international and cross-cultural validity of the  
30  
31 HSOPSC. Future research could, however, investigate the relationships between the safety  
32  
33 and outcome dimensions in other countries to provide further evidence in this regard.  
34  
35  
36  
37

## 38 **Conclusion**

39  
40 Patient safety should be a priority in healthcare systems. Investment in several patient safety  
41  
42 culture dimensions would be a worthwhile endeavor to improve the culture of patient safety in  
43  
44 hospitals. We found that interventions to improve staffing and feedback and communication  
45  
46 regarding errors were the more powerful initiatives to improve patient safety culture outcomes  
47  
48 in both countries. Furthermore, interventions from hospital management that actively support  
49  
50 safety and the building of constructive learning systems based on previous mistakes should  
51  
52 improve perceptions of safety in Palestinian hospitals. As there were only a few differences  
53  
54 between the Belgian and Palestinian samples, we conclude that HSOPSC can be considered  
55  
56  
57  
58  
59  
60

1  
2  
3 an international and cross-cultural instrument. The differentiations that exist mainly concern  
4  
5 which dimensions have a greater influence on specific outcomes than others.  
6  
7  
8  
9  
10  
11  
12  
13  
14  
15  
16  
17  
18  
19  
20  
21  
22  
23  
24  
25  
26  
27  
28  
29  
30  
31  
32  
33  
34  
35  
36  
37  
38  
39  
40  
41  
42  
43  
44  
45  
46  
47  
48  
49  
50  
51  
52  
53  
54  
55  
56  
57  
58  
59  
60

**List of abbreviations**

|                   |                                                                      |
|-------------------|----------------------------------------------------------------------|
| AHRQ              | Agency for healthcare research and quality                           |
| $\beta$           | Standardized beta values                                             |
| FB&ComE           | Feedback and communication openness about errors                     |
| FER               | Frequency of event reporting                                         |
| HMS               | Hospital management support for patient safety                       |
| HSOPSC            | Hospital survey on patient safety culture                            |
| NER               | Number of events reported                                            |
| NPRE              | Non-punitive response to error                                       |
| OGPS              | Overall grade of patient safety                                      |
| OPS               | Overall perceptions of safety                                        |
| OrgLearn          | Organizational learning–continuous improvement                       |
| Staff             | Staffing                                                             |
| Sup./Man._actions | Supervisor/manager expectations and actions promoting safety         |
| TW _units         | Teamwork within hospital units                                       |
| TWacross_HHT      | Teamwork across hospital units and hospital handoffs and transitions |

**Competing interests**

The authors declare that they have no competing interests.

**Authors' contributions**

SN performed the overall statistical analyses and drafted the manuscript. EB actively contributed to the statistical analyses, the interpretation of the results, and to the manuscript.

MH coordinated data collection (Palestine) and critically revised the manuscript. AVle and

1  
2  
3 ME participated in critically revising the manuscript for important intellectual content. WSer  
4  
5 and WSch participated in the analyses and interpretation of the data, and contributed to the  
6  
7 manuscript. KV and JH were involved in the study design and revised the manuscript  
8  
9 critically. JH coordinated the data collection (Belgium). AVla was involved in the study  
10  
11 design, manuscript outline, and contributed to the manuscript and data preparation (Belgian  
12  
13 data). All authors have read and approved the final manuscript.  
14  
15

### 16 **Acknowledgements**

17  
18 We particularly acknowledge all participant hospitals and their staff who devoted time to  
19  
20 completing the surveys. We extend our gratitude to the Palestinian and Belgian governments  
21  
22 for their cooperation and supporting this research.  
23  
24  
25  
26  
27  
28  
29  
30  
31  
32  
33  
34  
35  
36  
37  
38  
39  
40  
41  
42  
43  
44  
45  
46  
47  
48  
49  
50  
51  
52  
53  
54  
55  
56  
57  
58  
59  
60

## References

1. Schwendimann R, Zimmermann N, Küng K, et al. **Variation in safety culture dimensions within and between US and Swiss Hospital Units: an exploratory study.** *BMJ Qual Saf*. 2013; **22**(1):32-41.
2. Donaldson LJ, Fletcher MG. **The WHO World Alliance for Patient Safety: towards the years of living less dangerously.** *Med J Aust* 2006; **184**:S69e72.
3. Najjar S, Hamdan M, Euwema MC, et al. **The Global Trigger Tool shows that one out of seven patients suffers harm in Palestinian hospitals: challenges for launching a strategic safety plan,** *Int J Qual Health Care* 2013; **25**:640–647, <https://doi.org/10.1093/intqhc/mzt066>.
4. Institute of Medicine. **To err is human: Building a safer health system.** Washington, D.C: *The National Academy press*, 2000.
5. Wakefield JG, Jorm CM. **Patient safety a balanced measurement framework.** *Aust Health Rev* 2009; **33** (3):382-9.
6. Stone PW, and Gershon PR. **Nurse Work Environments and Occupational Safety in Intensive Care Units.** *J Nurs Adm* 2009; **39**(7-8 Suppl):S27-34
7. Mardon RE, Khanna K, Sorra J, et al. **Exploring relationships between hospital patient safety culture and adverse events.** *J Patient Saf* 2010; **6**:226-32.
8. Singer S, Lin S, Falwell A, et al. **Relationship of safety climate and safety performance in hospitals.** *Health Serv Res* 2009; **44**:399-421.
9. Kotter JP, and Heskett JL. **Corporate Culture and Performance.** *New York: Free Press.*
10. Carman JM, Shortell SM, Foster RW, et al. **Keys for Successful Implementation of Total Quality Management in Hospitals.** *Health Care Manage Rev.* 2010; **35**(4):283-93

- 1  
2  
3 11. Institute of Medicine. **Crossing the Quality Chasm: A New Health System for the**  
4  
5 **21st Century.** *Washington, DC: National Academy Press.*
- 6  
7 12. Edmondson AC. **Psychological Safety and Learning Behavior in Work Teams.**  
8  
9 *Administrative Science Quarterly* 1999;**44** (2): 350–83.
- 10  
11 13. Hansen LO, Williams MV, and Singer SJ. **Perceptions of Hospital Safety Climate**  
12  
13 **and Incidence of Readmission.** *Health Serv Res* 2011;**46**(2):596-616.
- 14  
15 14. Sorra J, Famolaro T, Dyer N, et al. Hospital Survey on Patient Safety Culture: 2012  
16  
17 User Comparative Database Report. Prepared by Westat, Rockville, MD, under  
18  
19 Contract No. HHSA 290200710024C. AHRQ Publication No. 12-0017, January 2012.  
20  
21 Agency for Healthcare Research and Quality, Rockville, MD.  
22  
23 <http://www.ahrq.gov/qual/hospsurvey12/index.html>  
24  
25
- 26  
27 15. Vlayen A, Hellings J, Claes N, Peleman H, Schrooten W. **A nationwide Hospital**  
28  
29 **Survey on Patient Safety Culture in Belgian hospitals: setting priorities at the**  
30  
31 **launch of a 5-year patient safety plan.** *BMJ Qual Saf* 2012;**21**(9):760-7.
- 32  
33 16. Deilkas E, Hofoss D. **Patient safety culture lives in departments and wards:**  
34  
35 **multilevel partitioning of variance in patient safety culture.** *BMC Health Serv Res*  
36  
37 2010;**10**:85.
- 38  
39 17. Sorra J, & Dyer N: **Multilevel psychometric properties of the AHRQ hospital**  
40  
41 **survey on patient safety culture.** *BMC Health Serv Res* 2010;**10**:199.
- 42  
43 18. Waterson PE, Griffiths P, Stride C, et al. **Psychometric properties of the hospital**  
44  
45 **survey on patient safety culture: findings from the UK.** *Qual Saf Health Care*  
46  
47 2010; **19**:e2. doi:10.1136/qshc.2008.031625.
- 48  
49 19. Sarac C, Flin R, Mearns K, et al. **Hospital survey on patient safety culture:**  
50  
51 **psychometric analysis on a Scottish sample.** *Qual Saf Health Care* 2011;  
52  
53 **20**(10):842-8.  
54  
55  
56  
57  
58  
59  
60



- 1  
2  
3  
4  
5  
6  
7  
8  
9  
10  
11  
12  
13  
14  
15  
16  
17  
18  
19  
20  
21  
22  
23  
24  
25  
26  
27  
28  
29  
30  
31  
32  
33  
34  
35  
36  
37  
38  
39  
40  
41  
42  
43  
44  
45  
46  
47  
48  
49  
50  
51  
52  
53  
54  
55  
56  
57  
58  
59  
60
20. Olsen E. **Reliability and validity of the Hospital Survey on Patient Safety Culture at a Norwegian hospital.** In: Øvretveit J, Sousa P, eds. *Quality and Safety Improvement Research: Methods and Research Practice from the International Quality Improvement Research Network (QIRN)*. Lisbon: *National School of Public Health* 2008:173-86
  21. Najjar S, Hamdan M, Baillian E, et al. **The Arabic version of the hospital survey on patient safety culture: a psychometric evaluation in a Palestinian sample.** *BMC Health Serv Res* 2013; **13**:193. doi: 10.1186/1472-6963-13-193.
  22. Colla JB, Bracken AC, Kinney LM, et al. **Measuring patient safety climate: a review of surveys.** *Qual Saf Health Care* 2005; **14**:364–366.
  23. Sexton JB, Helmreich RL, Neilands TB, et al. **The Safety Attitudes Questionnaire: Psychometric Properties, Benchmarking Data, and Emerging Research.** *BMC Health Serv Res* 2006;**6**:44.
  24. Sammer CE, Lykens K, Singh KP, et al. **What is patient safety culture? A review of the literature.** *J Nurs Scholarsh* 2010;**42**(2):156–65.
  25. Pfeiffer Y, Manser T. **Development of the German version of the Hospital Survey on Patient Safety Culture: Dimensionality and psychometric properties.** *Safety Science* 2010; **48** (10):1452–1462.
  26. Sorra JS, Nieva VF. **Hospital Survey on Patient Safety Culture.** AHRQ Publication No. 04-0041. Rockville, MD: Agency for Healthcare Research and Quality; 2004.
  27. Westrum R, **A typology of organisational cultures.** *Qual Saf Health Care* 2004;**13** (Suppl. 2): pp. ii22–ii27.
  28. Aiken A, Sermeus W, Van den Heede K, et al. **Patient safety, satisfaction, and quality of hospital care: cross sectional surveys of nurses and patients in 12**

- 1  
2  
3 **countries in Europe and the United States.** *BMJ* 2012;**344**:e1717doi:  
4  
5 10.1136/bmj.e1717.  
6  
7 29. Keller SM. **Effects of extended work shifts and shift work on patient safety,**  
8  
9 **productivity, and employee health.** *AAOHN J* 2009;**57** (12):497–502  
10  
11 30. Mark BA, Harless DW and Berman WF. **Nurse Staffing and Adverse Events in**  
12  
13 **Hospitalized Children.** *Policy Polit Nurs Pract* 2007;**8**(2): 83-92.  
14  
15 31. Stuart EA. **Matching methods for causal inference: A review and a look forward.**  
16  
17 *Stat Sci* 2010;**25**(1): 1–21  
18  
19 32. El-Jardali F, Jafar M, Dimmasi H, et al. **The current state of patient safety culture**  
20  
21 **in Lebanese hospitals: a study at baseline.** *Int J Qual Health Care* 2010;**22**:386–95.  
22  
23  
24  
25  
26  
27  
28  
29  
30  
31  
32  
33  
34  
35  
36  
37  
38  
39  
40  
41  
42  
43  
44  
45  
46  
47  
48  
49  
50  
51  
52  
53  
54  
55  
56  
57  
58  
59  
60

**Table 1:** Definitions of patient safety culture dimensions and outcomes

| Safety culture dimensions                                                                                                                                                              | Items                                                                                                                                                                                                                                                                                                                                                                                     |
|----------------------------------------------------------------------------------------------------------------------------------------------------------------------------------------|-------------------------------------------------------------------------------------------------------------------------------------------------------------------------------------------------------------------------------------------------------------------------------------------------------------------------------------------------------------------------------------------|
| <p><b>Communication openness:</b> Staff freely speak up if they see something that may negatively affect a patient and feel free to question those with more authority</p>             | <ul style="list-style-type: none"> <li>• Staff will freely speak up if they see something that may negatively affect patient care.</li> <li>• Staffs feel free to question the decisions or actions of those with more authority.</li> <li>• Staffs are afraid to ask questions when something do not seem right.</li> </ul>                                                              |
| <p><b>Feedback and communication about error:</b> Staff are informed about errors that happen, given feedback about changes implemented, and discuss ways to prevent errors</p>        | <ul style="list-style-type: none"> <li>• We are given feedback about changes put into place based on event reports.</li> <li>• We are informed about errors that happen in this unit.</li> <li>• In this unit, we discuss ways to prevent errors from happening again.</li> </ul>                                                                                                         |
| <p><b>Hospital handoffs and transitions:</b> Important patient care information is transferred across hospital units and during shift changes</p>                                      | <ul style="list-style-type: none"> <li>• Things “fall between the cracks” when transferring patients from one unit to another.</li> <li>• Important patient care information is often lost during shift changes.</li> <li>• Problems often occur in the exchange of information across hospital units.</li> <li>• Shift changes are problematic for patients in this hospital.</li> </ul> |
| <p><b>Hospital management support for patient safety:</b> Hospital management provides a work climate that promotes patient safety and shows that patient safety is a top priority</p> | <ul style="list-style-type: none"> <li>• Hospital management provides a work climate that promotes patient safety.</li> <li>• The actions of hospital management show that patient safety is a top priority.</li> <li>• Hospital management seems interested in patient safety only after an adverse event happens.</li> </ul>                                                            |
| Safety culture dimensions                                                                                                                                                              | Items                                                                                                                                                                                                                                                                                                                                                                                     |
| <p><b>Non-punitive response to error:</b> Staff feel that their mistakes and event reports are not held against them and that</p>                                                      | <ul style="list-style-type: none"> <li>• Staffs feel like their mistakes are held against them.</li> <li>• When an event is reported, it feels like the person is being written up, not the problem.</li> </ul>                                                                                                                                                                           |

mistakes are not kept in their personnel file

- Staff worry that mistakes they make are kept in their personnel file.

**Organizational learning—Continuous improvement:** Mistakes have led to positive changes and changes are evaluated for effectiveness

- We are actively doing things to improve patient safety.
- Mistakes have led to positive changes here.
- After we make changes to improve patient safety, we evaluate their effectiveness.

**Staffing:** There are enough staff to handle the workload and work hours are appropriate to provide the best care for patients

- We have enough staff to handle the workload.
- Staff in this unit work longer hours than is best for patient care.
- We use more agency/temporary staff than is best for patient care.
- We work in “crisis mode,” trying to do too much, too quickly.

**Supervisor/manager expectations and actions promoting safety:** Supervisors/managers consider staff suggestions for improving patient safety, praise staff for following patient safety procedures, and do not overlook patient safety problems

- My supervisor/manager says a good word when he/she sees a job done according to established patient safety procedures.
- My supervisor/manager seriously considers staff suggestions for improving patient safety.
- Whenever pressure builds up, my supervisor/manager wants us to work faster, even if it means taking shortcuts.
- My supervisor/manager overlooks patient safety problems that happen over and over.

| Safety culture dimensions                                                                                                             | Items                                                                                                                                                                                                                                                                                                                                                                |
|---------------------------------------------------------------------------------------------------------------------------------------|----------------------------------------------------------------------------------------------------------------------------------------------------------------------------------------------------------------------------------------------------------------------------------------------------------------------------------------------------------------------|
| <b>Teamwork across hospital units:</b> Hospital units cooperate and coordinate with one another to provide the best care for patients | <ul style="list-style-type: none"> <li>• There is good cooperation among hospital units that need to work together.</li> <li>• Hospital units work well together to provide the best care for patients.</li> <li>• Hospital units do not coordinate well with each other.</li> <li>• It is often unpleasant to work with staff from other hospital units.</li> </ul> |

|                                                                                                                                    |                                                                                                                                                                                                                                                                                                                                               |
|------------------------------------------------------------------------------------------------------------------------------------|-----------------------------------------------------------------------------------------------------------------------------------------------------------------------------------------------------------------------------------------------------------------------------------------------------------------------------------------------|
| <p><b>Teamwork within hospital units:</b> Staff support each other, treat each other with respect, and work together as a team</p> | <ul style="list-style-type: none"> <li>• People support one another in this unit.</li> <li>• When a lot of work needs to be done quickly, we work together as a team to get the work done.</li> <li>• In this unit, people treat each other with respect.</li> <li>• When one area in this unit gets really busy, others help out.</li> </ul> |
|------------------------------------------------------------------------------------------------------------------------------------|-----------------------------------------------------------------------------------------------------------------------------------------------------------------------------------------------------------------------------------------------------------------------------------------------------------------------------------------------|

| Self-reported outcome measures | Items |
|--------------------------------|-------|
|--------------------------------|-------|

|                                                                                                                                                                                                                                                                       |                                                                                                                                                                                                                                                                                                                                                                                     |
|-----------------------------------------------------------------------------------------------------------------------------------------------------------------------------------------------------------------------------------------------------------------------|-------------------------------------------------------------------------------------------------------------------------------------------------------------------------------------------------------------------------------------------------------------------------------------------------------------------------------------------------------------------------------------|
| <p><b>Frequency of events reported:</b> Mistakes of the following types are reported: (1) mistakes caught and corrected before affecting the patient, (2) mistakes with no potential to harm the patient, and (3) mistakes that could harm the patient but do not</p> | <ul style="list-style-type: none"> <li>• When a mistake is made, but is caught and corrected before affecting the patient, how often is this reported?</li> <li>• When a mistake is made, but has no potential to harm the patient, how often is this reported?</li> <li>• When a mistake is made that could harm the patient, but does not, how often is this reported?</li> </ul> |
|-----------------------------------------------------------------------------------------------------------------------------------------------------------------------------------------------------------------------------------------------------------------------|-------------------------------------------------------------------------------------------------------------------------------------------------------------------------------------------------------------------------------------------------------------------------------------------------------------------------------------------------------------------------------------|

|                                                                                                                                                          |                                                                                                                                                                                                                                                                                                                                                |
|----------------------------------------------------------------------------------------------------------------------------------------------------------|------------------------------------------------------------------------------------------------------------------------------------------------------------------------------------------------------------------------------------------------------------------------------------------------------------------------------------------------|
| <p><b>Overall perceptions of patient safety:</b> Procedures and systems are good at preventing errors and there is a lack of patient safety problems</p> | <ul style="list-style-type: none"> <li>• Patient safety is never sacrificed to get more work done.</li> <li>• Our procedures and systems are good at preventing errors from happening.</li> <li>• It is just by chance that more serious mistakes don't happen around here.</li> <li>• We have patient safety problems in this unit</li> </ul> |
|----------------------------------------------------------------------------------------------------------------------------------------------------------|------------------------------------------------------------------------------------------------------------------------------------------------------------------------------------------------------------------------------------------------------------------------------------------------------------------------------------------------|

| Self-reported outcome measures | Items |
|--------------------------------|-------|
|--------------------------------|-------|

|                                                                                              |                                                                                                                                          |
|----------------------------------------------------------------------------------------------|------------------------------------------------------------------------------------------------------------------------------------------|
| <p><b>Patient safety grade:</b> Overall grade on patient safety for their work area/unit</p> | <ul style="list-style-type: none"> <li>• Please give your work area/unit in this hospital an overall grade on patient safety.</li> </ul> |
|----------------------------------------------------------------------------------------------|------------------------------------------------------------------------------------------------------------------------------------------|

|                                                                                                     |                                                                                                                                      |
|-----------------------------------------------------------------------------------------------------|--------------------------------------------------------------------------------------------------------------------------------------|
| <p><b>Number of events reported:</b> The number of events they reported over the past 12 months</p> | <ul style="list-style-type: none"> <li>• In the past 12 months, how many event reports have you filled out and submitted?</li> </ul> |
|-----------------------------------------------------------------------------------------------------|--------------------------------------------------------------------------------------------------------------------------------------|

**Table 2:** Dimensions and Cronbach's Alpha of HSOPSC in Palestine and Belgium

| OUTCOME MEASURES                                                               | Mean (SD)   | Mean            | Cronbach's                  | Cronbach's                |
|--------------------------------------------------------------------------------|-------------|-----------------|-----------------------------|---------------------------|
|                                                                                | Palestine   | (SD)<br>Belgium | alpha Palestine<br>Datasets | alpha Belgium<br>Datasets |
| Frequency of Event Reporting (FER)                                             | 3.09 (1.05) | 3.23 (0.96)     | 0.87                        | 0.86                      |
| Overall Perceptions of Safety (OPS)                                            | 3.35 (0.94) | 3.29 (0.75)     | 0.75                        | 0.73                      |
| <b>SAFETY CULTURE DIMENSIONS</b>                                               |             |                 |                             |                           |
| Supervisor/manager expectations & actions promoting safety (Sup./Man.actions)  | 3.32 (0.78) | 3.54 (0.68)     | 0.74                        | 0.74                      |
| Organizational Learning—Continuous improvement (OrgLearn)                      | 3.52 (0.84) | 3.39 (0.59)     | 0.73                        | 0.61                      |
| Feedback & Communication Openness about Errors (FB&ComE)                       | 3.32 (0.81) | 3.43 (0.72)     | 0.76                        | 0.80                      |
| Teamwork Within Hospital Units (TW_units)                                      | 3.76 (0.82) | 3.81 (0.69)     | 0.80                        | 0.79                      |
| No punitive Response To Error(NPRE)                                            | 2.33 (0.77) | 3.13 (0.75)     | 0.63                        | 0.69                      |
| Staffing (Staff)                                                               | 3.41 (0.88) | 2.99 (0.71)     | 0.67                        | 0.61                      |
| Hospital Management Support for Patient Safety (HMS)                           | 3.01 (0.95) | 3.09 (0.69)     | 0.76                        | 0.77                      |
| Teamwork Across Hospital Units & Hospital Handoffs & Transitions(TWacross_HHT) | 3.23 (0.81) | 2.95 (0.58)     | 0.78                        | 0.75                      |

Mean scores reported on scale 1–5, with 1= 'strongly disagree' to 5= 'strongly agree'

**Table 3:** Participants' characteristics

| Characteristics                            |                      | Whole Sample | Palestine Sample<br>N =1418 | Matched Belgian Sample<br>N = 1418 | Difference                      |
|--------------------------------------------|----------------------|--------------|-----------------------------|------------------------------------|---------------------------------|
| Direct contact or interaction with patient | Yes                  | 2524 (88.9%) | 1284 (90.5%)                | 1240 (87.4%)                       | $\chi^2 (1) = 6.972; p = .008$  |
|                                            | No                   | 312 (11.0%)  | 134 (9.4%)                  | 178 (12.5%)                        |                                 |
| Experience at current work area/unit       | <1year               | 452 (15.9%)  | 218 (15.4%)                 | 234 (16.5%)                        | $\chi^2 (5) = 16.879; p = .005$ |
|                                            | 1 to 5 years         | 1206 (42.5%) | 621 (43.8%)                 | 585 (41.3%)                        |                                 |
|                                            | 6 to 10 years        | 552 (19.5%)  | 250 (17.6%)                 | 302 (21.3%)                        |                                 |
|                                            | 11 to 15 years       | 281 (09.9%)  | 162 (11.4%)                 | 119 (8.4%)                         |                                 |
|                                            | 16 to 20 years       | 184 (06.5%)  | 81 (5.7%)                   | 104 (7.3%)                         |                                 |
|                                            | >21 years            | 160 (05.6%)  | 86 (6.1%)                   | 74 (5.2%)                          |                                 |
| Hospital size (beds)                       | Small (<150)         | 700 (24.7%)  | 612 (43.1%)                 | 88 (6.2%)                          | $\chi^2 (2) = 1370.8; p = .000$ |
|                                            | Medium (150 to 249)  | 632 (22.3%)  | 546 (38.5%)                 | 86 (6.1%)                          |                                 |
|                                            | Large ( $\geq 250$ ) | 1504 (53.0%) | 260 (18.4%)                 | 1244 (87.7%)                       |                                 |

**Table 4:** Correlation matrixes (Belgian sample above the diagonal, Palestinian sample below the diagonal)

|                              | 1     | 2     | 3     | 4     | 5     | 6      | 7      | 8      | 9      | 10     | 11    | 12     | 13    | 14     | 15     |
|------------------------------|-------|-------|-------|-------|-------|--------|--------|--------|--------|--------|-------|--------|-------|--------|--------|
| 1. Hospital years experience | –     | .03   | .05   | -.05  | .05*  | -.01   | -.03   | .02    | -.05   | -.09** | .01   | -.06*  | .04   | -.04   | .15**  |
| 2. Working hours             | .03   | –     | -.02  | .03   | -.03  | -.02   | .02    | -.10** | -.07** | -.11** | .01   | -.01   | -.03  | -.02   | .04    |
| 3. Staff position            | .05   | -.02  | –     | -.02  | -.04  | -.01   | .05    | .07**  | -.14** | .15**  | .00   | .09**  | -.05  | .06*   | .08**  |
| 4. TW_units                  | -.05  | .03   | .06*  | –     | .31** | .36**  | .36**  | .20**  | .24**  | .22**  | .44** | .30**  | .21** | .33**  | -.06*  |
| 5. OrgLearn                  | .01   | .05*  | .04   | .41** | –     | .43**  | .27**  | .31**  | .19**  | .13**  | .46** | .32**  | .24** | .25**  | .06*   |
| 6. Sup./Man_actions          | .01   | .04   | .05   | .24** | .27** | –      | .37**  | .36**  | .25**  | .27**  | .54** | .42**  | .24** | .38**  | -.05   |
| 7. NPRES                     | .03   | -.02  | .06*  | .08** | .08** | .13**  | –      | .27**  | .22**  | .30**  | .35** | .30**  | .19** | .25**  | -.00   |
| 8. HMS                       | -.01  | .08** | .05*  | .26** | .27** | .29**  | .26**  | –      | .35**  | .31**  | .35** | .42**  | .19** | .39**  | -.07** |
| 9. TWacross_HHT              | -.04  | .01   | .02   | .29** | .24** | .35**  | .22**  | .34**  | –      | .24**  | .27** | .29**  | .18** | .36**  | -.12** |
| 10. Staff                    | -.02  | -.00  | .02   | -.04  | -.04  | .13**  | -.11** | -.06*  | .02    | –      | .23** | .42**  | .05   | .37**  | -.08** |
| 11. FB&ComE                  | -.02  | .03   | .07** | .34** | .36** | .33**  | .17**  | .34**  | .27**  | -.04   | –     | .37**  | .41** | .40**  | .04    |
| 12. OPS                      | -.01  | .06*  | .04   | .25** | .26** | .28**  | .13**  | .27**  | .24**  | .02    | .25** | –      | .19** | .53**  | -.16** |
| 13. FER                      | .03   | .07** | .02   | .25** | .31** | .22**  | .13**  | .29**  | .29**  | .07*   | .38** | .23**  | –     | .21**  | .11**  |
| 14. OGPS                     | .10** | .15** | .03   | .20** | .31** | .28**  | .18**  | .23**  | .28**  | -.01   | .20** | .19**  | .23** | –      | -.13** |
| 15. NER                      | .01   | -.02  | .00   | .00   | -.04  | -.19** | -.07** | -.04   | -.10** | -.22** | -.01  | -.09** | .01   | -.10** | –      |

\*. Correlation is significant at the 0.05 level (2-tailed). \*\*. Correlation is significant at the 0.01 level (2-tailed).

**TW\_units:** Teamwork within hospital units, **OrgLearn:** Organizational learning—Continuous improvement, **Sup./Man\_actions:** Supervisor/manager expectations and actions promoting safety, **NPRES:** Non-punitive response to error, **HMS:** Hospital management support for patient safety, **TWacross\_HHT:** Teamwork across hospital units and hospital handoffs and transitions, **Staff:** Staffing, **FB&ComE:** Feedback and communication openness about error, **OPS:** Overall perceptions of patient safety, **FER:** Frequency of events reported, **OGPS:** overall grade of patient safety, **NER:** Number of events reported



**Table 5:** Summary of the hierarchical regression analyses: Predicting the outcomes of the HSOPC in matched samples of Palestinian and Belgian hospital workers ( $\beta$ )

| Outcome          | Palestine (N = 1418)                |        |                                     |        |                                        |        |                                 |         | Belgium (N = 1418)                  |        |                                     |        |                                        |        |                                 |        |
|------------------|-------------------------------------|--------|-------------------------------------|--------|----------------------------------------|--------|---------------------------------|---------|-------------------------------------|--------|-------------------------------------|--------|----------------------------------------|--------|---------------------------------|--------|
|                  | Overall perceptions of Safety (OPS) |        | Frequency of events reporting (FER) |        | Overall grade on patient safety (OGPS) |        | Number of events reported (NER) |         | Overall perceptions of Safety (OPS) |        | Frequency of events reporting (FER) |        | Overall grade on patient safety (OGPS) |        | Number of events reported (NER) |        |
|                  | Step1                               | Step2  | Step1                               | Step2  | Step1                                  | Step2  | Step1                           | Step2   | Step1                               | Step2  | Step1                               | Step2  | Step1                                  | Step2  | Step1                           | Step2  |
| Predictors       | Step1                               | Step2  | Step1                               | Step2  | Step1                                  | Step2  | Step1                           | Step2   | Step1                               | Step2  | Step1                               | Step2  | Step1                                  | Step2  | Step1                           | Step2  |
| Hospital tenure  | -.01                                | -.00   | .02                                 | .04    | .09***                                 | .09*** | .01                             | .01     | -.06**                              | -.04*  | .04                                 | .04    | -.04                                   | -.02   | .15***                          | .13*** |
| Working hours    | .06**                               | .04    | .07**                               | .04    | .15***                                 | .12*** | -.02                            | -.02    | -.00                                | .04    | -.03                                | -.03   | -.02                                   | .03    | .03                             | .02    |
| Staff function   | .04                                 | .00    | .03                                 | -.01   | .03                                    | .00    | -.00                            | .01     | .09***                              | .06**  | -.04                                | -.04   | .06                                    | .04    | .08**                           | .08**  |
| TW_units         |                                     | .10*** |                                     | .04    |                                        | .03    |                                 | .04     |                                     | .06**  |                                     | .02    |                                        | .11*** |                                 | -.07*  |
| OrgLearn         |                                     | .10*** |                                     | .14*** |                                        | .19*** |                                 | -.03    |                                     | .10*** |                                     | .04    |                                        | -.00   |                                 | .09**  |
| Sup./Man_actions |                                     | .13*** |                                     | .00    |                                        | .14*** |                                 | -.16*** |                                     | .17*** |                                     | .00    |                                        | .12*** |                                 | -.08*  |
| NPRES            |                                     | .05    |                                     | .03    |                                        | .09*** |                                 | -.08**  |                                     | .03    |                                     | .04    |                                        | -.03   |                                 | .04    |
| HMS              |                                     | .16*** |                                     | .10*** |                                        | .05    |                                 | .01     |                                     | .19*** |                                     | .04    |                                        | .17*** |                                 | -.07*  |
| TWacross_HHT     |                                     | .07**  |                                     | .13*** |                                        | .14*** |                                 | -.05    |                                     | .08**  |                                     | .06*   |                                        | .17*** |                                 | -.08** |
| Staff            |                                     | .02    |                                     | .09*** |                                        | -.01   |                                 | -.20*** |                                     | .24*** |                                     | -.07** |                                        | .19*** |                                 | -.05   |
| FB&ComE          |                                     | .08**  |                                     | .24*** |                                        | .01    |                                 | .05*    |                                     | .06*   |                                     | .35*** |                                        | .15*** |                                 | .11**  |
| R <sup>2</sup>   | .00                                 | .16*** | .00*                                | .22*** | .03***                                 | .20*** | -.00                            | .01**   | .00***                              | .36*** | .00                                 | .18*** | .00                                    | .33*** | .02***                          | .05*** |

The highest absolute values of the standardized beta are shaded. \*  $p < .05$ ; \*\*  $p < .01$ ; \*\*\*  $p < .001$

**TW\_units:** Teamwork within hospital units, **OrgLearn:** Organizational learning—Continuous improvement, **Sup./Man\_actions:** Supervisor/manager expectations and actions promoting safety, **NPRES:** Non-punitive response to error, **HMS:** Hospital management support for patient safety, **TWacross\_HHT:** Teamwork across hospital units and hospital handoffs and transitions, **Staff:** Staffing, **FB&ComE:** Feedback and communication openness about error, **OPS:** Overall perceptions of patient safety, **FER:** Frequency of events reported, **OGPS:** overall grade of patient safety, **NER:** Number of events reported

# BMJ Open

## Similarities and differences in the associations between patient safety culture dimensions and self-reported outcomes in two different culture settings: A national cross-sectional study in Palestinian and Belgian hospitals

|                                 |                                                                                                                                                                                                                                                                                                                                                                                                                                                                                                                                                                                                                                                                                                                                                                                                                                                                                                                                                                          |
|---------------------------------|--------------------------------------------------------------------------------------------------------------------------------------------------------------------------------------------------------------------------------------------------------------------------------------------------------------------------------------------------------------------------------------------------------------------------------------------------------------------------------------------------------------------------------------------------------------------------------------------------------------------------------------------------------------------------------------------------------------------------------------------------------------------------------------------------------------------------------------------------------------------------------------------------------------------------------------------------------------------------|
| Journal:                        | <i>BMJ Open</i>                                                                                                                                                                                                                                                                                                                                                                                                                                                                                                                                                                                                                                                                                                                                                                                                                                                                                                                                                          |
| Manuscript ID                   | bmjopen-2018-021504.R1                                                                                                                                                                                                                                                                                                                                                                                                                                                                                                                                                                                                                                                                                                                                                                                                                                                                                                                                                   |
| Article Type:                   | Research                                                                                                                                                                                                                                                                                                                                                                                                                                                                                                                                                                                                                                                                                                                                                                                                                                                                                                                                                                 |
| Date Submitted by the Author:   | 13-Apr-2018                                                                                                                                                                                                                                                                                                                                                                                                                                                                                                                                                                                                                                                                                                                                                                                                                                                                                                                                                              |
| Complete List of Authors:       | Najjar, Shahenaz; King Abdullah International Medical Research Center, Population Health Department – Hospital - MNG-HA.; KU Leuven, Health Service Research Group, School of Public Health<br>Baillien, Elfi; Katholieke Universiteit Leuven, Marketing and Organisation Studies (MO)<br>Vanhaecht, Kris; KU Leuven, Institute for Healthcare Policy<br>Hamdan, Motasem ; Al Quds University Faculty of Medicine, Public Health<br>Euwema, Martin; KU Leuven , Occupational & Organisational Psychology and Professional Learning<br>Vleugels, Arthur; KU Leuven, Health Service Research Group, School of Public Health<br>Sermeus, Walter; KU Leuven, Health Service Research Group, School of Public Health<br>Schrooten, Ward; Universiteit Hasselt Faculteit Geneeskunde en Levenswetenschappen<br>Hellings , J; Universiteit Hasselt Faculteit Geneeskunde en Levenswetenschappen<br>Vlayen, A; Universiteit Hasselt Faculteit Geneeskunde en Levenswetenschappen |
| <b>Primary Subject Heading</b>: | Health services research                                                                                                                                                                                                                                                                                                                                                                                                                                                                                                                                                                                                                                                                                                                                                                                                                                                                                                                                                 |
| Secondary Subject Heading:      | Health services research, Public health, Health policy                                                                                                                                                                                                                                                                                                                                                                                                                                                                                                                                                                                                                                                                                                                                                                                                                                                                                                                   |
| Keywords:                       | Health & safety < HEALTH SERVICES ADMINISTRATION & MANAGEMENT, Organisation of health services < HEALTH SERVICES ADMINISTRATION & MANAGEMENT, Quality in health care < HEALTH SERVICES ADMINISTRATION & MANAGEMENT, Risk management < HEALTH SERVICES ADMINISTRATION & MANAGEMENT, Public health < INFECTIOUS DISEASES                                                                                                                                                                                                                                                                                                                                                                                                                                                                                                                                                                                                                                                   |
|                                 |                                                                                                                                                                                                                                                                                                                                                                                                                                                                                                                                                                                                                                                                                                                                                                                                                                                                                                                                                                          |

SCHOLARONE™  
Manuscripts

1  
2  
3  
4 **Similarities and differences in the associations between patient**  
5 **safety culture dimensions and self-reported outcomes in two**  
6 **different culture settings: A national cross-sectional study in**  
7 **Palestinian and Belgian hospitals**  
8  
9

10  
11 Shahenaz Najjar, Elfi Baillien, Kris Vanhaecht, Motasem Hamdan, Martin Euwema, Arthur  
12 Vleugels, Walter Sermeus, Ward Schrooten, Johan Hellings, Annemie Vlayen  
13  
14

15  
16  
17  
18 **Corresponding author: Dr. Shahenaz Najjar**  
19

20 King Abdullah International Medical Research Center/King Saud bin Abdulaziz University  
21 for Health Sciences, Population Health Department – Hospital - MNG-HA.  
22  
23

24  
25  
26  
27 Address:

28  
29 Population Health Research Section  
30

31 King Abdullah International Medical Research Center (KAIMRC new building)  
32

33 King Saud Bin Abdulaziz University for Health Sciences  
34

35 King Abdulaziz Medical City, Riyadh  
36

37 Ministry of National Guard - Health Affairs  
38

39 P.O. Box 3660, Riyadh 11481, Saudi Arabia  
40

41 Mail Code: 1515 (KAIMRC)  
42

43  
44 Tel: +966 11 429 4444 Ext. 94372  
45

46 e-mail: [shnajjar@gmail.com](mailto:shnajjar@gmail.com)  
47

48 Fax: +966 (11) 80 43050, +966(11) 429-4440  
49  
50

51  
52  
53 Dr. Elfi Baillien: University of Leuven, Brussels, Belgium  
54

55 Dr. Kris Vanhaecht: University of Leuven, Leuven, Belgium  
56  
57  
58  
59  
60

1  
2  
3 Dr. Motasem Hamdan: Al-Quds University, Jerusalem, Palestine

4  
5 Dr. Martin Euwema: University of Leuven, Leuven, Belgium

6  
7 Dr. Arthur Vleugels: University of Leuven, Leuven, Belgium

8  
9 Dr. Walter Sermeus: University of Leuven, Leuven, Belgium

10  
11 Dr. Ward Schrooten: University of Hasselt, Diepenbeek, Belgium

12  
13 Dr. Johan Hellings: University of Hasselt, Diepenbeek, Belgium

14  
15 Dr. Annemie Vlayen: University of Hasselt, Diepenbeek, Belgium

16  
17  
18  
19  
20 **Key words:** Patient safety, patient safety culture, health services, Palestine, Belgium.

21  
22  
23  
24 **Word count (excluding title page, reference, figures):**

- 25  
26 - **Abstract: 300**
- 27  
28 - **Strengths and limitations of this study: 118**
- 29  
30 - **Main manuscript: 4336**
- 31  
32  
33  
34  
35  
36  
37  
38  
39  
40  
41  
42  
43  
44  
45  
46  
47  
48  
49  
50  
51  
52  
53  
54  
55  
56  
57  
58  
59  
60

## Abstract

**Objectives:** To investigate the relationships between patient safety culture (PSC) dimensions and PSC self-reported outcomes across different cultures and to gain insights in cultural differences regarding patient safety culture.

**Design:** Observational, cross-sectional study.

**Setting:** Ninety Belgian hospitals and 13 Palestinian hospitals.

**Participants:** A total of 2,836 healthcare professionals matched for profession, tenure and working hours.

**Primary and secondary outcome measures:** The validated versions of the Belgian and Palestinian Hospital Survey on Patient Safety Culture (HSOPSC) were used. An exploratory factor analysis was conducted. Reliability was tested using Cronbach's alpha ( $\alpha$ ). In this study, we examined the specific predictive value of the PSC dimensions and its self-reported outcome measures across different cultures and countries. Hierarchical regression and bivariate analyses were performed.

**Results:** Eight PSC dimensions and four PSC self-reported outcomes were distinguished in both countries. Cronbach's alpha was  $\alpha \geq 0.60$ . Significant correlations were found between PSC dimensions and its self-reported outcome ( $P$ -value range  $<0.05$  to  $<0.001$ ). Hierarchical regression analyses showed overall perception of safety was highly predicted by hospital management support in Palestine ( $\beta=0.16$ ,  $P<0.001$ ), and staffing in Belgium ( $\beta=0.24$ ,  $P<0.001$ ). The frequency of events was largely predicted by feedback and communication in both countries (Palestine:  $\beta=0.24$ ,  $P<0.001$ ; Belgium:  $\beta=0.35$ ,  $P<0.001$ ). Overall grade for patient safety was predicted by organizational learning in Palestine ( $\beta=0.19$ ,  $P<0.001$ ) and staffing in Belgium ( $\beta=0.19$ ,  $P<0.001$ ). Number of events reported was predicted by staffing in Palestine ( $\beta=-0.20$ ,  $P<0.001$ ) and feedback and communication in Belgium ( $\beta=0.11$ ,  $P<0.01$ ).

1  
2  
3 **Conclusion:** To promote patient safety in Palestine and Belgium, staffing and communication  
4 regarding errors should be improved in both countries. Initiatives to improve hospital  
5 management support and establish constructive learning systems would be especially  
6 beneficial for patient safety in Palestine. Future research should address the association  
7 between safety culture and hard patient safety measures such as patient outcomes.  
8  
9  
10  
11  
12

### 13 14 15 **Strengths and limitations of this study**

- 16  
17  
18 • Our study enables us to draw conclusions regarding the varying associations among  
19 PSC dimensions and self-reported patient safety outcomes across different cultural  
20 settings.  
21  
22
- 23  
24 • This is the first study to explore the predictive value of the HSOPSC in matched  
25 samples from two different countries.  
26  
27
- 28  
29 • Using a matched samples study design is useful, allowing researchers to establish a  
30 good degree of validity and to investigate a rationalized and focused research question.  
31
- 32  
33 • Our results verify the international and cross-cultural validity of the HSOPSC;  
34 however, more studies are needed to provide further evidence in this regard.  
35
- 36  
37 • Our study relied exclusively on subjective self-reported measures; future research on  
38 linking actual adverse events data with PSC dimensions objectively is required to  
39 clarify this relationship.  
40  
41  
42  
43  
44  
45  
46  
47  
48  
49  
50  
51  
52  
53  
54  
55  
56  
57  
58  
59  
60

## Background

Patient safety is a major focus in the improvement of the quality of healthcare [1-3]. This has led to an increased interest in patient safety culture (PSC) assessments in healthcare organizations [4]. Clinical outcomes and adverse event rates have been used as indicators of patient safety in previous studies [5]. Earlier research has demonstrated a link between organizational culture, outcomes and adverse event rates [6-8], financial performance [9] and patient satisfaction [10]. The development of a positive PSC may help to integrate the concern for safety into the daily functioning of organizations and into the routines of individuals and teams [6]. In this study, PSC is defined as the presence of values, beliefs, norms, behaviors and attitudes that may contribute to patient safety [11]. Hospitals that invest in PSC may enable staff not only to prevent and solve safety problems, but also to learn collectively from problems that occur at the frontline of healthcare delivery [8,12,13]. Several studies have highlighted the perception of patient safety and staff attitudes toward safety [14-16]. Others have reported on the psychometric evaluation of PSC tools [17-21].

A range of tools has been developed to measure PSC; like, PSC in healthcare organizations, hospital surveys on patient safety and safety attitude questionnaires [22,23]. These instruments can be used to elicit patient safety-related assessments by healthcare staff at: (1) a hospital level, (2) a unit level and (3) a professional level [16,24]. The original American Hospital Survey on Patient Safety Culture (HSOPSC) was released by the Agency for Healthcare Research and Quality in November 2004. The survey is one of the most commonly applied instruments for the assessment of PSC. Moreover, it has been widely translated and validated in several languages and countries, including Belgium, England, Norway, Scotland, the Netherlands and Palestine [17-21,25,26]. The survey is intended to help hospitals assess the extent to which their cultures emphasize the importance of patient safety, encourage both

1  
2  
3 the reporting and open discussion of errors, and create an atmosphere of continuous learning  
4  
5 and improvement.  
6

7 The original HSOPSC consists of 42 items loading on 12 dimensions: two outcome  
8  
9 dimensions and 10 safety dimensions. The 10 different PSC dimensions are expected to have  
10  
11 a favorable impact on the two composite outcome dimensions (multiple items) and the two  
12  
13 single-item outcomes [14,17]. The four outcomes are self-reported patient safety outcomes.  
14

15  
16 Despite efforts to measure PSC in terms of dimensions and outcomes to improve patient  
17  
18 safety, few studies have examined the specific predictive value of the dimensions in terms of  
19  
20 HSOPSC outcomes [27]. Research to date has not detailed the relationships between the  
21  
22 HSOPSC dimensions and its self-reported outcome measures across countries. The  
23  
24 governments of Belgium and Palestine promote the HSOPSC as a tool to support the  
25  
26 development of patient safety interventions or initiatives in hospitals. The workforce of the  
27  
28 Ministry of Health Hospitals in the West Bank in 2016 was estimated at 4,023 personnel,  
29  
30 comprising 649 physicians, 1,860 nurses and midwives, 590 paramedical, 66 pharmacists and  
31  
32 858 administrative and support staff. Our study included hospitals that are operated in both  
33  
34 governmental and non-governmental sectors in Belgium and Palestine. We assumed that there  
35  
36 were no staff-related differences that would influence the PSC between the two countries.  
37  
38 Both governments have called for further investigations into the effectiveness of the HSOPSC  
39  
40 within and between different cultural contexts [15]. Thus, the first aim of this study was to  
41  
42 determine which HSOPSC dimensions are associated with self-reported outcome measures.  
43  
44 Second, we aimed to investigate the impact of cultural context on these associations. These  
45  
46 findings offer further insights into the similarities and differences regarding associations  
47  
48 between the PSC dimensions and outcomes of hospital workers in two very different cultural  
49  
50 settings. The results also further attest to the value of the HSOPSC to increase patient safety  
51  
52 in a range of settings.  
53  
54  
55  
56  
57  
58  
59  
60



## Methods

### Design, setting and sample

A cross-sectional study design was used. In total, 90 acute Belgian hospitals and 13 Palestinian hospitals were included in the study. In Belgium, workshops were organized for participating hospitals in which the objectives and survey were explained. The Dutch and French validated versions of the HSOPSC were distributed organization-wide to 90 acute hospitals that participated in a federal patient safety program between 2007 and 2009 (baseline PSC measurement [15,25,26]). These hospitals comprised 58 Dutch-speaking hospitals, 31 French-speaking hospitals and one that was both Dutch- and French-speaking. In total, 68 hospitals used a paper-based survey, 15 used an electronic survey and seven applied a mixed method for survey administration. Technical assistance was available during the periods of data collection. Hospitals were invited to participate in a Belgian comparative study on a voluntary, confidential and free-of-charge basis. A total of 91,852 questionnaires were distributed, of which 47,648 were returned (response rate 51.9%). The comparative database was managed by a neutral academic institution and was not accessible to government authorities.

In Palestine, PSC baseline data were collected from September 2010 to August 2011 in 13 hospitals: 11 public hospitals and two general non-governmental hospitals situated in the West Bank. All hospitals were Arabic-speaking and used a validated paper-based Arabic language survey [21]. Workshops were organized at the participating hospitals to explain the objectives and survey. A paper version of the questionnaire was distributed and participants were informed about the purpose of the study. They were also told that their participation was anonymous, voluntary and confidential. Technical assistance was accessible during the periods of data collection. A total of 3,153 questionnaires were distributed, of which 1,690

1  
2  
3 were returned (response rate 53.6%), of which 1,418 could be used for this study. The  
4  
5 collected database was managed by an independent academic institution.  
6

7 For both the Belgian and Palestinian samples, the survey was distributed anonymously to  
8  
9 all healthcare staff that had direct (physicians, nurses, clinical staff, pharmacists, radiology  
10  
11 staff and laboratory staff) or indirect (all hospital supervisors, managers, administrators, and  
12  
13 support and administrative staff) interaction with patients. The survey was self-administered  
14  
15 and then placed in sealed envelopes without any respondent identification. Collection  
16  
17 points/boxes were identified for returning the completed questionnaires.  
18  
19

20 For the purposes of this study, the Belgian sample was matched to the Palestinian sample  
21  
22 by selecting a matched subsample based on staff position, years of experience at the hospital  
23  
24 and number of hours worked per week. Specifically, we used the Palestinian set ( $N = 1,418$ )  
25  
26 to randomly (blind) select 1:1 matching participants regarding position, tenure and working  
27  
28 hours from the Belgian sample. When more than one matching participant was identified, we  
29  
30 randomly (blind) selected one of the participants that fitted the criteria. The matched sample  
31  
32 was selected manually by the data management department.  
33  
34

35 The Belgian and Palestinian samples consisted of a total of 2,836 healthcare staff (1,418  
36  
37 respondents from each country). The subsample comprised the following staff categories:  
38  
39 nurses (38.6%), head nurses (9.4%), nursing aid staff (5.7%), physicians (17.9%), pharmacists  
40  
41 (2.9%) and other healthcare staff (25.5%). The sample hospitals ranged in size from small  
42  
43 (fewer than 150 beds) to large (more than 200 beds). The research was fully supported and  
44  
45 ethically approved by the Departments of Health of the Belgian and Palestinian governments,  
46  
47 and all the hospitals approached participated in our study.  
48  
49

#### 50 **Funding statement**

51  
52 This research received no specific grant from any funding agency in the public, commercial or  
53  
54 not-for-profit sectors.  
55  
56  
57

## Instruments and measures

The HSOPSC consists of 42 items and is designed to measure 10 PSC dimensions and four outcome measures. Items are scored on a 5-point Likert scale ranging from 1 = ‘strongly disagree’ to 5 = ‘strongly agree’ or from 1 = ‘never’ to 5 = ‘always’. Respondents were also asked to provide some demographic information (e.g., their work area/unit, staff position, whether they have direct interaction with patients) [14]. PSC dimensions and self-reported outcomes are shown in Table 1.

Using the matched samples from both countries, the relationships between all dimensions and outcomes of the HSOPSC were assessed. Five-point response scales were used (1 = ‘strongly disagree’ to 5 = ‘strongly agree’).

### *Independent variables*

For both samples, the PSC dimensions shown in Table 1 were used. All PSC dimensions consist of multiple items.

### *Dependent variables*

Four self-reported outcome measures were used as dependent variables (Table 1). Two composite outcomes have multiple items scored on a 5-point Likert scale, of which the labels vary throughout the dimensions as follows: (1) frequency with events reported from 1 = ‘strongly disagree’ to 5 = ‘strongly agree’; and (2) overall perceptions of patient safety from 1 = ‘never’ to 5 = ‘always’. Patient safety grade and number of events are ordinal, ranging from 1 to 5 (1 = ‘failing’ to 5 = ‘excellent’) and from 1 to 6 (1 = ‘no event’ to 6 = ‘more than 21 events’), respectively; both are single-item measures.

### *Control variables*

The following controls were measured in both samples: staff position is categorical; years of working experience at the hospital is numerical, ranging from 1 to 6 (1 = ‘less than 1 year’ to 6 = ‘21 years or more’); and number of hours worked per week is numerical, ranging from 1

1  
2  
3 to 6 (1 = 'less than 20 hours per week to 6 = '100 hours or more per week'). The control  
4  
5 variables were selected based on previous research and/or their significant correlations with  
6  
7 the outcomes [28,29].  
8  
9

### 10 **Statistical analysis**

11  
12 A total of 2,836 healthcare staff was participated in the study. For the purposes of our  
13  
14 analysis, negatively worded items were reversed coded so that a higher score reflected a more  
15  
16 positive response. First, we conducted exploratory factor analyses (EFA) using the Palestinian  
17  
18 and matched Belgian data to test whether we could detect the same dimension structure in  
19  
20 both samples. We aimed for acceptable levels of reliability (Cronbach's  $\alpha \geq 0.60$ ) as  
21  
22 recommended in the HSOPSC user guide [30]. Based on the EFA analyses, we optimized the  
23  
24 model by defining 10 PSC dimensions instead of the original 12 HSOPSC dimensions in both  
25  
26 the Palestinian and Belgian data. Four original dimensions were revealed as two dimensions.  
27  
28 One combined 'communication openness' and 'feedback about error' in one dimension and  
29  
30 the other combined 'teamwork across hospital units' and 'hospital handoffs and transitions'  
31  
32 (Table 2). The other two outcome measures were individual items: 'patient safety grade' and  
33  
34 'number of events reported'. Cronbach's  $\alpha$  values for both the Palestinian and Belgian  
35  
36 databases are presented in Table 2.  
37  
38  
39

40  
41 Second, we conducted hierarchical regression analyses for both the Palestinian and  
42  
43 Belgian samples using IBM SPSS version 20.0 (SPSS Inc., Chicago, IL, USA). Regression  
44  
45 Analyses are particularly suitable for analyses of variance in which we aim to test whether  
46  
47 and to what extent the variance on the dependent variables (and as reported by the  
48  
49 respondents) can be explained by the independent variables; which is reflected by  $R^2$ . By  
50  
51 including hierarchical analyses, we are able to detect how much extra variance ( $R^2$  change) in  
52  
53 the PSC outcomes is explained by introducing the PSC dimension in the analyses on top of  
54  
55 the control variables [31]. A composite average score was generated by calculating the  
56  
57

1  
2  
3 average responses to the items within a dimension. As 5-point response scales were used, the  
4  
5 composite scores generated were any value between 1 and 5. Regression analyses were  
6  
7 conducted to determine the extent to which the PSC dimensions (modeled as independent  
8  
9 variables) predicted the four self-reported dimensions (modeled as dependent variables).  
10  
11 Multiple R ( $R^2$ ) was used to indicate the proportion of variance explained by the model. An  
12  
13 indication of the predictive value of the PSC dimensions was confirmed using standardized  
14  
15 beta values ( $\beta$ ). A standardized beta coefficient is a standardized partial correlation coefficient  
16  
17 that allows us to compare the strength of the effect of each predictor/independent variable in  
18  
19 predicting the outcome/dependent variable, with higher absolute values of the beta coefficient  
20  
21 indicating a stronger effect. Based on their significant correlation with the four outcomes over  
22  
23 the Palestine and Belgian samples, the following controls were used in all regression analyses:  
24  
25 experience at hospital (years), working hours (hours) and staff position. The control variables  
26  
27 included in both countries were consistent to assure we could compare the results.  
28  
29

### 30 31 **Data sharing statement**

32  
33 The data that support the findings of this study are available from the correspondent author  
34  
35 upon reasonable request and with permission of University of Leuven and University of  
36  
37 Hasselt.  
38

### 39 40 **Patient and public involvement**

41  
42 Patient and public were not involved in the study.  
43

### 44 45 **Ethical approval**

46  
47 To ensure the privacy of the respondents, the survey was conducted anonymously. The  
48  
49 researchers obtained ethical approval from the Departments of Health of the Belgian and  
50  
51 Palestinian governments and institutional permits from the participating hospitals. Formal  
52  
53 ethical approval and informed patient consent were not necessary for this type of study.  
54  
55  
56  
57  
58  
59

## Results

### Participants' characteristics

Most participants were nurses 761 (53.7%) and 254 (17.9%) were physicians. Most of the participants had between 1 and 5 years of experience in their current work unit. Details of the matched sample and participants' characteristics for both Palestinian and Belgian respondents are described in Table 3.

### Correlation between PSC dimensions and outcomes of the HSOPSC

Table 4 presents the results of two correlation tables; namely, Palestinian correlations shown below the diagonal and Belgian correlations above. Preliminary Spearman's correlation analyses (Table 4) revealed some differences between the Palestinian and Belgian samples. The analyses showed significant positive correlations between overall perceptions of patient safety and most of the dimensions in both samples. Regarding the frequency of event reporting, the data also showed a positive correlation with most of the dimensions in both samples. In both samples, most dimensions had a positive association with overall grade for patient safety. Regarding the number of events reported, the Palestinian sample had a significant and negative relationship with four dimensions: supervisor/manager expectations and actions promoting safety, non-punitive response to error, staffing and teamwork across hospital units and hospital handoffs and transitions. A negative correlation indicates the existence of an inverse relationship between two variables; that is, an increase in one variable is associated with a decrease in the other variable. This was also the case for the Belgian sample, with the number of events reported found to be associated positively with organizational learning—continuous improvement, and negatively with support from hospital management for patient safety, staffing and teamwork across hospital units and during hospital handoffs and transitions.

### Hierarchical regression analyses

Regression Analyses were used to investigate the predictive value of the PSC dimensions regarding the four self-reported outcome measurements. The detailed results are shown in Table 5 and the results are discussed generally below.

#### *Overall perceptions of safety (OPS)*

The PSC dimensions explained 16% and 36% of the variance of overall perceptions of safety (OPS) in the Palestinian and Belgian samples, respectively. OPS outcome was predicted in both countries by teamwork within hospital units, organizational learning–continuous improvement, supervisor/manager expectations and actions promoting safety, support from hospital management for patient safety, teamwork across hospital units and during hospital handoffs and transitions, and feedback and communication openness regarding errors. The standardized beta ( $\beta$ ) values ranged from 0.06 to 0.24 ( $P$ -values:  $<0.05$  to  $<0.001$ ). In addition to the previously mentioned predictors of OPS, staffing was a predictor for the Belgian sample only ( $\beta = 0.24$ ,  $P < 0.001$ ).

#### *Frequency of event reporting (FER)*

In the Palestinian and Belgian sample, the PSC dimensions explained 22% and 18% of the variance of frequency of event reporting (FER) outcome, respectively. This outcome was predicted by teamwork across hospital units and during hospital handoffs and transitions, staffing, and feedback and communication openness regarding errors with  $\beta$ -values ranging from 0.06 to 0.35 ( $P$ -values  $<0.05$  to  $<0.001$ ). Organizational learning–continuous improvement ( $\beta = 0.14$ ,  $P < 0.001$ ), and hospital management support for patient safety ( $\beta = 0.10$ ,  $P < 0.001$ ) were also good predictors for the Palestinian sample.

#### *Overall grade on patient safety (OGPS)*

In total, 20% of the OGPS was predicted by PSC dimensions in the Palestinian sample and 33% in the Belgian sample. The results revealed two similar predictors in the two countries,

1  
2  
3 namely supervisor/manager expectations and actions promoting safety and teamwork across  
4 hospital units and during hospital handoffs and transitions, with  $\beta$ -values ranging from 0.12 to  
5 0.17 ( $P < 0.001$ ). In addition to the previously mentioned predictors, organizational learning–  
6 continuous improvement ( $\beta = 0.19$ ,  $P < 0.001$ ) and non-punitive response to error ( $\beta = 0.09$ ,  $P$   
7  $< 0.001$ ) were significant predictors of OGPS in Palestine. Furthermore, teamwork within  
8 hospital units ( $\beta = 0.11$ ,  $P < 0.001$ ), support from hospital management for patient safety ( $\beta =$   
9 0.17,  $P < 0.001$ ), staffing ( $\beta = 0.19$ ,  $P < 0.001$ ) and feedback and communication openness  
10 regarding errors ( $\beta = 0.15$ ,  $P < 0.001$ ) were significant predictors of OGPS in Belgium.

### 11 12 13 14 15 16 17 18 19 20 *Number of events reported (NER)*

21 The PSC dimensions predicted only 1% of the NER in Palestine and 5% in Belgium.  
22 Supervisor actions promoting safety and communication openness regarding errors were good  
23 predictors in both countries ( $\beta$  ranging from 0.05 to 0.16,  $P$ -values ranging from  $< 0.05$  to  
24  $< 0.001$ ). In Palestine, non-punitive response to error ( $\beta = -0.08$ ,  $P < 0.01$ ), and staffing ( $\beta = -$   
25 0.20,  $P < 0.001$ ) were also predictors of the NER. Moreover, teamwork within hospital units  
26 ( $\beta = -0.07$ ,  $P < 0.05$ ), organizational learning–continuous improvement ( $\beta = 0.09$ ,  $P < 0.01$ ),  
27 hospital management support for patient safety ( $\beta = -0.07$ ,  $P < 0.05$ ), and teamwork across  
28 hospital units and during hospital handoffs and transitions ( $\beta = -0.08$ ,  $P < 0.01$ ) were  
29 predictors in Belgium.

## 30 31 32 33 34 35 36 37 38 39 40 41 42 **DISCUSSION**

43 This study enabled us to draw conclusions regarding the extent to which each HSOPSC safety  
44 dimension contributes specifically to outcome dimensions. It is the first study to explore the  
45 predictive value of HSOPSC in matched samples from two different countries. As such, it  
46 provides information about: (a) the impact of the various PSC dimensions on patient safety  
47 outcomes, and (b) cross-cultural differences in this respect between Palestinian and Belgian  
48 hospitals. Thus, our research provides an improved understanding of the influence of  
49  
50  
51  
52  
53  
54  
55  
56  
57



1  
2  
3 initiatives to improve specific outcome measures on patient safety culture. Overall, our  
4 findings emphasize that the HSOPSC is a valid instrument that can be used to improve  
5 outcomes related to safe healthcare for patients. The results of our study demonstrate that at  
6  
7 least two of the HSOPSC dimensions contribute to one of the self-reported outcome measures  
8  
9 in each country. Thus, our findings attest to the value of the PSC dimensions regarding patient  
10  
11 safety outcomes. Only one dimension, non-punitive response to error, was found to have no  
12  
13 association with any of the outcome measures in Belgium. A possible explanation for this  
14  
15 could be that this dimension has a low internal consistency level and, therefore, affected the  
16  
17 assessment of its predictive value in the Belgian sample. Despite this finding, only a small  
18  
19 number of differences were detected between the two samples.  
20  
21  
22  
23

24 The results obtained for both the Palestinian and Belgian samples showed that hospitals  
25  
26 should focus on investing in interventions that enable feedback and enhance communication  
27  
28 openness regarding errors, sustain teamwork within and across hospital units, maintain  
29  
30 organizational learning–continuous improvement, and improve hospital handoffs and  
31  
32 transitions. These interventions will improve OPS. As such, our analyses and results explicitly  
33  
34 reveal ‘important’ PSC dimensions in terms of safety outcomes, and these PSC dimensions  
35  
36 are shown to be the same for both the Palestinian and Belgian hospitals. Under such  
37  
38 circumstances, implementing strategies and tools such as TeamSTEPPS may improve  
39  
40 teamwork within and across units, in addition to strengthening communication and feedback  
41  
42 skills regarding errors to enable the establishment of a learning system based on previous  
43  
44 mistakes [30].  
45  
46  
47

48 Event reporting is fundamental to the detection of patient safety problems and represents  
49  
50 a core prerequisite of effective clinical risk management [27,32]. This outcome is of particular  
51  
52 importance because these items reflect the frequency of the actual reporting of an act, and the  
53  
54 willingness to report unsafe events, with higher error reporting rates leading to a stronger  
55  
56  
57  
58  
59

1  
2  
3 culture of accountability. The results showed that, in both the Palestinian and Belgian  
4 samples, this outcome is influenced mainly by maintaining open lines of information and  
5 communication in the unit. These observations are consistent with those reported by Pfeiffer  
6 and Manser [27]. Moreover, improvements in staffing and teamwork may also influence this  
7 outcome. Palestinian respondents found that managers who consider patient safety to be a top  
8 priority and build constructive learning systems based on previous mistakes encourage their  
9 staff to report adverse events. This result is also commonly reported in the published literature  
10 [1,32].  
11  
12  
13  
14  
15  
16  
17  
18  
19

20 Respondents were asked to provide an OGPS in their work area/unit and to indicate the  
21 number of events they reported over the past 12 months.  
22  
23

24 The overall grade for patient safety (OGPS) was found to be particularly significant in  
25 building a constructive learning system based on previous mistakes in Palestine and in  
26 improving staffing levels in Belgium. In other words, although our results revealed many  
27 similarities between the matched set of Palestinian and Belgian healthcare professionals, we  
28 also found cultural differences regarding OGPS. In accordance with previous studies, having  
29 enough staff [33] and opportunities to learn from previous mistakes [6] increased the  
30 likelihood of staff reporting good or excellent safety grades in Belgium. Other contributing  
31 PSC dimensions are maintaining manager expectations and actions in promoting safety,  
32 improving teamwork across hospital units and supporting hospital handoffs and transitions in  
33 both countries. Our study also revealed that, in Palestine, a higher score for OGPS relates to  
34 greater support regarding non-punitive response to error. Additionally, initiatives to improve  
35 teamwork within units, support from hospital management for patient safety, staffing and  
36 feedback and communication openness regarding errors may also act to improve OGPS in  
37 Belgium.  
38  
39  
40  
41  
42  
43  
44  
45  
46  
47  
48  
49  
50  
51  
52  
53  
54  
55  
56  
57  
58  
59  
60

1  
2  
3 As PSC dimensions explained only 1% (Palestine) and 5% (Belgium) of the number of  
4 events reported (NER), influencing PSC dimensions will have less impact on patient safety  
5 outcomes compared with other PSC outcomes ( $R^2_{\text{OPS-Palestine}} = 16\%$ ;  $R^2_{\text{OPS-Belgium}} = 36\%$ ;  $R^2_{\text{FER-}}$   
6  $\text{Palestine} = 22\%$ ;  $R^2_{\text{FER-Belgium}} = 18\%$ ;  $R^2_{\text{OGPS-Palestine}} = 20\%$ ;  $R^2_{\text{OGPS-Belgium}} = 33\%$ ). As such, the  
7 HSOPSC seems to be particularly effective for the prediction of OPS, FER, and OGPS, in  
8 both the Belgian and Palestinian samples. It can be speculated that the finding that NER is  
9 less well explained through the PSC dimensions is caused by the broad scope of the HSOPSC  
10 PSC dimensions regarding patient safety, which consequently renders this instrument less  
11 effective for this very specific outcome. A further explanation could be that our results stem  
12 not from a low predictive value, but from the under-reporting of adverse events, which would  
13 result in a low mean and low variance regarding this outcome dimension. A final explanation  
14 could be that respondents found it difficult to answer this question based on experience, as  
15 they may not themselves know how many events have been reported. Therefore, hospitals  
16 seeking to invest in patient safety must not only measure NER, but should also link the PSC  
17 dimensions to objective measurements of NER.  
18  
19  
20  
21  
22  
23  
24  
25  
26  
27  
28  
29  
30  
31  
32  
33  
34

35 To summarize, our results suggest that improved self-reported outcome measures  
36 regarding patient safety in both Palestine and Belgium are more likely to be achieved through  
37 better teamwork across units and during hospital handoffs and transitions, encouraging  
38 feedback and communications regarding errors, and implementing actions to promote safety.  
39 Furthermore, improving teamwork within hospital units, providing a work climate that  
40 promotes the adoption of safety as a top priority by hospital management and resolving  
41 staffing problems will also influence most outcome measures in Belgium [34,35]. In  
42 Palestine, bringing errors to the attention of managers and other staff and using mistakes as  
43 valuable learning opportunities [3] may also have an impact on safety outcome measures.  
44  
45  
46  
47  
48  
49  
50  
51  
52  
53  
54  
55  
56  
57  
58  
59  
60

### Limitations and future research

The current study has some methodological limitations that should be noted. First, the study used a cross-sectional design; therefore, claims of causal relationships are not possible. Second, as the present study relied exclusively on subjective measures that reflect the willingness of respondents to report events, and more specifically, the reporting of near misses, the results may be distorted by the common method bias of these self-reported outcome measures. Future research should examine the relationship between PSC dimensions and actual adverse event rates to clarify this relationship by linking objective data with PSC dimensions. Nevertheless, this study is the first to provide further insights into the value of the HSOPSC in terms of: (a) the impact of the PSC dimensions on patient safety outcomes, and (b) in different cultural settings. Third, the associations between the safety and PSC outcomes of the HSOPSC were investigated using a matched sample (to rule out possible bias due to sample differences between the two countries) using linear regression analyses. However, we cannot ignore the limitation of this design, which uses the most influential variables that are, in fact, approximations made from the researchers' perspective. These assumptions might be incorrect and could lead to the introduction of major confounding variables. Despite these methodological restrictions, previous research has shown that matched samples designs are useful, allowing researchers to conduct streamlined and focused research while maintaining a good degree of validity [36]. Another possible concern is that as most respondents were nurses and other health professionals; thus, the results may reflect the personal perceptions of the respondents and affect our association results. However, we should not forget that nurses are the most highly represented staffing group in hospitals, and that our sample also included physicians, pharmacists, administrative and quality and safety staff. Finally, the Cronbach's alpha values for some of the composite scores measuring PSC were low ( $\alpha < 0.70$ ), which may affect the correlation results, as in the Palestinian sample where all PSC dimensions were

1  
2  
3 positively associated with the OGPS (except staffing). This specific dimension has shown a  
4  
5 low internal consistency in most psychometric evaluation studies of the HSOPSC [28,30],  
6  
7 indicating that it is necessary to review and update the items of this dimension to improve its  
8  
9 internal consistency. Our results further attest to the international and cross-cultural validity of  
10  
11 the HSOPSC. The relationships between the PSC and self-reported outcomes in other  
12  
13 countries will provide further evidence in this regard.  
14  
15

## 16 **Conclusion**

17  
18 We found that perceptions of staffing and feedback and communication regarding errors were  
19  
20 important predictive dimensions of PSC self-reported outcome measures in both countries.  
21  
22 But we also found some contradictory results in our matched sample. Future research should  
23  
24 focus on enriching the evidence of the linking of safety culture and hard patient safety  
25  
26 outcomes in order to assess the practical validity of safety culture surveys. The divergences of  
27  
28 patient safety perceptions in both countries implicate the need of local priority setting and a  
29  
30 tailor-made approach for improvement strategies in hospitals. A great challenge lies in the  
31  
32 field of implementation science, testing the effectiveness of safety culture strategies.  
33  
34  
35  
36  
37  
38  
39  
40  
41  
42  
43  
44  
45  
46  
47  
48  
49  
50  
51  
52  
53  
54  
55  
56  
57  
58  
59  
60

### List of abbreviations

|                   |                                                                      |
|-------------------|----------------------------------------------------------------------|
| AHRQ              | Agency for healthcare research and quality                           |
| $\beta$           | Standardized beta values                                             |
| FB&ComE           | Feedback and communication openness about errors                     |
| FER               | Frequency of event reporting                                         |
| HMS               | Hospital management support for patient safety                       |
| HSOPSC            | Hospital survey on patient safety culture                            |
| NER               | Number of events reported                                            |
| NPRE              | Non-punitive response to error                                       |
| OGPS              | Overall grade of patient safety                                      |
| OPS               | Overall perceptions of safety                                        |
| OrgLearn          | Organizational learning—continuous improvement                       |
| Staff             | Staffing                                                             |
| Sup./Man._actions | Supervisor/manager expectations and actions promoting safety         |
| TW _units         | Teamwork within hospital units                                       |
| TWacross_HHT      | Teamwork across hospital units and hospital handoffs and transitions |

### Competing interests

The authors declare that they have no competing interests.

### Authors' contributions

SN performed the overall statistical analyses and drafted the manuscript. EB actively contributed to the statistical analyses, the interpretation of the results, and to the preparation of the manuscript. MH coordinated data collection (Palestine) and critically revised the

1  
2  
3 manuscript. AVle and ME participated in critically revising the manuscript for important  
4 intellectual content. WSer and WSch participated in the analyses and interpretation of the data  
5 and contributed to the preparation of the manuscript. KV and JH were involved in the study  
6 design and revised the manuscript critically. JH coordinated the data collection (Belgium).  
7  
8 AVla was involved in the study design, manuscript outline, and contributed to the manuscript  
9 and data preparation (Belgian data). All authors have read and approved the final manuscript.  
10  
11  
12  
13  
14  
15

### 16 **Acknowledgments**

17  
18 We particularly acknowledge all participant hospitals and their staff who devoted time to  
19 completing the surveys. We extend our gratitude to the Palestinian and Belgian governments  
20 for their cooperation and supporting this research.  
21  
22  
23  
24  
25  
26  
27  
28  
29  
30  
31  
32  
33  
34  
35  
36  
37  
38  
39  
40  
41  
42  
43  
44  
45  
46  
47  
48  
49  
50  
51  
52  
53  
54  
55  
56  
57  
58  
59  
60

## References

1. Schwendimann R, Zimmermann N, Küng K, et al. **Variation in safety culture dimensions within and between US and Swiss Hospital Units: an exploratory study.** *BMJ Qual Saf* 2013; **22**(1):32–41.
2. Donaldson LJ, Fletcher MG. **The WHO World Alliance for Patient Safety: towards the years of living less dangerously.** *Med J Aust* 2006; **184**:S69e72.
3. Najjar S, Hamdan M, Euwema MC, et al. **The Global Trigger Tool shows that one out of seven patients suffers harm in Palestinian hospitals: challenges for launching a strategic safety plan,** *Int J Qual Health Care* 2013; **25**:640–647, <https://doi.org/10.1093/intqhc/mzt066>.
4. Institute of Medicine. **To err is human: Building a safer health system.** Washington, D.C: *The National Academy press*, 2000.
5. Wakefield JG, Jorm CM. **Patient safety a balanced measurement framework.** *Aust Health Rev* 2009; **33** (3):382–389.
6. Stone PW, and Gershon PR. **Nurse Work Environments and Occupational Safety in Intensive Care Units.** *J Nurs Adm* 2009; **39**(7-8 Suppl):S27–34
7. Mardon RE, Khanna K, Sorra J, et al. **Exploring relationships between hospital patient safety culture and adverse events.** *J Patient Saf* 2010; **6**:226–32.
8. Singer S, Lin S, Falwell A, et al. **Relationship of safety climate and safety performance in hospitals.** *Health Serv Res* 2009; **44**:399–421.
9. Kotter JP, and Heskett JL. **Corporate Culture and Performance.** *New York: Free Press*, 1992.
10. Carman JM, Shortell SM, Foster RW, et al. **Keys for Successful Implementation of Total Quality Management in Hospitals.** *Health Care Manage Rev.* 2010; **35**(4):283–93



- 1  
2  
3 11. Institute of Medicine. **Crossing the Quality Chasm: A New Health System for the**  
4  
5 **21st Century.** *Washington, DC: National Academy Press, 2001.*  
6
- 7 12. Edmondson AC. **Psychological Safety and Learning Behavior in Work Teams.**  
8  
9 *Administrative Science Quarterly* 1999; **44**(2):350–83.  
10
- 11 13. Hansen LO, Williams MV, and Singer SJ. **Perceptions of Hospital Safety Climate**  
12  
13 **and Incidence of Readmission.** *Health Serv Res* 2011; **46**(2):596–616.  
14
- 15 14. Sorra J, Famolaro T, Dyer N, et al. **Hospital Survey on Patient Safety Culture: 2012**  
16  
17 **User Comparative Database Report.** Prepared by Westat, Rockville, MD, under  
18  
19 Contract No. HHSA 290200710024C. AHRQ Publication No. 12-0017, January 2012.  
20  
21 Agency for Healthcare Research and Quality, Rockville, MD.  
22  
23 <http://www.ahrq.gov/qual/hospsurvey12/index.html>  
24  
25
- 26 15. Vlayen A, Hellings J, Claes N, Peleman H, Schrooten W. **A nationwide Hospital**  
27  
28 **Survey on Patient Safety Culture in Belgian hospitals: setting priorities at the**  
29  
30 **launch of a 5-year patient safety plan.** *BMJ Qual Saf* 2012;**21**(9):760–7.  
31  
32
- 33 16. Deilkas E, Hofoss D. **Patient safety culture lives in departments and wards:**  
34  
35 **multilevel partitioning of variance in patient safety culture.** *BMC Health Serv Res*  
36  
37 2010; **10**:85.  
38
- 39 17. Sorra J, Dyer N: **Multilevel psychometric properties of the AHRQ hospital survey**  
40  
41 **on patient safety culture.** *BMC Health Serv Res* 2010; **10**:199.  
42  
43
- 44 18. Waterson PE, Griffiths P, Stride C, et al. **Psychometric properties of the hospital**  
45  
46 **survey on patient safety culture: findings from the UK.** *Qual Saf Health Care*  
47  
48 2010; **19**:e2. doi:10.1136/qshc.2008.031625.  
49
- 50 19. Sarac C, Flin R, Mearns K, et al. **Hospital survey on patient safety culture:**  
51  
52 **psychometric analysis on a Scottish sample.** *Qual Saf Health Care* 2011;  
53  
54 **20**(10):842–8.  
55  
56  
57  
58  
59

- 1  
2  
3 20. Olsen E. **Reliability and validity of the Hospital Survey on Patient Safety Culture**  
4 **at a Norwegian hospital.** In: Øvretveit J, Sousa P, eds. *Quality and Safety*  
5 *Improvement Research: Methods and Research Practice from the International Quality*  
6 *Improvement Research Network (QIRN).* Lisbon: *National School of Public Health*  
7 *2008:173–86*
- 8  
9  
10  
11  
12  
13 21. Najjar S, Hamdan M, Baillan E, et al. **The Arabic version of the hospital survey on**  
14 **patient safety culture: a psychometric evaluation in a Palestinian sample.** *BMC*  
15 *Health Serv Res* 2013; **13**:193. doi: 10.1186/1472-6963-13-193.
- 16  
17  
18  
19  
20 22. Colla JB, Bracken AC, Kinney LM, et al. **Measuring patient safety climate: a**  
21 **review of surveys.** *Qual Saf Health Care* 2005; **14**:364–366.
- 22  
23  
24 23. Sexton JB, Helmreich RL, Neilands TB, et al. **The Safety Attitudes Questionnaire:**  
25 **Psychometric Properties, Benchmarking Data, and Emerging Research.** *BMC*  
26 *Health Serv Res* 2006; **6**:44.
- 27  
28  
29  
30  
31 24. Sammer CE, Lykens K, Singh KP, et al. **What is patient safety culture? A review of**  
32 **the literature.** *J Nurs Scholarsh* 2010; **42**(2):156–65.
- 33  
34  
35 25. Hellings J, Schrooten W, Klazinga N, Vleugels A. **Challenging patient safety**  
36 **culture: survey results.** *Int J Health Care Qual Assur.* 2007; **20**(7):620-32.
- 37  
38  
39  
40 26. Vlayen A, Hellings J, Claes N, Abdou EA, Schrooten W. **Measuring safety culture**  
41 **in belgian psychiatric hospitals: validation of the dutch and French translations**  
42 **of the hospital survey on patient safety culture.** *J Psychiatr Pract.* 2015; **21**(2):124-  
43 39.
- 44  
45  
46  
47  
48 27. Pfeiffer Y, Manser T. **Development of the German version of the Hospital Survey**  
49 **on Patient Safety Culture: Dimensionality and psychometric properties.** *Safety*  
50 *Science* 2010; **48** (10):1452–1462.
- 51  
52  
53  
54  
55  
56  
57  
58  
59  
60

- 1
  - 2
  - 3
  - 4
  - 5
  - 6
  - 7
  - 8
  - 9
  - 10
  - 11
  - 12
  - 13
  - 14
  - 15
  - 16
  - 17
  - 18
  - 19
  - 20
  - 21
  - 22
  - 23
  - 24
  - 25
  - 26
  - 27
  - 28
  - 29
  - 30
  - 31
  - 32
  - 33
  - 34
  - 35
  - 36
  - 37
  - 38
  - 39
  - 40
  - 41
  - 42
  - 43
  - 44
  - 45
  - 46
  - 47
  - 48
  - 49
  - 50
  - 51
  - 52
  - 53
  - 54
  - 55
  - 56
  - 57
  - 58
  - 59
  - 60
28. El-Jardali F, Jafar M, Dimmasi H, et al. **The current state of patient safety culture in Lebanese hospitals: a study at baseline.** *Int J Qual Health Care* 2010; **22**:386–95.
29. Hickner J, Smith SA, Yount N, et al **Differing perceptions of safety culture across job roles in the ambulatory setting: analysis of the AHRQ Medical Office Survey on Patient Safety Culture.** *BMJ Qual Saf* 2016 Aug; **25**(8):588-94.
30. Sorra JS, Nieva VF. **Hospital Survey on Patient Safety Culture.** AHRQ Publication No. 04-0041. Rockville, MD: Agency for Healthcare Research and Quality; 2004.
31. Hayes, A. F. Introduction to mediation, moderation, and conditional process analysis: A regression-based approach. New York, NY, US: Guilford Press 2017.
32. Westrum R, **A typology of organisational cultures.** *Qual Saf Health Care* 2004; **13** (Suppl. 2): pp. ii22–ii27.
33. Aiken A, Sermeus W, Van den Heede K, et al. **Patient safety, satisfaction, and quality of hospital care: cross sectional surveys of nurses and patients in 12 countries in Europe and the United States.** *BMJ* 2012; **344**:e1717doi: 10.1136/bmj.e1717.
34. Keller SM. **Effects of extended work shifts and shift work on patient safety, productivity, and employee health.** *AAOHN J* 2009; **57** (12):497–502
35. Mark BA, Harless DW and Berman WF. **Nurse Staffing and Adverse Events in Hospitalized Children.** *Policy Polit Nurs Pract* 2007; **8**(2): 83–92.
36. Stuart EA. **Matching methods for causal inference: A review and a look forward.** *Stat Sci* 2010; **25**(1):1–21

**Table 1:** Definitions of patient safety culture dimensions and outcomes

| Patient safety culture dimensions                                                                                                                                                       | Items                                                                                                                                                                                                                                                                                                                                                                                     |
|-----------------------------------------------------------------------------------------------------------------------------------------------------------------------------------------|-------------------------------------------------------------------------------------------------------------------------------------------------------------------------------------------------------------------------------------------------------------------------------------------------------------------------------------------------------------------------------------------|
| <p><b>Communication openness:</b> Staff freely speak up if they see something that may negatively affect a patient and feel free to question those with more authority.</p>             | <ul style="list-style-type: none"> <li>• Staff will freely speak up if they see something that may negatively affect patient care.</li> <li>• Staff feel free to question the decisions or actions of those with more authority.</li> <li>• Staff are afraid to ask questions when something does not seem right.</li> </ul>                                                              |
| <p><b>Feedback and communication about errors:</b> Staff are informed about errors that happen, given feedback about changes implemented, and discuss ways to prevent errors.</p>       | <ul style="list-style-type: none"> <li>• We are given feedback about changes put into place based on event reports.</li> <li>• We are informed about errors that happen in this unit.</li> <li>• In this unit, we discuss ways to prevent errors from happening again.</li> </ul>                                                                                                         |
| <p><b>Hospital handoffs and transitions:</b> Important patient care information is transferred across hospital units and during shift changes.</p>                                      | <ul style="list-style-type: none"> <li>• Things “fall between the cracks” when transferring patients from one unit to another.</li> <li>• Important patient care information is often lost during shift changes.</li> <li>• Problems often occur in the exchange of information across hospital units.</li> <li>• Shift changes are problematic for patients in this hospital.</li> </ul> |
| <p><b>Hospital management support for patient safety:</b> Hospital management provides a work climate that promotes patient safety and shows that patient safety is a top priority.</p> | <ul style="list-style-type: none"> <li>• Hospital management provides a work climate that promotes patient safety.</li> <li>• The actions of hospital management show that patient safety is a top priority.</li> <li>• Hospital management seems interested in patient safety only after an adverse event happens.</li> </ul>                                                            |
| <p><b>Non-punitive response to error:</b> Staff feel that their mistakes and event reports are not held against them and that mistakes are not kept in their file.</p>                  | <ul style="list-style-type: none"> <li>• Staff feel like their mistakes are held against them.</li> <li>• When an event is reported, it feels like the person is being written up, not the problem.</li> <li>• Staff worry that mistakes they make are kept in their file.</li> </ul>                                                                                                     |

|                                                                                                                                                                                                                                                              |                                                                                                                                                                                                                                                                                                                                                                                                                                                                                                   |
|--------------------------------------------------------------------------------------------------------------------------------------------------------------------------------------------------------------------------------------------------------------|---------------------------------------------------------------------------------------------------------------------------------------------------------------------------------------------------------------------------------------------------------------------------------------------------------------------------------------------------------------------------------------------------------------------------------------------------------------------------------------------------|
| <p><b>Organizational learning–Continuous improvement:</b> Mistakes have led to positive changes and changes are evaluated for effectiveness.</p>                                                                                                             | <ul style="list-style-type: none"> <li>• We are actively doing things to improve patient safety.</li> <li>• Mistakes have led to positive changes here.</li> <li>• After we make changes to improve patient safety, we evaluate their effectiveness.</li> </ul>                                                                                                                                                                                                                                   |
| <p><b>Staffing:</b> There is enough staff to handle the workload and work hours are appropriate to provide the best care for patients.</p>                                                                                                                   | <ul style="list-style-type: none"> <li>• We have enough staff to handle the workload.</li> <li>• Staff in this unit work longer hours than is best for patient care.</li> <li>• We use more agency/temporary staff than is best for patient care.</li> <li>• We work in ‘crisis mode’, trying to do too much, too quickly.</li> </ul>                                                                                                                                                             |
| <p><b>Supervisor/manager expectations and actions promoting safety:</b> Supervisors/managers consider staff suggestions for improving patient safety, praise staff for following patient safety procedures, and do not overlook patient safety problems.</p> | <ul style="list-style-type: none"> <li>• My supervisor/manager offers praise when he/she sees a job done according to established patient safety procedures.</li> <li>• My supervisor/manager seriously considers staff suggestions for improving patient safety.</li> <li>• Whenever pressure builds up, my supervisor/manager wants us to work faster, even if it means taking shortcuts.</li> <li>• My supervisor/manager overlooks patient safety problems that happen repeatedly.</li> </ul> |
| <p><b>Teamwork across hospital units:</b> Hospital units cooperate and coordinate with one another to provide the best care for patients.</p>                                                                                                                | <ul style="list-style-type: none"> <li>• There is good cooperation among hospital units that need to work together.</li> <li>• Hospital units work well together to provide the best care for patients.</li> <li>• Hospital units do not coordinate well with each other.</li> <li>• It is often unpleasant to work with staff from other hospital units.</li> </ul>                                                                                                                              |
| <p><b>Teamwork within hospital units:</b> Staff support each other, treat each other with respect, and work together as a team.</p>                                                                                                                          | <ul style="list-style-type: none"> <li>• People support one another in this unit.</li> <li>• When a lot of work needs to be done quickly, we work together as a team to get the work done.</li> <li>• In this unit, people treat each other with respect.</li> </ul>                                                                                                                                                                                                                              |

- When one area in this unit gets really busy, others help out.

| Self-reported outcome measures                                                                                                                                                                                                                                         | Items                                                                                                                                                                                                                                                                                                                                                                               |
|------------------------------------------------------------------------------------------------------------------------------------------------------------------------------------------------------------------------------------------------------------------------|-------------------------------------------------------------------------------------------------------------------------------------------------------------------------------------------------------------------------------------------------------------------------------------------------------------------------------------------------------------------------------------|
| <p><b>Frequency of events reported:</b> Mistakes of the following types are reported: (1) Mistakes caught and corrected before affecting the patient; (2) Mistakes with no potential to harm the patient; and (3) Mistakes that could harm the patient but do not.</p> | <ul style="list-style-type: none"> <li>• When a mistake is made, but is caught and corrected before affecting the patient, how often is this reported?</li> <li>• When a mistake is made, but has no potential to harm the patient, how often is this reported?</li> <li>• When a mistake is made that could harm the patient, but does not, how often is this reported?</li> </ul> |
| <p><b>Overall perceptions of patient safety:</b> Procedures and systems are good for the prevention of errors and there are minimal patient safety problems.</p>                                                                                                       | <ul style="list-style-type: none"> <li>• Patient safety is never sacrificed to get more work done.</li> <li>• Our procedures and systems are good for the prevention of errors.</li> <li>• It is just by chance that more serious mistakes don't happen around here.</li> <li>• We have patient safety problems in this unit.</li> </ul>                                            |
| <p><b>Patient safety grade:</b> Overall grade for patient safety for their work area/unit.</p>                                                                                                                                                                         | <ul style="list-style-type: none"> <li>• Please give your work area/unit in this hospital an overall grade for patient safety.</li> </ul>                                                                                                                                                                                                                                           |
| <p><b>Number of events reported:</b> The number of events reported over the past 12 months.</p>                                                                                                                                                                        | <ul style="list-style-type: none"> <li>• In the past 12 months, how many event reports have you filled out and submitted?</li> </ul>                                                                                                                                                                                                                                                |

**Table 2: Percentage positive scores for patient safety dimensions and Cronbach's alpha of Hospital survey on patient safety culture (HSOPSC) in Palestine and Belgium**

| <b>Patient safety culture dimensions</b>                            | <b>Percent positive response Palestine</b> | <b>Percent positive response Belgium</b> | <b>Cronbach's alpha Palestine</b> | <b>Cronbach's alpha Belgium</b> |
|---------------------------------------------------------------------|--------------------------------------------|------------------------------------------|-----------------------------------|---------------------------------|
| Teamwork within hospital units                                      | 75%                                        | 73%                                      | 0.80                              | 0.79                            |
| Organizational learning–<br>Continuous improvement                  | 64%                                        | 49%                                      | 0.73                              | 0.61                            |
| Supervisor/manager expectations<br>& actions promoting safety       | 55%                                        | 58%                                      | 0.74                              | 0.74                            |
| No punitive response to error                                       | 17%                                        | 38%                                      | 0.63                              | 0.69                            |
| Hospital management support for<br>patient safety                   | 42%                                        | 33%                                      | 0.76                              | 0.77                            |
| Teamwork across hospital units &<br>hospital handoffs & transitions | 45%                                        | 27%                                      | 0.78                              | 0.75                            |
| Staffing                                                            | 58%                                        | 37%                                      | 0.67                              | 0.61                            |
| Feedback & communication                                            | 49%                                        | 51%                                      | 0.76                              | 0.80                            |
| Openness about errors                                               |                                            |                                          |                                   |                                 |
| <b>Patient safety culture outcomes</b>                              |                                            |                                          |                                   |                                 |
| Frequency of event reporting                                        | 39%                                        | 44%                                      | 0.87                              | 0.86                            |
| Overall perceptions of safety                                       | 55%                                        | 47%                                      | 0.75                              | 0.73                            |
| Overall grade of patient safety                                     | 49%                                        | 39%                                      | NA                                | NA                              |
| Number of events reported                                           | 45%                                        | 69%                                      | NA                                | NA                              |

**Table 3: Participants' characteristics**

| Characteristics                            |                     | Whole sample | Palestinian sample<br>N = 1418 | Matched<br>Belgian sample<br>N = 1418 |
|--------------------------------------------|---------------------|--------------|--------------------------------|---------------------------------------|
| Direct contact or interaction with patient | Yes                 | 2524 (88.9%) | 1284 (90.5%)                   | 1240 (87.4%)                          |
|                                            | No                  | 312 (11.0%)  | 134 (9.4%)                     | 178 (12.5%)                           |
| Experience at current work area/unit       | <1 year             | 452 (15.9%)  | 218 (15.4%)                    | 234 (16.5%)                           |
|                                            | 1 to 5 years        | 1206 (42.5%) | 621 (43.8%)                    | 585 (41.3%)                           |
|                                            | 6 to 10 years       | 552 (19.5%)  | 250 (17.6%)                    | 302 (21.3%)                           |
|                                            | 11 to 15 years      | 281 (09.9%)  | 162 (11.4%)                    | 119 (8.4%)                            |
|                                            | 16 to 20 years      | 184 (06.5%)  | 81 (5.7%)                      | 104 (7.3%)                            |
|                                            | >21 years           | 160 (05.6%)  | 86 (6.1%)                      | 74 (5.2%)                             |
| Hospital size (beds)                       | Small (<150)        | 700 (24.7%)  | 612 (43.1%)                    | 88 (6.2%)                             |
|                                            | Medium (150 to 249) | 632 (22.3%)  | 546 (38.5%)                    | 86 (6.1%)                             |
|                                            | Large (≥250)        | 1504 (53.0%) | 260 (18.4%)                    | 1244 (87.7%)                          |



**Table 4: Spearman's correlation matrixes (Belgian sample above the diagonal, Palestinian sample below the diagonal)**

|                               | 1      | 2      | 3      | 4      | 5       | 6       | 7       | 8       | 9       | 10     | 11      | 12     | 13      | 14      |
|-------------------------------|--------|--------|--------|--------|---------|---------|---------|---------|---------|--------|---------|--------|---------|---------|
| 1. Hospital years' experience | –      | 0.01   | -0.05  | 0.06*  | -0.02   | -0.03   | 0.00    | -0.06*  | -0.09** | -0.00  | -0.08** | 0.04   | -0.06*  | 0.16**  |
| 2. Working hours              | 0.01   | –      | 0.03   | -0.03  | -0.02   | 0.02    | -0.09** | -0.07*  | -0.11** | 0.02   | 0.00    | -0.02  | -0.02   | 0.03    |
| 3. TW_units                   | -0.05  | 0.05*  | –      | 0.28** | 0.35**  | 0.33**  | 0.18**  | 0.21**  | 0.21**  | 0.42** | 0.29**  | 0.22** | 0.30**  | -0.05   |
| 4. OrgLearn                   | 0.00   | 0.09** | 0.35** | –      | 0.40**  | 0.24**  | 0.28**  | 0.17**  | 0.09**  | 0.43** | 0.29**  | 0.24** | 0.21**  | 0.10**  |
| 5. Sup./Man_actions           | -0.01  | 0.03   | 0.24** | 0.25** | –       | 0.34**  | 0.33**  | 0.22**  | 0.23**  | 0.51** | 0.41**  | 0.24** | 0.34**  | -0.04   |
| 6. NPRE                       | 0.03   | -0.03  | 0.07*  | 0.07** | 0.13**  | –       | 0.28**  | 0.20**  | 0.29**  | 0.32** | 0.30**  | 0.18** | 0.22**  | -0.00   |
| 7. HMS                        | -0.02  | 0.09** | 0.25** | 0.28** | 0.27**  | 0.25**  | –       | 0.33**  | 0.30**  | 0.35** | 0.39**  | 0.19** | 0.39**  | -0.07** |
| 8. TWacross_HHT               | -0.04  | 0.02   | 0.27** | 0.23** | 0.34**  | 0.21**  | 0.33**  | –       | 0.23**  | 0.24** | 0.28**  | 0.17** | 0.34**  | -0.11** |
| 9. Staff                      | -0.04  | -0.02  | -0.05  | -0.04  | 0.09**  | -0.12** | -0.08** | 0.01    | –       | 0.20** | 0.40**  | 0.05   | 0.35**  | -0.08** |
| 10. FB&ComE                   | -0.02  | 0.06*  | 0.31** | 0.33** | 0.32**  | 0.14**  | 0.31**  | 0.24**  | -0.03   | –      | 0.36**  | 0.41** | 0.38**  | 0.05    |
| 11. OPS                       | -0.02  | 0.06*  | 0.24** | 0.28** | 0.29**  | 0.11**  | 0.26**  | 0.24**  | 0.01    | 0.26** | –       | 0.20** | 0.51**  | -0.15** |
| 12. FER                       | 0.02   | 0.08** | 0.24** | 0.32** | 0.23**  | 0.13**  | 0.27**  | 0.28**  | 0.06*   | 0.37** | 0.23**  | –      | 0.21**  | 0.12**  |
| 13. OGPS                      | 0.09** | 0.17** | 0.22** | 0.32** | 0.25**  | 0.16**  | 0.25**  | 0.30**  | -0.05   | 0.22** | 0.19**  | 0.25** | –       | -0.12** |
| 14. NER                       | 0.00   | -0.01  | 0.01   | -0.03  | -0.11** | -0.07*  | -0.03   | -0.08** | -0.16** | 0.01   | -0.07** | 0.05*  | -0.09** | –       |

\*. Correlation is significant at the 0.05 level (2-tailed). \*\*. Correlation is significant at the 0.01 level (2-tailed).

**TW\_units**: Teamwork within hospital units; **OrgLearn**: Organizational learning–Continuous improvement; **Sup./Man\_actions**: Supervisor/manager expectations and actions promoting safety; **NPRE**: Non-punitive response to error; **HMS**: Hospital management support for patient safety; **TWacross\_HHT**: Teamwork across hospital units and hospital handoffs and transitions; **Staff**: Staffing; **FB&ComE**: Feedback and communication openness about error; **OPS**: Overall perceptions of patient safety; **FER**: Frequency of events reported; **OGPS**: Overall grade for patient safety; **NER**: Number of events reported.

**Table 5: Summary of the hierarchical regression analyses: Predicting the outcomes of the Hospital survey on patient safety culture (HSOPSC) in matched samples of Palestinian and Belgian hospital workers ( $\beta$ )**

| Outcome          | Palestine (N=1418)          |         |                    |         |                       |         |                  |         | Belgium (N=1418)            |         |                    |         |                       |         |                  |         |
|------------------|-----------------------------|---------|--------------------|---------|-----------------------|---------|------------------|---------|-----------------------------|---------|--------------------|---------|-----------------------|---------|------------------|---------|
|                  | Overall                     |         | Frequency of event |         | Overall grade for     |         | Number of events |         | Overall                     |         | Frequency of event |         | Overall grade for     |         | Number of events |         |
|                  | perceptions of safety (OPS) |         | reporting (FER)    |         | patient safety (OGPS) |         | reported (NER)   |         | perceptions of safety (OPS) |         | reporting (FER)    |         | patient safety (OGPS) |         | reported (NER)   |         |
| Predictors       | Step1                       | Step2   | Step1              | Step2   | Step1                 | Step2   | Step1            | Step2   | Step1                       | Step2   | Step1              | Step2   | Step1                 | Step2   | Step1            | Step2   |
| Hospital tenure  | -0.01                       | -0.00   | 0.02               | 0.04    | 0.09***               | 0.09*** | .01              | .01     | -0.06**                     | -0.04*  | 0.04               | 0.04    | -0.04                 | -0.02   | 0.15***          | 0.13*** |
| Working hours    | 0.06**                      | 0.04    | 0.07**             | 0.04    | 0.15***               | 0.12*** | -0.02            | -0.02   | -0.00                       | 0.04    | -0.03              | -0.03   | -0.02                 | 0.03    | 0.03             | 0.02    |
| Staff function   | 0.04                        | 0.00    | 0.03               | -0.01   | 0.03                  | 0.00    | -0.00            | .01     | 0.09***                     | 0.06**  | -0.04              | -0.04   | 0.06                  | 0.04    |                  | 0.08**  |
| TW_units         |                             | 0.10*** |                    | 0.04    |                       | 0.03    |                  | .04     |                             | 0.06**  |                    | 0.02    |                       | 0.11*** |                  | -0.07*  |
| OrgLearn         |                             | 0.10*** |                    | 0.14*** |                       | 0.19*** |                  | -.03    |                             | 0.10*** |                    | 0.04    |                       | -0.00   |                  | 0.09**  |
| Sup./Man_actions |                             | 0.13*** |                    | 0.00    |                       | 0.14*** |                  | -.16*** |                             | 0.17*** |                    | 0.00    |                       | 0.12*** |                  | -0.08*  |
| NPRE             |                             | 0.05    |                    | 0.03    |                       | 0.09*** |                  | -.08**  |                             | 0.03    |                    | 0.04    |                       | -0.03   |                  | 0.04    |
| HMS              |                             | 0.16*** |                    | 0.10*** |                       | 0.05    |                  | .01     |                             | 0.19*** |                    | 0.04    |                       | 0.17*** |                  | -0.07*  |
| TWacross_HHT     |                             | 0.07**  |                    | 0.13*** |                       | 0.14*** |                  | -.05    |                             | 0.08**  |                    | 0.06*   |                       | 0.17*** |                  | -0.08** |
| Staff            |                             | 0.02    |                    | 0.09*** |                       | -0.01   |                  | -.20*** |                             | 0.24*** |                    | -0.07** |                       | 0.19*** |                  | -0.05   |
| FB&ComE          |                             | 0.08**  |                    | 0.24*** |                       | 0.01    |                  | .05*    |                             | 0.06*   |                    | 0.35*** |                       | 0.15*** |                  | 0.11**  |
| R <sup>2</sup>   | .00                         | 0.16*** | .00*               | 0.22*** | 0.03***               | 0.20*** | -0.00            | 0.01**  | 0.00***                     | 0.36*** | 0.00               | 0.18*** | 0.00                  | 0.33*** | 0.02***          | 0.05*** |

The highest absolute values of the standardized beta are shaded. \*  $P < 0.05$ ; \*\*  $P < 0.01$ ; \*\*\*  $P < 0.001$

**TW\_units**: Teamwork within hospital units; **OrgLearn**: Organizational learning–Continuous improvement; **Sup./Man\_actions**: Supervisor/manager expectations and actions promoting safety; **NPRE**: Non-punitive response to error; **HMS**: Hospital management support for patient safety; **TWacross\_HHT**: Teamwork across hospital units and hospital handoffs and transitions; **Staff**: Staffing; **FB&ComE**: Feedback and communication openness about error; **OPS**: Overall perceptions of patient safety; **FER**: Frequency of events reported; **OGPS**: overall grade of patient safety; **NER**: Number of events reported.

STROBE 2007 (v4) Statement—Checklist of items that should be included in reports of *cross-sectional studies*

**Similarities and differences in the associations between patient safety culture dimensions and self-reported outcomes in two different culture settings: A national cross-sectional study in Palestinian and Belgian hospitals**

| Section/Topic             | Item # | Recommendation                                                                                                                                                                       | Reported on page # |
|---------------------------|--------|--------------------------------------------------------------------------------------------------------------------------------------------------------------------------------------|--------------------|
| Title and abstract        | 1      | (a) Indicate the study’s design with a commonly used term in the title or the abstract                                                                                               | 1 & 3              |
|                           |        | (b) Provide in the abstract an informative and balanced summary of what was done and what was found                                                                                  | 3                  |
| <b>Introduction</b>       |        |                                                                                                                                                                                      |                    |
| Background/rationale      | 2      | Explain the scientific background and rationale for the investigation being reported                                                                                                 | 6                  |
| Objectives                | 3      | State specific objectives, including any prespecified hypotheses                                                                                                                     | 6                  |
| <b>Methods</b>            |        |                                                                                                                                                                                      |                    |
| Study design              | 4      | Present key elements of study design early in the paper                                                                                                                              | 7                  |
| Setting                   | 5      | Describe the setting, locations, and relevant dates, including periods of recruitment, exposure, follow-up, and data collection                                                      | 7 & 8              |
| Participants              | 6      | (a) Give the eligibility criteria, and the sources and methods of selection of participants                                                                                          | 7 & 8              |
| Variables                 | 7      | Clearly define all outcomes, exposures, predictors, potential confounders, and effect modifiers. Give diagnostic criteria, if applicable                                             | 9                  |
| Data sources/ measurement | 8*     | For each variable of interest, give sources of data and details of methods of assessment (measurement). Describe comparability of assessment methods if there is more than one group | 8 & 9              |
| Bias                      | 9      | Describe any efforts to address potential sources of bias                                                                                                                            | 9                  |
| Study size                | 10     | Explain how the study size was arrived at                                                                                                                                            | 8                  |
| Quantitative variables    | 11     | Explain how quantitative variables were handled in the analyses. If applicable, describe which groupings were chosen and why                                                         | 9                  |
| Statistical methods       | 12     | (a) Describe all statistical methods, including those used to control for confounding                                                                                                | 10 & 11            |

|                          |     |                                                                                                                                                                                                              |         |
|--------------------------|-----|--------------------------------------------------------------------------------------------------------------------------------------------------------------------------------------------------------------|---------|
|                          |     | (b) Describe any methods used to examine subgroups and interactions                                                                                                                                          | 10      |
|                          |     | (c) Explain how missing data were addressed                                                                                                                                                                  | NA      |
|                          |     | (d) If applicable, describe analytical methods taking account of sampling strategy                                                                                                                           | 10 & 11 |
|                          |     | (e) Describe any sensitivity analyses                                                                                                                                                                        | NA      |
| <b>Results</b>           |     |                                                                                                                                                                                                              |         |
| Participants             | 13* | (a) Report numbers of individuals at each stage of study—eg numbers potentially eligible, examined for eligibility, confirmed eligible, included in the study, completing follow-up, and analysed            | 10      |
|                          |     | (b) Give reasons for non-participation at each stage                                                                                                                                                         | NA      |
|                          |     | (c) Consider use of a flow diagram                                                                                                                                                                           | NA      |
| Descriptive data         | 14* | (a) Give characteristics of study participants (eg demographic, clinical, social) and information on exposures and potential confounders                                                                     | 11      |
|                          |     | (b) Indicate number of participants with missing data for each variable of interest                                                                                                                          | NA      |
| Outcome data             | 15* | Report numbers of outcome events or summary measures                                                                                                                                                         | 12 – 14 |
| Main results             | 16  | (a) Give unadjusted estimates and, if applicable, confounder-adjusted estimates and their precision (eg, 95% confidence interval). Make clear which confounders were adjusted for and why they were included | 12 – 14 |
|                          |     | (b) Report category boundaries when continuous variables were categorized                                                                                                                                    | NA      |
|                          |     | (c) If relevant, consider translating estimates of relative risk into absolute risk for a meaningful time period                                                                                             | NA      |
| Other analyses           | 17  | Report other analyses done—eg analyses of subgroups and interactions, and sensitivity analyses                                                                                                               | 12 – 14 |
| <b>Discussion</b>        |     |                                                                                                                                                                                                              |         |
| Key results              | 18  | Summarise key results with reference to study objectives                                                                                                                                                     | 14      |
| Limitations              | 19  | Discuss limitations of the study, taking into account sources of potential bias or imprecision. Discuss both direction and magnitude of any potential bias                                                   | 17 - 18 |
| Interpretation           | 20  | Give a cautious overall interpretation of results considering objectives, limitations, multiplicity of analyses, results from similar studies, and other relevant evidence                                   | 15-18   |
| Generalisability         | 21  | Discuss the generalisability (external validity) of the study results                                                                                                                                        | 18      |
| <b>Other information</b> |     |                                                                                                                                                                                                              |         |
| Funding                  | 22  | Give the source of funding and the role of the funders for the present study and, if applicable, for the original study on which the present article is based                                                | NA      |

\*Give information separately for cases and controls in case-control studies and, if applicable, for exposed and unexposed groups in cohort and cross-sectional studies.

1  
2  
3  
4  
5  
6  
7  
8  
9  
10  
11  
12  
13  
14  
15  
16  
17  
18  
19  
20  
21  
22  
23  
24  
25  
26  
27  
28  
29  
30  
31  
32  
33  
34  
35  
36  
37  
38  
39  
40  
41  
42  
43  
44  
45  
46  
47

**Note:** An Explanation and Elaboration article discusses each checklist item and gives methodological background and published examples of transparent reporting. The STROBE checklist is best used in conjunction with this article (freely available on the Web sites of PLoS Medicine at <http://www.plosmedicine.org/>, Annals of Internal Medicine at <http://www.annals.org/>, and Epidemiology at <http://www.epidem.com/>). Information on the STROBE Initiative is available at [www.strobe-statement.org](http://www.strobe-statement.org).

For peer review only

# BMJ Open

## Similarities and differences in the associations between patient safety culture dimensions and self-reported outcomes in two different culture settings: A national cross-sectional study in Palestinian and Belgian hospitals

|                                 |                                                                                                                                                                                                                                                                                                                                                                                                                                                                                                                                                                                                                                                                                                                                                                                                                                                                                                                                                                          |
|---------------------------------|--------------------------------------------------------------------------------------------------------------------------------------------------------------------------------------------------------------------------------------------------------------------------------------------------------------------------------------------------------------------------------------------------------------------------------------------------------------------------------------------------------------------------------------------------------------------------------------------------------------------------------------------------------------------------------------------------------------------------------------------------------------------------------------------------------------------------------------------------------------------------------------------------------------------------------------------------------------------------|
| Journal:                        | <i>BMJ Open</i>                                                                                                                                                                                                                                                                                                                                                                                                                                                                                                                                                                                                                                                                                                                                                                                                                                                                                                                                                          |
| Manuscript ID                   | bmjopen-2018-021504.R2                                                                                                                                                                                                                                                                                                                                                                                                                                                                                                                                                                                                                                                                                                                                                                                                                                                                                                                                                   |
| Article Type:                   | Research                                                                                                                                                                                                                                                                                                                                                                                                                                                                                                                                                                                                                                                                                                                                                                                                                                                                                                                                                                 |
| Date Submitted by the Author:   | 20-May-2018                                                                                                                                                                                                                                                                                                                                                                                                                                                                                                                                                                                                                                                                                                                                                                                                                                                                                                                                                              |
| Complete List of Authors:       | Najjar, Shahenaz; King Abdullah International Medical Research Center, Population Health Department – Hospital - MNG-HA.; KU Leuven, Health Service Research Group, School of Public Health<br>Baillien, Elfi; Katholieke Universiteit Leuven, Marketing and Organisation Studies (MO)<br>Vanhaecht, Kris; KU Leuven, Institute for Healthcare Policy<br>Hamdan, Motasem ; Al Quds University Faculty of Medicine, Public Health<br>Euwema, Martin; KU Leuven , Occupational & Organisational Psychology and Professional Learning<br>Vleugels, Arthur; KU Leuven, Health Service Research Group, School of Public Health<br>Sermeus, Walter; KU Leuven, Health Service Research Group, School of Public Health<br>Schrooten, Ward; Universiteit Hasselt Faculteit Geneeskunde en Levenswetenschappen<br>Hellings , J; Universiteit Hasselt Faculteit Geneeskunde en Levenswetenschappen<br>Vlayen, A; Universiteit Hasselt Faculteit Geneeskunde en Levenswetenschappen |
| <b>Primary Subject Heading</b>: | Health services research                                                                                                                                                                                                                                                                                                                                                                                                                                                                                                                                                                                                                                                                                                                                                                                                                                                                                                                                                 |
| Secondary Subject Heading:      | Health services research, Public health, Health policy                                                                                                                                                                                                                                                                                                                                                                                                                                                                                                                                                                                                                                                                                                                                                                                                                                                                                                                   |
| Keywords:                       | Health & safety < HEALTH SERVICES ADMINISTRATION & MANAGEMENT, Organisation of health services < HEALTH SERVICES ADMINISTRATION & MANAGEMENT, Quality in health care < HEALTH SERVICES ADMINISTRATION & MANAGEMENT, Risk management < HEALTH SERVICES ADMINISTRATION & MANAGEMENT, Public health < INFECTIOUS DISEASES                                                                                                                                                                                                                                                                                                                                                                                                                                                                                                                                                                                                                                                   |
|                                 |                                                                                                                                                                                                                                                                                                                                                                                                                                                                                                                                                                                                                                                                                                                                                                                                                                                                                                                                                                          |

SCHOLARONE™  
Manuscripts

1  
2  
3  
4 **Similarities and differences in the associations between patient**  
5 **safety culture dimensions and self-reported outcomes in two**  
6 **different culture settings: A national cross-sectional study in**  
7 **Palestinian and Belgian hospitals**  
8  
9

10  
11 Shahenaz Najjar, Elfi Baillien, Kris Vanhaecht, Motasem Hamdan, Martin Euwema, Arthur  
12  
13 Vleugels, Walter Sermeus, Ward Schrooten, Johan Hellings, Annemie Vlayen  
14  
15

16  
17  
18 **Corresponding author: Dr. Shahenaz Najjar**  
19

20 King Abdullah International Medical Research Center/King Saud bin Abdulaziz University  
21  
22 for Health Sciences, Population Health Department – Hospital - MNG-HA.  
23  
24

25  
26  
27 Address:

28  
29 Population Health Research Section  
30

31 King Abdullah International Medical Research Center (KAIMRC new building)  
32

33 King Saud Bin Abdulaziz University for Health Sciences  
34

35 King Abdulaziz Medical City, Riyadh  
36

37 Ministry of National Guard - Health Affairs  
38

39 P.O. Box 3660, Riyadh 11481, Saudi Arabia  
40

41 Mail Code: 1515 (KAIMRC)  
42  
43

44 Tel: +966 11 429 4444 Ext. 94372  
45

46 e-mail: [shnajjar@gmail.com](mailto:shnajjar@gmail.com)  
47

48 Fax: +966 (11) 80 43050, +966(11) 429-4440  
49  
50

51  
52  
53 Dr. Elfi Baillien: University of Leuven, Brussels, Belgium  
54

55 Dr. Kris Vanhaecht: University of Leuven, Leuven, Belgium  
56  
57  
58  
59  
60

1  
2  
3 Dr. Motasem Hamdan: Al-Quds University, Jerusalem, Palestine

4  
5 Dr. Martin Euwema: University of Leuven, Leuven, Belgium

6  
7 Dr. Arthur Vleugels: University of Leuven, Leuven, Belgium

8  
9 Dr. Walter Sermeus: University of Leuven, Leuven, Belgium

10  
11 Dr. Ward Schrooten: University of Hasselt, Diepenbeek, Belgium

12  
13 Dr. Johan Hellings: University of Hasselt, Diepenbeek, Belgium

14  
15 Dr. Annemie Vlayen: University of Hasselt, Diepenbeek, Belgium

16  
17  
18  
19  
20 **Key words:** Patient safety, patient safety culture, health services, Palestine, Belgium.

21  
22  
23  
24 **Word count (excluding title page, reference, figures):**

- 25  
26 - **Abstract: 300**
- 27  
28 - **Strengths and limitations of this study: 118**
- 29  
30 - **Main manuscript: 4336**
- 31  
32  
33  
34  
35  
36  
37  
38  
39  
40  
41  
42  
43  
44  
45  
46  
47  
48  
49  
50  
51  
52  
53  
54  
55  
56  
57  
58  
59  
60



## Abstract

**Objectives:** To investigate the relationships between patient safety culture (PSC) dimensions and PSC self-reported outcomes across different cultures and to gain insights in cultural differences regarding patient safety culture.

**Design:** Observational, cross-sectional study.

**Setting:** Ninety Belgian hospitals and 13 Palestinian hospitals.

**Participants:** A total of 2,836 healthcare professionals matched for profession, tenure and working hours.

**Primary and secondary outcome measures:** The validated versions of the Belgian and Palestinian Hospital Survey on Patient Safety Culture (HSOPSC) were used. An exploratory factor analysis was conducted. Reliability was tested using Cronbach's alpha ( $\alpha$ ). In this study, we examined the specific predictive value of the PSC dimensions and its self-reported outcome measures across different cultures and countries. Hierarchical regression and bivariate analyses were performed.

**Results:** Eight PSC dimensions and four PSC self-reported outcomes were distinguished in both countries. Cronbach's alpha was  $\alpha \geq 0.60$ . Significant correlations were found between PSC dimensions and its self-reported outcome ( $P$ -value range  $<0.05$  to  $<0.001$ ). Hierarchical regression analyses showed overall perception of safety was highly predicted by hospital management support in Palestine ( $\beta=0.16$ ,  $P<0.001$ ), and staffing in Belgium ( $\beta=0.24$ ,  $P<0.001$ ). The frequency of events was largely predicted by feedback and communication in both countries (Palestine:  $\beta=0.24$ ,  $P<0.001$ ; Belgium:  $\beta=0.35$ ,  $P<0.001$ ). Overall grade for patient safety was predicted by organizational learning in Palestine ( $\beta=0.19$ ,  $P<0.001$ ) and staffing in Belgium ( $\beta=0.19$ ,  $P<0.001$ ). Number of events reported was predicted by staffing in Palestine ( $\beta=-0.20$ ,  $P<0.001$ ) and feedback and communication in Belgium ( $\beta=0.11$ ,  $P<0.01$ ).

1  
2  
3 **Conclusion:** To promote patient safety in Palestine and Belgium, staffing and communication  
4 regarding errors should be improved in both countries. Initiatives to improve hospital  
5 management support and establish constructive learning systems would be especially  
6 beneficial for patient safety in Palestine. Future research should address the association  
7 between safety culture and hard patient safety measures such as patient outcomes.  
8  
9  
10  
11  
12

### 13 14 15 **Strengths and limitations of this study**

- 16 • Our study enables us to draw conclusions regarding the varying associations among  
17 PSC dimensions and self-reported patient safety outcomes across different cultural  
18 settings.  
19
- 20 • This is the first study to explore the predictive value of the HSOPSC in matched  
21 samples from two different countries.  
22
- 23 • Using a matched samples study design is useful, allowing researchers to establish a  
24 good degree of validity and to investigate a rationalized and focused research question.  
25
- 26 • Our results verify the international and cross-cultural validity of the HSOPSC;  
27 however, more studies are needed to provide further evidence in this regard.  
28
- 29 • Our study relied exclusively on subjective self-reported measures; future research on  
30 linking actual adverse events data with PSC dimensions objectively is required to  
31 clarify this relationship.  
32  
33  
34  
35  
36  
37  
38  
39  
40  
41  
42  
43  
44  
45  
46  
47  
48  
49  
50  
51  
52  
53  
54  
55  
56  
57  
58  
59  
60

## Background

Patient safety is a major focus in the improvement of the quality of healthcare [1-3]. This has led to an increased interest in patient safety culture (PSC) assessments in healthcare organizations [4]. Clinical outcomes and adverse event rates have been used as indicators of patient safety in previous studies [5]. Earlier research has demonstrated a link between organizational culture and hospital outcomes, adverse event rates [6-8], financial performance [9] or patient satisfaction [10]. The development of a positive PSC may help to integrate the concern for safety into the daily functioning of organizations and into the routines of individuals and teams [6]. In this study, PSC is defined as the presence of values, beliefs, norms, behaviors and attitudes that may contribute to patient safety [11]. Hospitals that invest in PSC may enable staff not only to prevent and solve safety problems, but also to learn collectively from problems that occur at the frontline of healthcare delivery [8,12,13]. Several studies have highlighted the perception of patient safety and staff attitudes toward safety [14-16]. Others have reported on the psychometric evaluation of PSC tools [17-21].

A range of tools has been developed to measure PSC; like, PSC in healthcare organizations, hospital surveys on patient safety and safety attitude questionnaires [22,23]. These instruments can be used to elicit patient safety-related assessments by healthcare staff at: (1) a hospital level, (2) a unit level and (3) a professional level [16,24]. The original American Hospital Survey on Patient Safety Culture (HSOPSC) was released by the Agency for Healthcare Research and Quality in November 2004. The survey is one of the most commonly applied instruments for the assessment of PSC. Moreover, it has been widely translated and validated in several languages and countries, including Belgium, England, Norway, Scotland, the Netherlands and Palestine [17-21,25,26]. The survey is intended to help hospitals assess the extent to which their cultures emphasize the importance of patient safety, encourage both

1  
2  
3 the reporting and open discussion of errors, and create an atmosphere of continuous learning  
4  
5 and improvement.  
6

7 The original HSOPSC consists of 42 items loading on 12 dimensions: two outcome  
8  
9 dimensions and 10 safety dimensions. The 10 different PSC dimensions are expected to have  
10  
11 strong relationships with the two composite outcome dimensions (frequency with events  
12  
13 reported and overall perceptions of patient safety) and the two single-item outcomes (Patient  
14  
15 safety grade and number of events reported) [14,17]. The four outcomes are self-reported  
16  
17 patient safety outcomes.  
18

19  
20 Despite efforts to measure PSC in terms of dimensions and outcomes to improve patient  
21  
22 safety, few studies have examined the specific predictive value of the dimensions in terms of  
23  
24 HSOPSC outcomes [17,20,27]. Research to date has not detailed the relationships between  
25  
26 the HSOPSC dimensions and its self-reported outcome measures across countries. Being part  
27  
28 of this patient safety collaborative project between Palestinian and Belgian academic  
29  
30 institutions allowed us to do this comparison. The two health care systems are different, one  
31  
32 from developed countries (Belgium), having universal coverage, higher spending per capita,  
33  
34 higher human resources ratios and system functioning in stable conditions compared to  
35  
36 another system from a developing country (Palestine) that has national insurance system with  
37  
38 high out-of-pocket spending (40%), especially for pharmaceuticals, lower physician density  
39  
40 (1.6 in Palestine comparing to 2.96 in Belgium per 1000 inhabitants), and lower density of  
41  
42 practicing nurses (3.0 to 9.51 per 1000 population). [28,29,30] Despite these differences, both  
43  
44 countries have ongoing initiatives to improve patient safety of care. The governments of  
45  
46 Belgium and Palestine promote the HSOPSC as a tool to support assessing patient safety  
47  
48 culture and providing baseline data to support the development of patient safety interventions  
49  
50 or initiatives in hospitals. Our study included hospitals that are operated in both governmental  
51  
52 and non-governmental sectors in Belgium and Palestine. We assumed that there were no staff-  
53  
54  
55  
56  
57  
58  
59  
60

1  
2  
3 related differences that would influence the PSC between the two countries. Both  
4  
5 governments have called for further investigations into the effectiveness of the HSOPSC  
6  
7 within and between different cultural contexts [15]. Thus, the first aim of this study was to  
8  
9 determine which HSOPSC dimensions are associated with self-reported outcome measures.  
10  
11 Second, we aimed to investigate the impact of cultural context on these associations. These  
12  
13 findings offer further insights into the similarities and differences regarding associations  
14  
15 between the PSC dimensions and outcomes of hospital workers in two very different cultural  
16  
17 settings. The results also further attest to the value of the HSOPSC to increase patient safety  
18  
19 in a range of settings.  
20  
21

## 22 23 **Methods**

### 24 25 26 **Design, setting and sample**

27  
28 A cross-sectional study design was used. In total, 90 acute Belgian hospitals and 13  
29  
30 Palestinian hospitals were included in the study. In Belgium, workshops were organized for  
31  
32 participating hospitals in which the objectives and survey were explained. The Dutch and  
33  
34 French validated versions of the HSOPSC were distributed organization-wide to 90 acute  
35  
36 hospitals that participated in a federal patient safety program between 2007 and 2009  
37  
38 (baseline PSC measurement [15,25,26]). These hospitals comprised 58 Dutch-speaking  
39  
40 hospitals, 31 French-speaking hospitals and one that was both Dutch- and French-speaking. In  
41  
42 total, 68 hospitals used a paper-based survey, 15 used an electronic survey and seven applied  
43  
44 a mixed method for survey administration. Technical assistance was available during the  
45  
46 periods of data collection. Hospitals were invited to participate in a Belgian comparative  
47  
48 study on a voluntary, confidential and free-of-charge basis. A total of 91,852 questionnaires  
49  
50 were distributed, of which 47,648 were returned (response rate 51.9%). The comparative  
51  
52  
53  
54  
55  
56  
57  
58  
59  
60

1  
2  
3 database was managed by a neutral academic institution and was not accessible to government  
4  
5 authorities.

6  
7 In Palestine, PSC baseline data were collected from September 2010 to August 2011 in  
8  
9 13 hospitals: 11 public hospitals and two general non-governmental hospitals situated in the  
10  
11 West Bank. All hospitals were Arabic-speaking and used a validated paper-based Arabic  
12  
13 language survey [21]. Workshops were organized at the participating hospitals to explain the  
14  
15 objectives and survey. A paper version of the questionnaire was distributed and participants  
16  
17 were informed about the purpose of the study. They were also told that their participation was  
18  
19 anonymous, voluntary and confidential. Technical assistance was accessible during the  
20  
21 periods of data collection. A total of 3,153 questionnaires were distributed, of which 1,690  
22  
23 were returned (response rate 53.6%), of which 1,418 could be used for this study. The  
24  
25 collected database was managed by an independent academic institution.  
26  
27

28  
29 For both the Belgian and Palestinian samples, the survey was distributed anonymously to  
30  
31 all healthcare staff that had direct (physicians, nurses, clinical staff, pharmacists, radiology  
32  
33 staff and laboratory staff) or indirect (all hospital supervisors, managers, administrators, and  
34  
35 support and administrative staff) interaction with patients. The survey was self-administered  
36  
37 and then placed in sealed envelopes without any respondent identification. Collection  
38  
39 points/boxes were identified for returning the completed questionnaires.  
40

41  
42 For the purposes of this study, the Belgian sample was matched to the Palestinian sample  
43  
44 by selecting a matched subsample based on staff position, years of experience at the hospital  
45  
46 and number of hours worked per week. Specifically, we used the Palestinian set ( $N = 1,418$ )  
47  
48 to randomly (blind) select 1:1 matching participants regarding position, tenure and working  
49  
50 hours from the Belgian sample. When more than one matching participant was identified, we  
51  
52 randomly (blind) selected one of the participants that fitted the criteria. The matched sample  
53  
54 was selected manually by the data management department.  
55  
56  
57

1  
2  
3 The Belgian and Palestinian samples consisted of a total of 2,836 healthcare staff (1,418  
4 respondents from each country). The subsample comprised the following staff categories:  
5 nurses (38.6%), head nurses (9.4%), nursing aid staff (5.7%), physicians (17.9%), pharmacists  
6 (2.9%) and other healthcare staff (25.5%). The sample hospitals ranged in size from small  
7 (fewer than 150 beds) to large (more than 200 beds). The research was fully supported and  
8 ethically approved by the Departments of Health of the Belgian and Palestinian governments,  
9 and all the hospitals approached participated in our study.  
10  
11  
12  
13  
14  
15  
16

### 17 **Funding statement**

18 This research received no specific grant from any funding agency in the public, commercial or  
19 not-for-profit sectors.  
20  
21  
22  
23  
24

### 25 **Instruments and measures**

26 The HSOPSC consists of 42 items and is designed to measure 10 PSC dimensions and four  
27 outcome measures. Items are scored on a 5-point Likert scale ranging from 1 = 'strongly  
28 disagree' to 5 = 'strongly agree' or from 1 = 'never' to 5 = 'always'. Respondents were also  
29 asked to provide some demographic information (e.g., their work area/unit, staff position,  
30 whether they have direct interaction with patients) [14]. PSC dimensions and self-reported  
31 outcomes are shown in Table 1.  
32  
33  
34  
35  
36  
37  
38  
39

40 Using the matched samples from both countries, the relationships between all dimensions  
41 and outcomes of the HSOPSC were assessed. Five-point response scales were used (1 =  
42 'strongly disagree' to 5 = 'strongly agree').  
43  
44  
45  
46

### 47 *Independent variables*

48 For both samples, the PSC dimensions shown in Table 1 were used. All PSC dimensions  
49 consist of multiple items.  
50  
51  
52

### 53 *Dependent variables*

1  
2  
3 Four self-reported outcome measures were used as dependent variables (Table 1). Two  
4  
5 composite outcomes have multiple items scored on a 5-point Likert scale, of which the labels  
6  
7 vary throughout the dimensions as follows: (1) frequency with events reported from 1 =  
8  
9 ‘strongly disagree’ to 5 = ‘strongly agree’; and (2) overall perceptions of patient safety from 1  
10  
11 = ‘never’ to 5 = ‘always’. Patient safety grade and number of events are ordinal, ranging from  
12  
13 1 to 5 (1 = ‘failing’ to 5 = ‘excellent’) and from 1 to 6 (1 = ‘no event’ to 6 = ‘more than 21  
14  
15 events’), respectively; both are single-item measures.  
16

### 17 *Control variables*

18  
19 The following controls were measured in both samples: staff position is categorical; years of  
20  
21 working experience at the hospital is numerical, ranging from 1 to 6 (1 = ‘less than 1 year’ to  
22  
23 6 = ‘21 years or more’); and number of hours worked per week is numerical, ranging from 1  
24  
25 to 6 (1 = ‘less than 20 hours per week to 6 = ‘100 hours or more per week’). The control  
26  
27 variables were selected based on previous research and/or their significant correlations with  
28  
29 the outcomes [31,32].  
30  
31  
32

### 33 **Statistical analysis**

34  
35 A total of 2,836 healthcare staff participated in the study. For the purposes of our analysis,  
36  
37 negatively worded items were reversed coded so that a higher score reflected a more positive  
38  
39 response. First, we conducted exploratory factor analyses (EFA) using the Palestinian and  
40  
41 matched Belgian data to test whether we could detect the same dimension structure in both  
42  
43 samples. We aimed for acceptable levels of reliability (Cronbach’s  $\alpha \geq 0.60$ ) as recommended  
44  
45 in the HSOPSC user guide [33]. Based on the EFA analyses, we optimized the model by  
46  
47 defining 10 PSC dimensions instead of the original 12 HSOPSC dimensions in both the  
48  
49 Palestinian and Belgian data. Four original dimensions were revealed as two dimensions. One  
50  
51 combined ‘communication openness’ and ‘feedback about error’ in one dimension and the  
52  
53 other combined ‘teamwork across hospital units’ and ‘hospital handoffs and transitions’  
54  
55  
56  
57



1  
2  
3 (Table 2). The other two outcome measures were individual items: ‘patient safety grade’ and  
4  
5 ‘number of events reported’. Cronbach’s  $\alpha$  values for both the Palestinian and Belgian  
6  
7 databases are presented in Table 2.  
8

9  
10 Second, we conducted hierarchical regression analyses for both the Palestinian and  
11  
12 Belgian samples using IBM SPSS version 20.0 (SPSS Inc., Chicago, IL, USA). Regression  
13  
14 Analyses are particularly suitable for analyses of variance in which we aim to test whether  
15  
16 and to what extent the variance on the dependent variables (and as reported by the  
17  
18 respondents) can be explained by the independent variables; which is reflected by  $R^2$ . By  
19  
20 including hierarchical analyses, we are able to detect how much extra variance ( $R^2$  change) in  
21  
22 the PSC outcomes is explained by introducing the PSC dimension in the analyses on top of  
23  
24 the control variables [34]. A composite average score was generated by calculating the  
25  
26 average responses to the items within a dimension. As 5-point response scales were used, the  
27  
28 composite scores generated were any value between 1 and 5. Regression analyses were  
29  
30 conducted to determine the extent to which the PSC dimensions (modeled as independent  
31  
32 variables) predicted the four self-reported dimensions (modeled as dependent variables).  
33  
34 Multiple R ( $R^2$ ) was used to indicate the proportion of variance explained by the model. An  
35  
36 indication of the predictive value of the PSC dimensions was confirmed using standardized  
37  
38 beta values ( $\beta$ ). A standardized beta coefficient is a standardized partial correlation coefficient  
39  
40 that allows us to compare the strength of the effect of each predictor/independent variable in  
41  
42 predicting the outcome/dependent variable, with higher absolute values of the beta coefficient  
43  
44 indicating a stronger effect. Based on their significant correlation with the four outcomes over  
45  
46 the Palestine and Belgian samples, the following controls were used in all regression analyses:  
47  
48 experience at hospital (years), working hours (hours) and staff position. The control variables  
49  
50 included in both countries were consistent to assure we could compare the results.  
51  
52  
53  
54  
55  
56  
57  
58  
59  
60

### **Data sharing statement**

The data that support the findings of this study are available from the correspondent author upon reasonable request and with permission of University of Leuven and University of Hasselt.

### **Patient and public involvement**

Patient and public were not involved in the study.

### **Ethical approval**

To ensure the privacy of the respondents, the survey was conducted anonymously. The researchers obtained ethical approval from the Departments of Health of the Belgian and Palestinian governments and institutional permits from the participating hospitals. Formal ethical approval and informed patient consent were not necessary for this type of study.

## **Results**

### **Participants' characteristics**

Most participants were nurses 761 (53.7%) and 254 (17.9%) were physicians. Most of the participants had between 1 and 5 years of experience in their current work unit. Details of the matched sample and participants' characteristics for both Palestinian and Belgian respondents are described in Table 3.

### **Correlation between PSC dimensions and outcomes of the HSOPSC**

Table 4 presents the results of two correlation tables; namely, Palestinian correlations shown below the diagonal and Belgian correlations above. Preliminary Spearman's correlation analyses (Table 4) revealed some differences between the Palestinian and Belgian samples. The analyses showed significant positive correlations between overall perceptions of patient safety (OPS) and most of the dimensions in both samples. Regarding the frequency of event

1  
2  
3 reporting (FER), the data also showed a positive correlation with most of the dimensions in  
4  
5 both samples. In both samples, most dimensions had a positive association with overall grade  
6  
7 for patient safety (OGPS). Regarding the number of events reported (NER), the Palestinian  
8  
9 sample had a significant and negative relationship with four dimensions: supervisor/manager  
10  
11 expectations and actions promoting safety, non-punitive response to error, staffing and  
12  
13 teamwork across hospital units and hospital handoffs and transitions. A negative correlation  
14  
15 indicates the existence of an inverse relationship between two variables; that is, an increase in  
16  
17 one variable is associated with a decrease in the other variable. This was also the case for the  
18  
19 Belgian sample, with the number of events reported found to be associated positively with  
20  
21 organizational learning–continuous improvement, and negatively with support from hospital  
22  
23 management for patient safety, staffing and teamwork across hospital units and during  
24  
25 hospital handoffs and transitions.  
26  
27

### 28 29 **Hierarchical regression analyses**

30  
31  
32 Regression analyses were used to investigate the predictive value of the PSC dimensions  
33  
34 regarding the four self-reported outcome measurements. The detailed results are shown in  
35  
36 Table 5 and the results are discussed generally below.  
37

#### 38 *Overall perceptions of safety (OPS)*

39  
40 The PSC dimensions explained 16% and 36% of the variance of OPS in the Palestinian and  
41  
42 Belgian samples, respectively. OPS outcome was predicted in both countries by teamwork  
43  
44 within hospital units, organizational learning–continuous improvement, supervisor/manager  
45  
46 expectations and actions promoting safety, support from hospital management for patient  
47  
48 safety, teamwork across hospital units and during hospital handoffs and transitions, and  
49  
50 feedback and communication openness regarding errors. The standardized beta ( $\beta$ ) values  
51  
52 ranged from 0.06 to 0.24 ( $P$ -values:  $<0.05$  to  $<0.001$ ). In addition to the previously mentioned  
53  
54 predictors of OPS, staffing was a predictor for the Belgian sample only ( $\beta = 0.24$ ,  $P < 0.001$ ).  
55  
56  
57  
58  
59

### *Frequency of event reporting (FER)*

In the Palestinian and Belgian sample, the PSC dimensions explained 22% and 18% of the variance of FER outcome, respectively. This outcome was predicted by teamwork across hospital units and during hospital handoffs and transitions, staffing, and feedback and communication openness regarding errors with  $\beta$ -values ranging from 0.06 to 0.35 ( $P$ -values  $<0.05$  to  $<0.001$ ). Organizational learning–continuous improvement ( $\beta = 0.14$ ,  $P <0.001$ ), and hospital management support for patient safety ( $\beta = 0.10$ ,  $P <0.001$ ) were also good predictors for the Palestinian sample.

### *Overall grade on patient safety (OGPS)*

In total, 20% of the OGPS was predicted by PSC dimensions in the Palestinian sample and 33% in the Belgian sample. The results revealed two similar predictors in the two countries, namely supervisor/manager expectations and actions promoting safety and teamwork across hospital units and during hospital handoffs and transitions, with  $\beta$ -values ranging from 0.12 to 0.17 ( $P <0.001$ ). In addition to the previously mentioned predictors, organizational learning–continuous improvement ( $\beta = 0.19$ ,  $P <0.001$ ) and non-punitive response to error ( $\beta = 0.09$ ,  $P <0.001$ ) were significant predictors of OGPS in Palestine. Furthermore, teamwork within hospital units ( $\beta = 0.11$ ,  $P <0.001$ ), support from hospital management for patient safety ( $\beta = 0.17$ ,  $P <0.001$ ), staffing ( $\beta = 0.19$ ,  $P <0.001$ ) and feedback and communication openness regarding errors ( $\beta = 0.15$ ,  $P <0.001$ ) were significant predictors of OGPS in Belgium.

### *Number of events reported (NER)*

The PSC dimensions predicted only 1% of the NER in Palestine and 5% in Belgium. Supervisor actions promoting safety and communication openness regarding errors were good predictors in both countries ( $\beta$  ranging from 0.05 to 0.16,  $P$ -values ranging from  $<0.05$  to  $<0.001$ ). In Palestine, non-punitive response to error ( $\beta = -0.08$ ,  $P <0.01$ ), and staffing ( $\beta = -0.20$ ,  $P <0.001$ ) were also predictors of the NER. Moreover, teamwork within hospital units

1  
2  
3 ( $\beta = -0.07, P < 0.05$ ), organizational learning–continuous improvement ( $\beta = 0.09, P < 0.01$ ),  
4 hospital management support for patient safety ( $\beta = -0.07, P < 0.05$ ), and teamwork across  
5 hospital units and during hospital handoffs and transitions ( $\beta = -0.08, P < 0.01$ ) were  
6 predictors in Belgium.  
7  
8  
9

## 10 11 12 **DISCUSSION**

13  
14 This study enabled us to draw conclusions regarding the extent to which each HSOPSC safety  
15 dimension contributes specifically to outcome dimensions. It is the first study to explore the  
16 predictive value of HSOPSC in matched samples from two different countries. As such, it  
17 provides information about: (a) the impact of the various PSC dimensions on patient safety  
18 outcomes, and (b) cross-cultural differences in this respect between Palestinian and Belgian  
19 hospitals. Thus, our research provides an improved understanding of the influence of  
20 initiatives to improve specific outcome measures on patient safety culture. Overall, our  
21 findings emphasize that the HSOPSC is a valid instrument that can be used to improve  
22 outcomes related to safe healthcare for patients. The results of our study demonstrate that at  
23 least two of the HSOPSC dimensions contribute to one of the self-reported outcome measures  
24 in each country. Thus, our findings attest to the value of the PSC dimensions regarding patient  
25 safety outcomes. Only one dimension, non-punitive response to error, was found to have no  
26 association with any of the outcome measures in Belgium. A possible explanation for this  
27 could be that this dimension has a low internal consistency level and, therefore, affected the  
28 assessment of its predictive value in the Belgian sample. Despite this finding, only a small  
29 number of differences were detected between the two samples.  
30  
31  
32  
33  
34  
35  
36  
37  
38  
39  
40  
41  
42  
43  
44  
45  
46  
47  
48

49 The results obtained for both the Palestinian and Belgian samples showed that hospitals  
50 should focus on investing in interventions that enable feedback and enhance communication  
51 openness regarding errors, sustain teamwork within and across hospital units, maintain  
52 organizational learning–continuous improvement, and improve hospital handoffs and  
53  
54  
55  
56  
57  
58  
59

1  
2  
3 transitions. These interventions will improve OPS. As such, our analyses and results explicitly  
4  
5 reveal ‘important’ PSC dimensions in terms of safety outcomes, and these PSC dimensions  
6  
7 are shown to be the same for both the Palestinian and Belgian hospitals. Under such  
8  
9 circumstances, implementing strategies and tools such as TeamSTEPPS may improve  
10  
11 teamwork within and across units, in addition to strengthening communication and feedback  
12  
13 skills regarding errors to enable the establishment of a learning system based on previous  
14  
15 mistakes [33].  
16

17  
18 Event reporting is fundamental to the detection of patient safety problems and represents  
19  
20 a core prerequisite of effective clinical risk management [27,35]. This outcome is of particular  
21  
22 importance because these items reflect the frequency of the actual reporting of an act, and the  
23  
24 willingness to report unsafe events, with higher error reporting rates leading to a stronger  
25  
26 culture of accountability. The results showed that, in both the Palestinian and Belgian  
27  
28 samples, this outcome is influenced mainly by maintaining open lines of information and  
29  
30 communication in the unit. These observations are consistent with those reported by Pfeiffer  
31  
32 and Manser [27]. Moreover, improvements in staffing and teamwork may also influence this  
33  
34 outcome. Palestinian respondents found that managers who consider patient safety to be a top  
35  
36 priority and build constructive learning systems based on previous mistakes encourage their  
37  
38 staff to report adverse events. This result is also commonly reported in the published literature  
39  
40 [1,35].  
41  
42

43  
44 The overall grade for patient safety (OGPS) was found to be particularly significant in  
45  
46 building a constructive learning system based on previous mistakes in Palestine and in  
47  
48 improving staffing levels in Belgium. In other words, although our results revealed many  
49  
50 similarities between the matched set of Palestinian and Belgian healthcare professionals, we  
51  
52 also found cultural differences regarding OGPS. In accordance with previous studies, having  
53  
54 enough staff [36] and opportunities to learn from previous mistakes [6] increased the  
55  
56

1  
2  
3 likelihood of staff reporting good or excellent safety grades in Belgium. Other contributing  
4  
5 PSC dimensions are maintaining manager expectations and actions in promoting safety,  
6  
7 improving teamwork across hospital units and supporting hospital handoffs and transitions in  
8  
9 both countries. Our study also revealed that, in Palestine, a higher score for OGPS relates to  
10  
11 greater support regarding non-punitive response to error. Additionally, initiatives to improve  
12  
13 teamwork within units, support from hospital management for patient safety, staffing and  
14  
15 feedback and communication openness regarding errors may also act to improve OGPS in  
16  
17 Belgium.

18  
19  
20 As PSC dimensions explained only 1% (Palestine) and 5% (Belgium) of the number of  
21  
22 events reported (NER), influencing PSC dimensions will have less impact on patient safety  
23  
24 outcomes compared with other PSC outcomes ( $R^2_{\text{OPS-Palestine}} = 16\%$ ;  $R^2_{\text{OPS-Belgium}} = 36\%$ ;  $R^2_{\text{FER-}}$   
25  
26  $\text{Palestine}} = 22\%$ ;  $R^2_{\text{FER-Belgium}} = 18\%$ ;  $R^2_{\text{OGPS-Palestine}} = 20\%$ ;  $R^2_{\text{OGPS-Belgium}} = 33\%$ ). As such, the  
27  
28 HSOPSC seems to be particularly effective for the prediction of OPS, FER, and OGPS, in  
29  
30 both the Belgian and Palestinian samples. It can be speculated that the finding that NER is  
31  
32 less well explained through the PSC dimensions is caused by the broad scope of the HSOPSC  
33  
34 PSC dimensions regarding patient safety, which consequently renders this instrument less  
35  
36 effective for this very specific outcome. A further explanation could be that our results stem  
37  
38 not from a low predictive value, but from the under-reporting of adverse events, which would  
39  
40 result in a low mean and low variance regarding this outcome dimension. A final explanation  
41  
42 could be that respondents found it difficult to answer this question based on experience, as  
43  
44 they may not themselves know how many events have been reported. Therefore, hospitals  
45  
46 seeking to invest in patient safety must not only measure NER, but should also link the PSC  
47  
48 dimensions to objective measurements of NER.  
49  
50

51  
52 To summarize, our results suggest that improved self-reported outcome measures  
53  
54 regarding patient safety in both Palestine and Belgium are more likely to be achieved through  
55  
56  
57  
58  
59

1  
2  
3 better teamwork across units and during hospital handoffs and transitions, encouraging  
4  
5 feedback and communications regarding errors, and implementing actions to promote safety.  
6  
7 Furthermore, improving teamwork within hospital units, providing a work climate that  
8  
9 promotes the adoption of safety as a top priority by hospital management and resolving  
10  
11 staffing problems will also influence most outcome measures in Belgium [37,38]. In  
12  
13 Palestine, bringing errors to the attention of managers and other staff and using mistakes as  
14  
15 valuable learning opportunities [3] may also have an impact on safety outcome measures.  
16  
17

### 18 **Limitations and future research**

19  
20  
21 The current study has some methodological limitations that should be noted. First, the study  
22  
23 used a cross-sectional design; therefore, claims of causal relationships are not possible.  
24  
25 Second, as the present study relied exclusively on subjective measures that reflect the  
26  
27 willingness of respondents to report events, and more specifically, the reporting of near  
28  
29 misses, the results may be distorted by the common method bias of these self-reported  
30  
31 outcome measures. Future research should examine the relationship between PSC dimensions  
32  
33 and actual adverse event rates to clarify this relationship by linking objective data with PSC  
34  
35 dimensions. Nevertheless, this study is the first to provide further insights into the value of the  
36  
37 HSOPSC in terms of: (a) the impact of the PSC dimensions on patient safety outcomes, and  
38  
39 (b) in different cultural settings. Third, the associations between the safety and PSC outcomes  
40  
41 of the HSOPSC were investigated using a matched sample (to rule out possible bias due to  
42  
43 sample differences between the two countries) using linear regression analyses. However, we  
44  
45 cannot ignore the limitation of this design, which uses the most influential variables that are,  
46  
47 in fact, approximations made from the researchers' perspective. These assumptions might be  
48  
49 incorrect and could lead to the introduction of major confounding variables. Despite these  
50  
51 methodological restrictions, previous research has shown that matched samples designs are  
52  
53 useful, allowing researchers to conduct streamlined and focused research while maintaining a  
54  
55  
56  
57



1  
2  
3 good degree of validity [39]. Another possible concern is that as most respondents were  
4  
5 nurses and other health professionals; thus, the results may reflect the personal perceptions of  
6  
7 the respondents and affect our association results. However, we should not forget that nurses  
8  
9 are the most highly represented staffing group in hospitals, and that our sample also included  
10  
11 physicians, pharmacists, administrative and quality and safety staff. Finally, the Cronbach's  
12  
13 alpha values for some of the composite scores measuring PSC were low ( $\alpha < 0.70$ ), which  
14  
15 may affect the correlation results, as in the Palestinian sample where all PSC dimensions were  
16  
17 positively associated with the OGPS (except staffing). This specific dimension has shown a  
18  
19 low internal consistency in most psychometric evaluation studies of the HSOPSC [21,33],  
20  
21 indicating that it is necessary to review and update the items of this dimension to improve its  
22  
23 internal consistency. Our results further attest to the international and cross-cultural validity of  
24  
25 the HSOPSC. The relationships between the PSC and self-reported outcomes in other  
26  
27 countries will provide further evidence in this regard.  
28  
29  
30

### 31 **Conclusion**

32  
33  
34 We found that perceptions of staffing and feedback and communication regarding errors were  
35  
36 important predictive dimensions of PSC self-reported outcome measures in both countries.  
37  
38 But we also found some contradictory results in our matched sample. Future research should  
39  
40 focus on enriching the evidence of the linking of safety culture and hard patient safety  
41  
42 outcomes in order to assess the practical validity of safety culture surveys. The divergences of  
43  
44 patient safety perceptions in both countries implicate the need of local priority setting and a  
45  
46 tailor-made approach for improvement strategies in hospitals. A great challenge lies in the  
47  
48 field of implementation science, testing the effectiveness of safety culture strategies.  
49  
50  
51  
52  
53  
54  
55  
56  
57  
58  
59  
60

### List of abbreviations

|                   |                                                                      |
|-------------------|----------------------------------------------------------------------|
| AHRQ              | Agency for healthcare research and quality                           |
| $\beta$           | Standardized beta values                                             |
| FB&ComE           | Feedback and communication openness about errors                     |
| FER               | Frequency of event reporting                                         |
| HMS               | Hospital management support for patient safety                       |
| HSOPSC            | Hospital survey on patient safety culture                            |
| NER               | Number of events reported                                            |
| NPRE              | Non-punitive response to error                                       |
| OGPS              | Overall grade of patient safety                                      |
| OPS               | Overall perceptions of safety                                        |
| OrgLearn          | Organizational learning—continuous improvement                       |
| Staff             | Staffing                                                             |
| Sup./Man._actions | Supervisor/manager expectations and actions promoting safety         |
| TW _units         | Teamwork within hospital units                                       |
| TWacross_HHT      | Teamwork across hospital units and hospital handoffs and transitions |

### Competing interests

The authors declare that they have no competing interests.

### Authors' contributions

SN performed the overall statistical analyses and drafted the manuscript. EB actively contributed to the statistical analyses, the interpretation of the results, and to the preparation of the manuscript. MH coordinated data collection (Palestine) and critically revised the

1  
2  
3 manuscript. AVle and ME participated in critically revising the manuscript for important  
4 intellectual content. WSer and WSch participated in the analyses and interpretation of the data  
5 and contributed to the preparation of the manuscript. KV and JH were involved in the study  
6 design and revised the manuscript critically. JH coordinated the data collection (Belgium).  
7  
8 AVla was involved in the study design, manuscript outline, and contributed to the manuscript  
9 and data preparation (Belgian data). All authors have read and approved the final manuscript.  
10  
11  
12  
13  
14  
15

### 16 **Acknowledgments**

17  
18 We particularly acknowledge all participant hospitals and their staff who devoted time to  
19 completing the surveys. We extend our gratitude to the Palestinian and Belgian governments  
20 for their cooperation and supporting this research.  
21  
22  
23  
24  
25  
26  
27  
28  
29  
30  
31  
32  
33  
34  
35  
36  
37  
38  
39  
40  
41  
42  
43  
44  
45  
46  
47  
48  
49  
50  
51  
52  
53  
54  
55  
56  
57  
58  
59  
60

## References

1. Schwendimann R, Zimmermann N, Küng K, et al. **Variation in safety culture dimensions within and between US and Swiss Hospital Units: an exploratory study.** *BMJ Qual Saf* 2013; **22**(1):32–41.
2. Donaldson LJ, Fletcher MG. **The WHO World Alliance for Patient Safety: towards the years of living less dangerously.** *Med J Aust* 2006; **184**:S69e72.
3. Najjar S, Hamdan M, Euwema MC, et al. **The Global Trigger Tool shows that one out of seven patients suffers harm in Palestinian hospitals: challenges for launching a strategic safety plan,** *Int J Qual Health Care* 2013; **25**:640–647, <https://doi.org/10.1093/intqhc/mzt066>.
4. Institute of Medicine. **To err is human: Building a safer health system.** Washington, D.C: *The National Academy press*, 2000.
5. Wakefield JG, Jorm CM. **Patient safety a balanced measurement framework.** *Aust Health Rev* 2009; **33** (3):382–389.
6. Stone PW, and Gershon PR. **Nurse Work Environments and Occupational Safety in Intensive Care Units.** *J Nurs Adm* 2009; **39**(7-8 Suppl):S27–34
7. Mardon RE, Khanna K, Sorra J, et al. **Exploring relationships between hospital patient safety culture and adverse events.** *J Patient Saf* 2010; **6**:226–32.
8. Singer S, Lin S, Falwell A, et al. **Relationship of safety climate and safety performance in hospitals.** *Health Serv Res* 2009; **44**:399–421.
9. Kotter JP, and Heskett JL. **Corporate Culture and Performance.** *New York: Free Press*,1992.
10. Carman JM, Shortell SM, Foster RW, et al. **Keys for Successful Implementation of Total Quality Management in Hospitals.** *Health Care Manage Rev.* 2010; **35**(4):283–93

- 1  
2  
3 11. Institute of Medicine. **Crossing the Quality Chasm: A New Health System for the**  
4  
5 **21st Century.** *Washington, DC: National Academy Press, 2001.*
- 6  
7 12. Edmondson AC. **Psychological Safety and Learning Behavior in Work Teams.**  
8  
9 *Administrative Science Quarterly* 1999; **44**(2):350–83.
- 10  
11 13. Hansen LO, Williams MV, and Singer SJ. **Perceptions of Hospital Safety Climate**  
12  
13 **and Incidence of Readmission.** *Health Serv Res* 2011; **46**(2):596–616.
- 14  
15 14. Sorra J, Famolaro T, Dyer N, et al. **Hospital Survey on Patient Safety Culture: 2012**  
16  
17 **User Comparative Database Report.** Prepared by Westat, Rockville, MD, under  
18  
19 Contract No. HHSA 290200710024C. AHRQ Publication No. 12-0017, January 2012.  
20  
21 Agency for Healthcare Research and Quality, Rockville, MD.  
22  
23 <http://www.ahrq.gov/qual/hospsurvey12/index.html>  
24  
25
- 26  
27 15. Vlayen A, Hellings J, Claes N, Peleman H, Schrooten W. **A nationwide Hospital**  
28  
29 **Survey on Patient Safety Culture in Belgian hospitals: setting priorities at the**  
30  
31 **launch of a 5-year patient safety plan.** *BMJ Qual Saf* 2012;**21**(9):760–7.
- 32  
33 16. Deilkas E, Hofoss D. **Patient safety culture lives in departments and wards:**  
34  
35 **multilevel partitioning of variance in patient safety culture.** *BMC Health Serv Res*  
36  
37 2010; **10**:85.
- 38  
39 17. Sorra J, Dyer N: **Multilevel psychometric properties of the AHRQ hospital survey**  
40  
41 **on patient safety culture.** *BMC Health Serv Res* 2010; **10**:199.
- 42  
43 18. Waterson PE, Griffiths P, Stride C, et al. **Psychometric properties of the hospital**  
44  
45 **survey on patient safety culture: findings from the UK.** *Qual Saf Health Care*  
46  
47 2010; **19**:e2. doi:10.1136/qshc.2008.031625.
- 48  
49 19. Sarac C, Flin R, Mearns K, et al. **Hospital survey on patient safety culture:**  
50  
51 **psychometric analysis on a Scottish sample.** *Qual Saf Health Care* 2011;  
52  
53 **20**(10):842–8.  
54  
55  
56  
57  
58  
59  
60

- 1  
2  
3 20. Olsen E. **Reliability and validity of the Hospital Survey on Patient Safety Culture**  
4 **at a Norwegian hospital.** In: Øvretveit J, Sousa P, eds. *Quality and Safety*  
5 *Improvement Research: Methods and Research Practice from the International Quality*  
6 *Improvement Research Network (QIRN).* Lisbon: *National School of Public Health*  
7 *2008:173–86*
- 8  
9  
10  
11  
12  
13 21. Najjar S, Hamdan M, Baillan E, et al. **The Arabic version of the hospital survey on**  
14 **patient safety culture: a psychometric evaluation in a Palestinian sample.** *BMC*  
15 *Health Serv Res* 2013; **13**:193. doi: 10.1186/1472-6963-13-193.
- 16  
17  
18  
19  
20 22. Colla JB, Bracken AC, Kinney LM, et al. **Measuring patient safety climate: a**  
21 **review of surveys.** *Qual Saf Health Care* 2005; **14**:364–366.
- 22  
23  
24 23. Sexton JB, Helmreich RL, Neilands TB, et al. **The Safety Attitudes Questionnaire:**  
25 **Psychometric Properties, Benchmarking Data, and Emerging Research.** *BMC*  
26 *Health Serv Res* 2006; **6**:44.
- 27  
28  
29  
30  
31 24. Sammer CE, Lykens K, Singh KP, et al. **What is patient safety culture? A review of**  
32 **the literature.** *J Nurs Scholarsh* 2010; **42**(2):156–65.
- 33  
34  
35 25. Hellings J, Schrooten W, Klazinga N, Vleugels A. **Challenging patient safety**  
36 **culture: survey results.** *Int J Health Care Qual Assur.* 2007; **20**(7):620-32.
- 37  
38  
39  
40 26. Vlayen A, Hellings J, Claes N, Abdou EA, Schrooten W. **Measuring safety culture**  
41 **in belgian psychiatric hospitals: validation of the dutch and French translations**  
42 **of the hospital survey on patient safety culture.** *J Psychiatr Pract.* 2015; **21**(2):124-  
43 39.
- 44  
45  
46  
47  
48 27. Pfeiffer Y, Manser T. **Development of the German version of the Hospital Survey**  
49 **on Patient Safety Culture: Dimensionality and psychometric properties.** *Safety*  
50 *Science* 2010; **48** (10):1452–1462.
- 51  
52  
53  
54  
55  
56  
57  
58  
59  
60

- 1  
2  
3 28. West Bank and Gaza **Public Expenditure Review of the Palestinian Authority.**  
4  
5 **Towards Enhanced Public Finance Management and Improved Fiscal**  
6  
7 **Sustainability.** Washington DC: World Bank; 2016.  
8  
9 <http://documents.worldbank.org/curated/en/320891473688227759/pdf/ACS18454->  
10  
11 [REVISIED-FINAL-PER-SEPTEMBER-2016-FOR-PUBLIC-DISCLOSURE-PDF.pdf.](http://documents.worldbank.org/curated/en/320891473688227759/pdf/ACS18454-)  
12  
13 accessed 18, May 2018.  
14  
15  
16 29. WHO. **Country Cooperation Strategy WHO - BELGIUM 2016-2022.**  
17 [http://www.euro.who.int/\\_data/assets/pdf\\_file/0009/329778/CCS-Belgium-2016-](http://www.euro.who.int/_data/assets/pdf_file/0009/329778/CCS-Belgium-2016-)  
18 [2022-en.pdf.](http://www.euro.who.int/_data/assets/pdf_file/0009/329778/CCS-Belgium-2016-) Accessed 18, May 2018.  
19  
20  
21 30. Palestinian Central Bureau of Statistics. Statistics from Palestine.  
22 <https://thisweekinpalestine.com/wp-content/uploads/2014/11/Statistics-from->  
23 [Palestine.pdf.](https://thisweekinpalestine.com/wp-content/uploads/2014/11/Statistics-from-) Accessed May 18, 2018  
24  
25  
26  
27 31. El-Jardali F, Jafar M, Dimmasi H, et al. **The current state of patient safety culture**  
28 **in Lebanese hospitals: a study at baseline.** *Int J Qual Health Care* 2010; **22**:386–95.  
29  
30  
31 32. Hickner J, Smith SA, Yount N, et al **Differing perceptions of safety culture across**  
32 **job roles in the ambulatory setting: analysis of the AHRQ Medical Office Survey**  
33 **on Patient Safety Culture.** *BMJ Qual Saf* 2016 Aug; **25**(8):588-94.  
34  
35  
36  
37 33. Sorra JS, Nieva VF. **Hospital Survey on Patient Safety Culture.** AHRQ Publication  
38 No. 04-0041. Rockville, MD: Agency for Healthcare Research and Quality; 2004.  
39  
40  
41  
42 34. Hayes, A. F. Introduction to mediation, moderation, and conditional process analysis:  
43 A regression-based approach. New York, NY, US: Guilford Press 2017.  
44  
45  
46 35. Westrum R, **A typology of organisational cultures.** *Qual Saf Health Care* 2004; **13**  
47 (Suppl. 2): pp. ii22–ii27.  
48  
49  
50  
51 36. Aiken A, Sermeus W, Van den Heede K, et al. **Patient safety, satisfaction, and**  
52 **quality of hospital care: cross sectional surveys of nurses and patients in 12**  
53  
54  
55  
56  
57  
58  
59  
60

- 1  
2  
3 **countries in Europe and the United States.** *BMJ* 2012; **344**:e1717doi:  
4  
5 10.1136/bmj.e1717.  
6  
7 37. Keller SM. **Effects of extended work shifts and shift work on patient safety,**  
8  
9 **productivity, and employee health.** *AAOHNJ* 2009; **57** (12):497–502.  
10  
11 38. Mark BA, Harless DW and Berman WF. **Nurse Staffing and Adverse Events in**  
12  
13 **Hospitalized Children.** *Policy Polit Nurs Pract* 2007; **8**(2): 83–92.  
14  
15 39. Stuart EA. **Matching methods for causal inference: A review and a look forward.**  
16  
17 *Stat Sci* 2010; **25**(1):1–21.  
18  
19  
20  
21  
22  
23  
24  
25  
26  
27  
28  
29  
30  
31  
32  
33  
34  
35  
36  
37  
38  
39  
40  
41  
42  
43  
44  
45  
46  
47  
48  
49  
50  
51  
52  
53  
54  
55  
56  
57  
58  
59  
60



**Table 1:** Definitions of patient safety culture dimensions and outcomes

| Patient safety culture dimensions                                                                                                                                                       | Items                                                                                                                                                                                                                                                                                                                                                                                     |
|-----------------------------------------------------------------------------------------------------------------------------------------------------------------------------------------|-------------------------------------------------------------------------------------------------------------------------------------------------------------------------------------------------------------------------------------------------------------------------------------------------------------------------------------------------------------------------------------------|
| <p><b>Communication openness:</b> Staff freely speak up if they see something that may negatively affect a patient and feel free to question those with more authority.</p>             | <ul style="list-style-type: none"> <li>• Staff will freely speak up if they see something that may negatively affect patient care.</li> <li>• Staff feel free to question the decisions or actions of those with more authority.</li> <li>• Staff are afraid to ask questions when something does not seem right.</li> </ul>                                                              |
| <p><b>Feedback and communication about errors:</b> Staff are informed about errors that happen, given feedback about changes implemented, and discuss ways to prevent errors.</p>       | <ul style="list-style-type: none"> <li>• We are given feedback about changes put into place based on event reports.</li> <li>• We are informed about errors that happen in this unit.</li> <li>• In this unit, we discuss ways to prevent errors from happening again.</li> </ul>                                                                                                         |
| <p><b>Hospital handoffs and transitions:</b> Important patient care information is transferred across hospital units and during shift changes.</p>                                      | <ul style="list-style-type: none"> <li>• Things “fall between the cracks” when transferring patients from one unit to another.</li> <li>• Important patient care information is often lost during shift changes.</li> <li>• Problems often occur in the exchange of information across hospital units.</li> <li>• Shift changes are problematic for patients in this hospital.</li> </ul> |
| <p><b>Hospital management support for patient safety:</b> Hospital management provides a work climate that promotes patient safety and shows that patient safety is a top priority.</p> | <ul style="list-style-type: none"> <li>• Hospital management provides a work climate that promotes patient safety.</li> <li>• The actions of hospital management show that patient safety is a top priority.</li> <li>• Hospital management seems interested in patient safety only after an adverse event happens.</li> </ul>                                                            |

**Non-punitive response to error:**

Staff feel that their mistakes and event reports are not held against them and that mistakes are not kept in their file.

- Staff feel like their mistakes are held against them.
- When an event is reported, it feels like the person is being written up, not the problem.
- Staff worry that mistakes they make are kept in their file.

**Organizational learning–**

**Continuous improvement:**

Mistakes have led to positive changes and changes are evaluated for effectiveness.

- We are actively doing things to improve patient safety.
- Mistakes have led to positive changes here.
- After we make changes to improve patient safety, we evaluate their effectiveness.

**Staffing:** There is enough staff to handle the workload and work hours are appropriate to provide the best care for patients.

- We have enough staff to handle the workload.
- Staff in this unit work longer hours than is best for patient care.
- We use more agency/temporary staff than is best for patient care.
- We work in ‘crisis mode’, trying to do too much, too quickly.

**Supervisor/manager expectations and actions promoting safety:**

Supervisors/managers consider staff suggestions for improving patient safety, praise staff for following patient safety procedures, and do not overlook patient safety problems.

- My supervisor/manager offers praise when he/she sees a job done according to established patient safety procedures.
- My supervisor/manager seriously considers staff suggestions for improving patient safety.
- Whenever pressure builds up, my supervisor/manager wants us to work faster, even if it means taking shortcuts.
- My supervisor/manager overlooks patient safety problems that happen repeatedly.

**Teamwork across hospital units:**

Hospital units cooperate and

- There is good cooperation among hospital units that need to work together.

coordinate with one another to provide the best care for patients.

- Hospital units work well together to provide the best care for patients.
- Hospital units do not coordinate well with each other.
- It is often unpleasant to work with staff from other hospital units.

**Teamwork within hospital units:** Staff support each other, treat each other with respect, and work together as a team.

- People support one another in this unit.
- When a lot of work needs to be done quickly, we work together as a team to get the work done.
- In this unit, people treat each other with respect.
- When one area in this unit gets really busy, others help out.

#### Self-reported outcome measures

Items

**Frequency of events reported:** Mistakes of the following types are reported: (1) Mistakes caught and corrected before affecting the patient; (2) Mistakes with no potential to harm the patient; and (3) Mistakes that could harm the patient but do not.

- When a mistake is made, but is caught and corrected before affecting the patient, how often is this reported?
- When a mistake is made, but has no potential to harm the patient, how often is this reported?
- When a mistake is made that could harm the patient, but does not, how often is this reported?

**Overall perceptions of patient safety:** Procedures and systems are good for the prevention of errors and there are minimal patient safety problems.

- Patient safety is never sacrificed to get more work done.
- Our procedures and systems are good for the prevention of errors.
- It is just by chance that more serious mistakes don't happen around here.
- We have patient safety problems in this unit.

**Patient safety grade:** Overall

- Please give your work area/unit in this hospital an overall

1  
2  
3 grade for patient safety for their grade for patient safety.  
4  
5 work area/unit.

6  
7 **Number of events reported:** The • In the past 12 months, how many event reports have you filled  
8 number of events reported over the out and submitted?  
9 past 12 months.  
10  
11  
12  
13

---

14  
15  
16  
17  
18  
19  
20  
21  
22  
23  
24  
25  
26  
27  
28  
29  
30  
31  
32  
33  
34  
35  
36  
37  
38  
39  
40  
41  
42  
43  
44  
45  
46  
47  
48  
49  
50  
51  
52  
53  
54  
55  
56  
57  
58  
59  
60

For peer review only

**Table 2: Percentage positive scores for patient safety dimensions and Cronbach's alpha of Hospital survey on patient safety culture (HSOPSC) in Palestine and Belgium**

| Patient safety culture dimensions                                               | Percent positive      | Percent positive    | Cronbach's         | Cronbach's       |
|---------------------------------------------------------------------------------|-----------------------|---------------------|--------------------|------------------|
|                                                                                 | response<br>Palestine | response<br>Belgium | alpha<br>Palestine | alpha<br>Belgium |
| Teamwork within hospital units (TW_units)                                       | 75%                   | 73%                 | 0.80               | 0.79             |
| Organizational learning–Continuous improvement (OrgLearn)                       | 64%                   | 49%                 | 0.73               | 0.61             |
| Supervisor/manager expectations & actions promoting safety (Sup./Man_actions)   | 55%                   | 58%                 | 0.74               | 0.74             |
| No punitive response to error (NPRE)                                            | 17%                   | 38%                 | 0.63               | 0.69             |
| Hospital management support for patient safety (HMS)                            | 42%                   | 33%                 | 0.76               | 0.77             |
| Teamwork across hospital units & hospital handoffs & transitions (TWacross_HHT) | 45%                   | 27%                 | 0.78               | 0.75             |
| Staffing (Staff)                                                                | 58%                   | 37%                 | 0.67               | 0.61             |
| Feedback & communication Openness about errors (FB&ComE)                        | 49%                   | 51%                 | 0.76               | 0.80             |
| <b>Patient safety culture outcomes</b>                                          |                       |                     |                    |                  |
| Frequency of event reporting (FER)                                              | 39%                   | 44%                 | 0.87               | 0.86             |
| Overall perceptions of safety (OPS)                                             | 55%                   | 47%                 | 0.75               | 0.73             |
| Overall grade of patient safety (OGPS)                                          | 49%                   | 39%                 | NA                 | NA               |
| Number of events reported (NER)                                                 | 45%                   | 69%                 | NA                 | NA               |

**Table 3: Participants' characteristics**

| Characteristics                            |                            | Whole sample | Palestinian sample<br>N = 1418 | Matched<br>Belgian sample<br>N = 1418 |
|--------------------------------------------|----------------------------|--------------|--------------------------------|---------------------------------------|
| Direct contact or interaction with patient | Yes                        | 2524 (88.9%) | 1284 (90.5%)                   | 1240 (87.4%)                          |
|                                            | No                         | 312 (11.0%)  | 134 (9.4%)                     | 178 (12.5%)                           |
| Experience at current work area/unit       | <i>&lt;1 year</i>          | 452 (15.9%)  | 218 (15.4%)                    | 234 (16.5%)                           |
|                                            | <i>1 to 5 years</i>        | 1206 (42.5%) | 621 (43.8%)                    | 585 (41.3%)                           |
|                                            | <i>6 to 10 years</i>       | 552 (19.5%)  | 250 (17.6%)                    | 302 (21.3%)                           |
|                                            | <i>11 to 15 years</i>      | 281 (09.9%)  | 162 (11.4%)                    | 119 (8.4%)                            |
|                                            | <i>16 to 20 years</i>      | 184 (06.5%)  | 81 (5.7%)                      | 104 (7.3%)                            |
|                                            | <i>&gt;21 years</i>        | 160 (05.6%)  | 86 (6.1%)                      | 74 (5.2%)                             |
| Hospital size (beds)                       | <i>Small (&lt;150)</i>     | 700 (24.7%)  | 612 (43.1%)                    | 88 (6.2%)                             |
|                                            | <i>Medium (150 to 249)</i> | 632 (22.3%)  | 546 (38.5%)                    | 86 (6.1%)                             |
|                                            | <i>Large (≥250)</i>        | 1504 (53.0%) | 260 (18.4%)                    | 1244 (87.7%)                          |

**Table 4: Spearman’s correlation matrixes (Belgian sample above the diagonal, Palestinian sample below the diagonal)**

|                               | 1      | 2      | 3      | 4      | 5       | 6       | 7       | 8       | 9       | 10     | 11      | 12     | 13      | 14      |
|-------------------------------|--------|--------|--------|--------|---------|---------|---------|---------|---------|--------|---------|--------|---------|---------|
| 1. Hospital years’ experience | –      | 0.01   | -0.05  | 0.06*  | -0.02   | -0.03   | 0.00    | -0.06*  | -0.09** | -0.00  | -0.08** | 0.04   | -0.06*  | 0.16**  |
| 2. Working hours              | 0.01   | –      | 0.03   | -0.03  | -0.02   | 0.02    | -0.09** | -0.07*  | -0.11** | 0.02   | 0.00    | -0.02  | -0.02   | 0.03    |
| 3. TW_units                   | -0.05  | 0.05*  | –      | 0.28** | 0.35**  | 0.33**  | 0.18**  | 0.21**  | 0.21**  | 0.42** | 0.29**  | 0.22** | 0.30**  | -0.05   |
| 4. OrgLearn                   | 0.00   | 0.09** | 0.35** | –      | 0.40**  | 0.24**  | 0.28**  | 0.17**  | 0.09**  | 0.43** | 0.29**  | 0.24** | 0.21**  | 0.10**  |
| 5. Sup./Man._actions          | -0.01  | 0.03   | 0.24** | 0.25** | –       | 0.34**  | 0.33**  | 0.22**  | 0.23**  | 0.51** | 0.41**  | 0.24** | 0.34**  | -0.04   |
| 6. NPRE                       | 0.03   | -0.03  | 0.07*  | 0.07** | 0.13**  | –       | 0.28**  | 0.20**  | 0.29**  | 0.32** | 0.30**  | 0.18** | 0.22**  | -0.00   |
| 7. HMS                        | -0.02  | 0.09** | 0.25** | 0.28** | 0.27**  | 0.25**  | –       | 0.33**  | 0.30**  | 0.35** | 0.39**  | 0.19** | 0.39**  | -0.07** |
| 8. TWacross_HHT               | -0.04  | 0.02   | 0.27** | 0.23** | 0.34**  | 0.21**  | 0.33**  | –       | 0.23**  | 0.24** | 0.28**  | 0.17** | 0.34**  | -0.11** |
| 9. Staff                      | -0.04  | -0.02  | -0.05  | -0.04  | 0.09**  | -0.12** | -0.08** | 0.01    | –       | 0.20** | 0.40**  | 0.05   | 0.35**  | -0.08** |
| 10. FB&ComE                   | -0.02  | 0.06*  | 0.31** | 0.33** | 0.32**  | 0.14**  | 0.31**  | 0.24**  | -0.03   | –      | 0.36**  | 0.41** | 0.38**  | 0.05    |
| 11. OPS                       | -0.02  | 0.06*  | 0.24** | 0.28** | 0.29**  | 0.11**  | 0.26**  | 0.24**  | 0.01    | 0.26** | –       | 0.20** | 0.51**  | -0.15** |
| 12. FER                       | 0.02   | 0.08** | 0.24** | 0.32** | 0.23**  | 0.13**  | 0.27**  | 0.28**  | 0.06*   | 0.37** | 0.23**  | –      | 0.21**  | 0.12**  |
| 13. OGPS                      | 0.09** | 0.17** | 0.22** | 0.32** | 0.25**  | 0.16**  | 0.25**  | 0.30**  | -0.05   | 0.22** | 0.19**  | 0.25** | –       | -0.12** |
| 14. NER                       | 0.00   | -0.01  | 0.01   | -0.03  | -0.11** | -0.07*  | -0.03   | -0.08** | -0.16** | 0.01   | -0.07** | 0.05*  | -0.09** | –       |

\*. Correlation is significant at the 0.05 level (2-tailed). \*\*. Correlation is significant at the 0.01 level (2-tailed).

1  
2  
3  
4  
5 **TW \_units**: Teamwork within hospital units; **OrgLearn**: Organizational learning–Continuous improvement; **Sup./Man.\_actions**:  
6 Supervisor/manager expectations and actions promoting safety; **NPRE**: Non-punitive response to error; **HMS**: Hospital management support for  
7 patient safety; **TWacross\_HHT**: Teamwork across hospital units and hospital handoffs and transitions; **Staff**: Staffing; **FB&ComE**: Feedback  
8 and communication openness about error; **OPS**: Overall perceptions of patient safety; **FER**: Frequency of events reported; **OGPS**: Overall grade  
9 for patient safety; **NER**: Number of events reported.  
10  
11  
12  
13  
14  
15  
16  
17  
18  
19  
20  
21  
22  
23  
24  
25  
26  
27  
28  
29  
30  
31  
32  
33  
34  
35  
36  
37  
38  
39  
40  
41  
42  
43  
44  
45  
46  
47

For peer review only



1  
2  
3  
4  
5  
6  
7  
8  
9  
10  
11  
12  
13  
14  
15  
16  
17  
18  
19  
20  
21  
22  
23  
24  
25  
26  
27  
28  
29  
30  
31  
32  
33  
34  
35  
36  
37  
38  
39  
40  
41  
42  
43  
44  
45  
46  
47

**Table 5: Summary of the hierarchical regression analyses: Predicting the outcomes of the Hospital survey on patient safety culture (HSOPSC) in matched samples of Palestinian and Belgian hospital workers (β)**

| Palestine (N = 1418) |                                     |         |                                    |         |                                         |         |                                 |         | Belgium (N = 1418)                  |                                    |       |                                         |       |                                 |         |         |
|----------------------|-------------------------------------|---------|------------------------------------|---------|-----------------------------------------|---------|---------------------------------|---------|-------------------------------------|------------------------------------|-------|-----------------------------------------|-------|---------------------------------|---------|---------|
| Outcome              | Overall perceptions of safety (OPS) |         | Frequency of event reporting (FER) |         | Overall grade for patient safety (OGPS) |         | Number of events reported (NER) |         | Overall perceptions of safety (OPS) | Frequency of event reporting (FER) |       | Overall grade for patient safety (OGPS) |       | Number of events reported (NER) |         |         |
|                      | Step1                               | Step2   | Step1                              | Step2   | Step1                                   | Step2   | Step1                           | Step2   |                                     | Step1                              | Step2 | Step1                                   | Step2 | Step1                           | Step2   |         |
| Predictors           |                                     |         |                                    |         |                                         |         |                                 |         |                                     |                                    |       |                                         |       |                                 |         |         |
| Hospital tenure      | -0.01                               | -0.00   | 0.02                               | 0.04    | 0.09***                                 | 0.09*** | .01                             | .01     | -0.06**                             | -0.04*                             | 0.04  | 0.04                                    | -0.04 | -0.02                           | 0.15*** | 0.13*** |
| Working hours        | 0.06**                              | 0.04    | 0.07**                             | 0.04    | 0.15***                                 | 0.12*** | -0.02                           | -0.02   | -0.00                               | 0.04                               | -0.03 | -0.03                                   | -0.02 | 0.03                            | 0.03    | 0.02    |
| Staff function       | 0.04                                | 0.00    | 0.03                               | -0.01   | 0.03                                    | 0.00    | -0.00                           | .01     | 0.09***                             | 0.06**                             | -0.04 | -0.04                                   | 0.06  | 0.04                            |         | 0.08**  |
| TW_units             |                                     | 0.10*** |                                    | 0.04    |                                         | 0.03    |                                 | .04     |                                     | 0.06**                             |       | 0.02                                    |       | 0.11***                         |         | -0.07*  |
| OrgLearn             |                                     | 0.10*** |                                    | 0.14*** |                                         | 0.19*** |                                 | -.03    |                                     | 0.10***                            |       | 0.04                                    |       | -0.00                           |         | 0.09**  |
| Sup./Man_actions     |                                     | 0.13*** |                                    | 0.00    |                                         | 0.14*** |                                 | -.16*** |                                     | 0.17***                            |       | 0.00                                    |       | 0.12***                         |         | -0.08*  |
| NPRES                |                                     | 0.05    |                                    | 0.03    |                                         | 0.09*** |                                 | -.08**  |                                     | 0.03                               |       | 0.04                                    |       | -0.03                           |         | 0.04    |
| HMS                  |                                     | 0.16*** |                                    | 0.10*** |                                         | 0.05    |                                 | .01     |                                     | 0.19***                            |       | 0.04                                    |       | 0.17***                         |         | -0.07*  |
| TWacross_HHT         |                                     | 0.07**  |                                    | 0.13*** |                                         | 0.14*** |                                 | -.05    |                                     | 0.08**                             |       | 0.06*                                   |       | 0.17***                         |         | -0.08** |
| Staff                |                                     | 0.02    |                                    | 0.09*** |                                         | -0.01   |                                 | -.20*** |                                     | 0.24***                            |       | -0.07**                                 |       | 0.19***                         |         | -0.05   |
| FB&ComE              |                                     | 0.08**  |                                    | 0.24*** |                                         | 0.01    |                                 | .05*    |                                     | 0.06*                              |       | 0.35***                                 |       | 0.15***                         |         | 0.11**  |
| R <sup>2</sup>       | .00                                 | 0.16*** | .00*                               | 0.22*** | 0.03***                                 | 0.20*** | -0.00                           | 0.01**  | 0.00***                             | 0.36***                            | 0.00  | 0.18***                                 | 0.00  | 0.33***                         | 0.02*** | 0.05*** |

The highest absolute values of the standardized beta are shaded. \* P < 0.05; \*\* P < 0.01; \*\*\* P < 0.001

**TW\_units**: Teamwork within hospital units; **OrgLearn**: Organizational learning–Continuous improvement; **Sup./Man\_actions**: Supervisor/manager expectations and actions promoting safety; **NPRES**: Non-punitive response to error; **HMS**: Hospital management support for patient safety; **TWacross\_HHT**: Teamwork across hospital units and hospital handoffs and transitions; **Staff**: Staffing; **FB&ComE**: Feedback

1  
2  
3  
4  
5 and communication openness about error; **OPS**: Overall perceptions of patient safety; **FER**: Frequency of events reported; **OGPS**: overall grade  
6 of patient safety; **NER**: Number of events reported.  
7  
8  
9  
10  
11  
12  
13  
14  
15  
16  
17  
18  
19  
20  
21  
22  
23  
24  
25  
26  
27  
28  
29  
30  
31  
32  
33  
34  
35  
36  
37  
38  
39  
40  
41  
42  
43  
44  
45  
46  
47

For peer review only

STROBE 2007 (v4) Statement—Checklist of items that should be included in reports of *cross-sectional studies*

## Similarities and differences in the associations between patient safety culture dimensions and self-reported outcomes in two different culture settings: A national cross-sectional study in Palestinian and Belgian hospitals

| Section/Topic                | Item # | Recommendation                                                                                                                                                                       | Reported on page # |
|------------------------------|--------|--------------------------------------------------------------------------------------------------------------------------------------------------------------------------------------|--------------------|
| Title and abstract           | 1      | (a) Indicate the study's design with a commonly used term in the title or the abstract                                                                                               | 1 & 3              |
|                              |        | (b) Provide in the abstract an informative and balanced summary of what was done and what was found                                                                                  | 3                  |
| <b>Introduction</b>          |        |                                                                                                                                                                                      |                    |
| Background/rationale         | 2      | Explain the scientific background and rationale for the investigation being reported                                                                                                 | 6                  |
| Objectives                   | 3      | State specific objectives, including any prespecified hypotheses                                                                                                                     | 6                  |
| <b>Methods</b>               |        |                                                                                                                                                                                      |                    |
| Study design                 | 4      | Present key elements of study design early in the paper                                                                                                                              | 7                  |
| Setting                      | 5      | Describe the setting, locations, and relevant dates, including periods of recruitment, exposure, follow-up, and data collection                                                      | 7 & 8              |
| Participants                 | 6      | (a) Give the eligibility criteria, and the sources and methods of selection of participants                                                                                          | 7 & 8              |
| Variables                    | 7      | Clearly define all outcomes, exposures, predictors, potential confounders, and effect modifiers. Give diagnostic criteria, if applicable                                             | 9                  |
| Data sources/<br>measurement | 8*     | For each variable of interest, give sources of data and details of methods of assessment (measurement). Describe comparability of assessment methods if there is more than one group | 8 & 9              |
| Bias                         | 9      | Describe any efforts to address potential sources of bias                                                                                                                            | 9                  |
| Study size                   | 10     | Explain how the study size was arrived at                                                                                                                                            | 8                  |
| Quantitative variables       | 11     | Explain how quantitative variables were handled in the analyses. If applicable, describe which groupings were chosen and why                                                         | 9                  |
| Statistical methods          | 12     | (a) Describe all statistical methods, including those used to control for confounding                                                                                                | 10 & 11            |

|                          |     |                                                                                                                                                                                                              |         |
|--------------------------|-----|--------------------------------------------------------------------------------------------------------------------------------------------------------------------------------------------------------------|---------|
|                          |     | (b) Describe any methods used to examine subgroups and interactions                                                                                                                                          | 10      |
|                          |     | (c) Explain how missing data were addressed                                                                                                                                                                  | NA      |
|                          |     | (d) If applicable, describe analytical methods taking account of sampling strategy                                                                                                                           | 10 & 11 |
|                          |     | (e) Describe any sensitivity analyses                                                                                                                                                                        | NA      |
| <b>Results</b>           |     |                                                                                                                                                                                                              |         |
| Participants             | 13* | (a) Report numbers of individuals at each stage of study—eg numbers potentially eligible, examined for eligibility, confirmed eligible, included in the study, completing follow-up, and analysed            | 10      |
|                          |     | (b) Give reasons for non-participation at each stage                                                                                                                                                         | NA      |
|                          |     | (c) Consider use of a flow diagram                                                                                                                                                                           | NA      |
| Descriptive data         | 14* | (a) Give characteristics of study participants (eg demographic, clinical, social) and information on exposures and potential confounders                                                                     | 11      |
|                          |     | (b) Indicate number of participants with missing data for each variable of interest                                                                                                                          | NA      |
| Outcome data             | 15* | Report numbers of outcome events or summary measures                                                                                                                                                         | 12 – 14 |
| Main results             | 16  | (a) Give unadjusted estimates and, if applicable, confounder-adjusted estimates and their precision (eg, 95% confidence interval). Make clear which confounders were adjusted for and why they were included | 12 – 14 |
|                          |     | (b) Report category boundaries when continuous variables were categorized                                                                                                                                    | NA      |
|                          |     | (c) If relevant, consider translating estimates of relative risk into absolute risk for a meaningful time period                                                                                             | NA      |
| Other analyses           | 17  | Report other analyses done—eg analyses of subgroups and interactions, and sensitivity analyses                                                                                                               | 12 – 14 |
| <b>Discussion</b>        |     |                                                                                                                                                                                                              |         |
| Key results              | 18  | Summarise key results with reference to study objectives                                                                                                                                                     | 14      |
| Limitations              | 19  | Discuss limitations of the study, taking into account sources of potential bias or imprecision. Discuss both direction and magnitude of any potential bias                                                   | 17 - 18 |
| Interpretation           | 20  | Give a cautious overall interpretation of results considering objectives, limitations, multiplicity of analyses, results from similar studies, and other relevant evidence                                   | 15-18   |
| Generalisability         | 21  | Discuss the generalisability (external validity) of the study results                                                                                                                                        | 18      |
| <b>Other information</b> |     |                                                                                                                                                                                                              |         |
| Funding                  | 22  | Give the source of funding and the role of the funders for the present study and, if applicable, for the original study on which the present article is based                                                | NA      |

\*Give information separately for cases and controls in case-control studies and, if applicable, for exposed and unexposed groups in cohort and cross-sectional studies.

1  
2  
3  
4  
5  
6  
7  
8  
9  
10  
11  
12  
13  
14  
15  
16  
17  
18  
19  
20  
21  
22  
23  
24  
25  
26  
27  
28  
29  
30  
31  
32  
33  
34  
35  
36  
37  
38  
39  
40  
41  
42  
43  
44  
45  
46  
47

**Note:** An Explanation and Elaboration article discusses each checklist item and gives methodological background and published examples of transparent reporting. The STROBE checklist is best used in conjunction with this article (freely available on the Web sites of PLoS Medicine at <http://www.plosmedicine.org/>, Annals of Internal Medicine at <http://www.annals.org/>, and Epidemiology at <http://www.epidem.com/>). Information on the STROBE Initiative is available at [www.strobe-statement.org](http://www.strobe-statement.org).

For peer review only
